# Supplementary material for: Patient experiences with physiotherapy for knee osteoarthritis in Australia—a qualitative study
Source: PubMed Central journal article supplement — BMJ Open. 2021 Mar 8;11(3):e043689. doi: 10.1136/bmjopen-2020-043689 (PMC7942256; doi:10.1136/bmjopen-2020-043689), 2021-03-08
Supplement: bmjopen-2020-043689.draft_revisions.pdf [file bmjopen-2020-043689.draft_revisions.pdf]

# BMJ Open

BMJ Open is committed to open peer review. As part of this commitment we make the peer review history of every article we publish publicly available.

When an article is published we post the peer reviewers' comments and the authors' responses online. We also post the versions of the paper that were used during peer review. These are the versions that the peer review comments apply to.

The versions of the paper that follow are the versions that were submitted during the peer review process. They are not the versions of record or the final published versions. They should not be cited or distributed as the published version of this manuscript.

BMJ Open is an open access journal and the full, final, typeset and author-corrected version of record of the manuscript is available on our site with no access controls, subscription charges or pay-per-view fees (<http://bmjopen.bmj.com>).

If you have any questions on BMJ Open's open peer review process please email [info.bmjopen@bmj.com](mailto:info.bmjopen@bmj.com)

# BMJ Open

## Patient experiences with physiotherapy for knee osteoarthritis in Australia – a qualitative study

|                               |                                                                                                                                                                                                                                                                                                  |
|-------------------------------|--------------------------------------------------------------------------------------------------------------------------------------------------------------------------------------------------------------------------------------------------------------------------------------------------|
| Journal:                      | <i>BMJ Open</i>                                                                                                                                                                                                                                                                                  |
| Manuscript ID                 | bmjopen-2020-043689                                                                                                                                                                                                                                                                              |
| Article Type:                 | Original research                                                                                                                                                                                                                                                                                |
| Date Submitted by the Author: | 11-Aug-2020                                                                                                                                                                                                                                                                                      |
| Complete List of Authors:     | Teo, Pek Ling; The University of Melbourne, Bennell, Kim; University of Melbourne, CHESM Lawford, Belinda; The University of Melbourne Egerton, T; University of Melbourne, Dziedzic, Krysia; Arthritis Research Campaign National Primary Care Centre Hinman, Rana S.; University of Melbourne, |
| Keywords:                     | Adult orthopaedics < ORTHOPAEDIC & TRAUMA SURGERY, Musculoskeletal disorders < ORTHOPAEDIC & TRAUMA SURGERY, QUALITATIVE RESEARCH                                                                                                                                                                |
|                               |                                                                                                                                                                                                                                                                                                  |

SCHOLARONE™  
Manuscripts

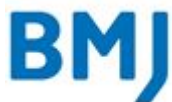

I, the Submitting Author has the right to grant and does grant on behalf of all authors of the Work (as defined in the below author licence), an exclusive licence and/or a non-exclusive licence for contributions from authors who are: i) UK Crown employees; ii) where BMJ has agreed a CC-BY licence shall apply, and/or iii) in accordance with the terms applicable for US Federal Government officers or employees acting as part of their official duties; on a worldwide, perpetual, irrevocable, royalty-free basis to BMJ Publishing Group Ltd ("BMJ") its licensees and where the relevant Journal is co-owned by BMJ to the co-owners of the Journal, to publish the Work in this journal and any other BMJ products and to exploit all rights, as set out in our [licence](#).

The Submitting Author accepts and understands that any supply made under these terms is made by BMJ to the Submitting Author unless you are acting as an employee on behalf of your employer or a postgraduate student of an affiliated institution which is paying any applicable article publishing charge ("APC") for Open Access articles. Where the Submitting Author wishes to make the Work available on an Open Access basis (and intends to pay the relevant APC), the terms of reuse of such Open Access shall be governed by a Creative Commons licence – details of these licences and which [Creative Commons](#) licence will apply to this Work are set out in our licence referred to above.

Other than as permitted in any relevant BMJ Author's Self Archiving Policies, I confirm this Work has not been accepted for publication elsewhere, is not being considered for publication elsewhere and does not duplicate material already published. I confirm all authors consent to publication of this Work and authorise the granting of this licence.

1  
2  
3 **Title: Patient experiences with physiotherapy for knee osteoarthritis in Australia – a**  
4 **qualitative study**  
5  
6

7  
8 Pek Ling Teo, BPhysio, MHSc<sup>1</sup>, Kim L. Bennell, BAppSci (Physio), PhD<sup>1</sup>, Belinda J. Lawford,  
9 BMedSci, BHlthSci(Hons), PhD<sup>1</sup>, Thorlene Egerton, BPhy, PhD<sup>1</sup>, Krysia S. Dziedzic,  
10 GradDipPhys, PhD<sup>2</sup>, Rana S. Hinman, BPhysio (Hons), PhD<sup>1</sup>  
11  
12  
13  
14  
15

16 <sup>1</sup>Centre for Health, Exercise and Sports Medicine, Department of Physiotherapy, School of Health  
17 Sciences, The University of Melbourne, Victoria, Australia  
18  
19

20  
21 <sup>2</sup>Impact Accelerator Unit, School of Primary Community and Social Care, Keele University,  
22 Keele, Staffordshire, ST5 5BG, UK  
23  
24  
25

26 **Address correspondence to:**

27  
28 Rana Hinman,  
29

30  
31 Centre for Health, Exercise & Sports Medicine, Department of Physiotherapy, Office 708, Level  
32 7, Alan Gilbert Building, Building 104, 161 Barry Street, The University of Melbourne, Victoria  
33 3010. T: +61 3 8344 3223. [ranash@unimelb.edu.au](mailto:ranash@unimelb.edu.au)  
34  
35  
36  
37

38 **Email addresses:** Pek Ling Teo [plteo@student.unimelb.edu.au](mailto:plteo@student.unimelb.edu.au)  
39 Kim Bennell [k.bennell@unimelb.edu.au](mailto:k.bennell@unimelb.edu.au)  
40 Belinda Lawford [belinda.lawford@unimelb.edu.au](mailto:belinda.lawford@unimelb.edu.au)  
41 Thorlene Egerton [thorlene.egerton@unimelb.edu.au](mailto:thorlene.egerton@unimelb.edu.au)  
42 Krysia Dziedzic [k.s.dziedzic@keele.ac.uk](mailto:k.s.dziedzic@keele.ac.uk)  
43  
44  
45  
46  
47  
48  
49

50 **Word count:** 3596  
51

52 **Key words:** qualitative research, physiotherapy, knee osteoarthritis, exercise, patient experience.  
53  
54  
55  
56

## Abstract

*Objective:* Physiotherapists commonly provide non-surgical care for people with knee osteoarthritis (OA). This study aimed to explore the experiences of people who had recently received physiotherapy care for their knee OA in Australia.

*Design:* Qualitative study using semi-structured individual telephone interviews and thematic analysis. Questions were informed by seven quality statements of the Australian government's OA of the Knee Clinical Care Standard.

*Setting:* Participants were recruited from around Australia via Facebook and our research volunteer database.

*Participants:* Interviews were conducted with a sample of twenty-four people with recent experience (prior six months) receiving physiotherapy care for their knee OA in Australia. They were required to be aged 45 years or above, had activity-related knee pain and any knee-related morning stiffness lasted no longer than 30 minutes. Participants were excluded if they had self-reported inflammatory arthritis and/or had undergone knee replacement surgery for the affected knee.

*Results:* Six themes emerged. 1) Participants arrived at physiotherapists with a pre-existing OA diagnosis and were comfortable with their established knowledge about OA; 2) Physiotherapy was accessed through various referral pathways, funding models and modes of delivery; 3) Physiotherapy care was sought for various reasons but commonly knee pain and functional impairments; 4) Physiotherapy care focussed on function and exercise and often involved adjunctive treatments but advice about surgery, medications and injections were perceived as beyond physiotherapists' scope of care; 5) Participants were happy and satisfied with their

1  
2  
3 physiotherapy experiences, describing trust and/or confidence in their physiotherapists and valuing  
4 personalised care; 6) Participants believed surgery was inevitable for their knee OA.  
5  
6  
7

8 *Conclusion:* These results provide evidence from the patients' perspectives about the important  
9 role physiotherapists play in the care of Australians with knee OA. Improved funding models and  
10 pathways for accessing physiotherapy care appear to be needed.  
11  
12  
13  
14  
15

### 16 **Strengths and limitations of this study**

- 17
- 18
- 19 • Qualitative research was used to explore the experiences of people receiving physiotherapy  
20 care for knee OA in Australia.  
21
- 22 • A range of participants was interviewed, including males and females of differing age,  
23 occupational status, and geographical location across Australia.  
24
- 25 • Participants responded to advertisements and/or email invitations to participate and thus our  
26 sample may be biased towards those who had favourable experiences with physiotherapy  
27 and/or were successful at accessing physiotherapy.  
28
- 29 • Our sample was constrained to participants who could speak English so may not represent the  
30 experiences of people from culturally and linguistically diverse backgrounds.  
31
- 32 • Physiotherapists are a primary contact health profession in Australia so patient experiences  
33 with physiotherapy care for knee OA may be different in other countries where people can  
34 only access a physiotherapist on referral.  
35  
36  
37  
38  
39  
40  
41  
42  
43  
44  
45  
46  
47  
48  
49  
50  
51  
52  
53  
54  
55  
56

1  
2  
3 Knee osteoarthritis (OA) is highly prevalent and a leading cause of pain and disability worldwide.

4  
5 (1) Clinical guidelines advocate non-surgical interventions such as exercise, weight loss (for  
6  
7  
8  
9  
10  
11  
12  
13  
14  
15  
16  
17  
18  
19  
20  
21  
22  
23  
24  
25  
26  
27  
28  
29  
30  
31  
32  
33  
34  
35  
36  
37  
38  
39  
40  
41  
42  
43  
44  
45  
46  
47  
48  
49  
50  
51  
52  
53  
54  
55  
56  
57  
58  
59  
60  
61  
62  
63  
64  
65  
66  
67  
68  
69  
70  
71  
72  
73  
74  
75  
76  
77  
78  
79  
80  
81  
82  
83  
84  
85  
86  
87  
88  
89  
90  
91  
92  
93  
94  
95  
96  
97  
98  
99  
100  
101  
102  
103  
104  
105  
106  
107  
108  
109  
110  
111  
112  
113  
114  
115  
116  
117  
118  
119  
120  
121  
122  
123  
124  
125  
126  
127  
128  
129  
130  
131  
132  
133  
134  
135  
136  
137  
138  
139  
140  
141  
142  
143  
144  
145  
146  
147  
148  
149  
150  
151  
152  
153  
154  
155  
156  
157  
158  
159  
160  
161  
162  
163  
164  
165  
166  
167  
168  
169  
170  
171  
172  
173  
174  
175  
176  
177  
178  
179  
180  
181  
182  
183  
184  
185  
186  
187  
188  
189  
190  
191  
192  
193  
194  
195  
196  
197  
198  
199  
200  
201  
202  
203  
204  
205  
206  
207  
208  
209  
210  
211  
212  
213  
214  
215  
216  
217  
218  
219  
220  
221  
222  
223  
224  
225  
226  
227  
228  
229  
230  
231  
232  
233  
234  
235  
236  
237  
238  
239  
240  
241  
242  
243  
244  
245  
246  
247  
248  
249  
250  
251  
252  
253  
254  
255  
256  
257  
258  
259  
260  
261  
262  
263  
264  
265  
266  
267  
268  
269  
270  
271  
272  
273  
274  
275  
276  
277  
278  
279  
280  
281  
282  
283  
284  
285  
286  
287  
288  
289  
290  
291  
292  
293  
294  
295  
296  
297  
298  
299  
300  
301  
302  
303  
304  
305  
306  
307  
308  
309  
310  
311  
312  
313  
314  
315  
316  
317  
318  
319  
320  
321  
322  
323  
324  
325  
326  
327  
328  
329  
330  
331  
332  
333  
334  
335  
336  
337  
338  
339  
340  
341  
342  
343  
344  
345  
346  
347  
348  
349  
350  
351  
352  
353  
354  
355  
356  
357  
358  
359  
360  
361  
362  
363  
364  
365  
366  
367  
368  
369  
370  
371  
372  
373  
374  
375  
376  
377  
378  
379  
380  
381  
382  
383  
384  
385  
386  
387  
388  
389  
390  
391  
392  
393  
394  
395  
396  
397  
398  
399  
400  
401  
402  
403  
404  
405  
406  
407  
408  
409  
410  
411  
412  
413  
414  
415  
416  
417  
418  
419  
420  
421  
422  
423  
424  
425  
426  
427  
428  
429  
430  
431  
432  
433  
434  
435  
436  
437  
438  
439  
440  
441  
442  
443  
444  
445  
446  
447  
448  
449  
450  
451  
452  
453  
454  
455  
456  
457  
458  
459  
460  
461  
462  
463  
464  
465  
466  
467  
468  
469  
470  
471  
472  
473  
474  
475  
476  
477  
478  
479  
480  
481  
482  
483  
484  
485  
486  
487  
488  
489  
490  
491  
492  
493  
494  
495  
496  
497  
498  
499  
500  
501  
502  
503  
504  
505  
506  
507  
508  
509  
510  
511  
512  
513  
514  
515  
516  
517  
518  
519  
520  
521  
522  
523  
524  
525  
526  
527  
528  
529  
530  
531  
532  
533  
534  
535  
536  
537  
538  
539  
540  
541  
542  
543  
544  
545  
546  
547  
548  
549  
550  
551  
552  
553  
554  
555  
556  
557  
558  
559  
560  
561  
562  
563  
564  
565  
566  
567  
568  
569  
570  
571  
572  
573  
574  
575  
576  
577  
578  
579  
580  
581  
582  
583  
584  
585  
586  
587  
588  
589  
590  
591  
592  
593  
594  
595  
596  
597  
598  
599  
600  
601  
602  
603  
604  
605  
606  
607  
608  
609  
610  
611  
612  
613  
614  
615  
616  
617  
618  
619  
620  
621  
622  
623  
624  
625  
626  
627  
628  
629  
630  
631  
632  
633  
634  
635  
636  
637  
638  
639  
640  
641  
642  
643  
644  
645  
646  
647  
648  
649  
650  
651  
652  
653  
654  
655  
656  
657  
658  
659  
660  
661  
662  
663  
664  
665  
666  
667  
668  
669  
670  
671  
672  
673  
674  
675  
676  
677  
678  
679  
680  
681  
682  
683  
684  
685  
686  
687  
688  
689  
690  
691  
692  
693  
694  
695  
696  
697  
698  
699  
700  
701  
702  
703  
704  
705  
706  
707  
708  
709  
710  
711  
712  
713  
714  
715  
716  
717  
718  
719  
720  
721  
722  
723  
724  
725  
726  
727  
728  
729  
730  
731  
732  
733  
734  
735  
736  
737  
738  
739  
740  
741  
742  
743  
744  
745  
746  
747  
748  
749  
750  
751  
752  
753  
754  
755  
756  
757  
758  
759  
760  
761  
762  
763  
764  
765  
766  
767  
768  
769  
770  
771  
772  
773  
774  
775  
776  
777  
778  
779  
780  
781  
782  
783  
784  
785  
786  
787  
788  
789  
790  
791  
792  
793  
794  
795  
796  
797  
798  
799  
800  
801  
802  
803  
804  
805  
806  
807  
808  
809  
810  
811  
812  
813  
814  
815  
816  
817  
818  
819  
820  
821  
822  
823  
824  
825  
826  
827  
828  
829  
830  
831  
832  
833  
834  
835  
836  
837  
838  
839  
840  
841  
842  
843  
844  
845  
846  
847  
848  
849  
850  
851  
852  
853  
854  
855  
856  
857  
858  
859  
860  
861  
862  
863  
864  
865  
866  
867  
868  
869  
870  
871  
872  
873  
874  
875  
876  
877  
878  
879  
880  
881  
882  
883  
884  
885  
886  
887  
888  
889  
890  
891  
892  
893  
894  
895  
896  
897  
898  
899  
900  
901  
902  
903  
904  
905  
906  
907  
908  
909  
910  
911  
912  
913  
914  
915  
916  
917  
918  
919  
920  
921  
922  
923  
924  
925  
926  
927  
928  
929  
930  
931  
932  
933  
934  
935  
936  
937  
938  
939  
940  
941  
942  
943  
944  
945  
946  
947  
948  
949  
950  
951  
952  
953  
954  
955  
956  
957  
958  
959  
960  
961  
962  
963  
964  
965  
966  
967  
968  
969  
970  
971  
972  
973  
974  
975  
976  
977  
978  
979  
980  
981  
982  
983  
984  
985  
986  
987  
988  
989  
990  
991  
992  
993  
994  
995  
996  
997  
998  
999  
1000  
1001  
1002  
1003  
1004  
1005  
1006  
1007  
1008  
1009  
1010  
1011  
1012  
1013  
1014  
1015  
1016  
1017  
1018  
1019  
1020  
1021  
1022  
1023  
1024  
1025  
1026  
1027  
1028  
1029  
1030  
1031  
1032  
1033  
1034  
1035  
1036  
1037  
1038  
1039  
1040  
1041  
1042  
1043  
1044  
1045  
1046  
1047  
1048  
1049  
1050  
1051  
1052  
1053  
1054  
1055  
1056  
1057  
1058  
1059  
1060  
1061  
1062  
1063  
1064  
1065  
1066  
1067  
1068  
1069  
1070  
1071  
1072  
1073  
1074  
1075  
1076  
1077  
1078  
1079  
1080  
1081  
1082  
1083  
1084  
1085  
1086  
1087  
1088  
1089  
1090  
1091  
1092  
1093  
1094  
1095  
1096  
1097  
1098  
1099  
1100  
1101  
1102  
1103  
1104  
1105  
1106  
1107  
1108  
1109  
1110  
1111  
1112  
1113  
1114  
1115  
1116  
1117  
1118  
1119  
1120  
1121  
1122  
1123  
1124  
1125  
1126  
1127  
1128  
1129  
1130  
1131  
1132  
1133  
1134  
1135  
1136  
1137  
1138  
1139  
1140  
1141  
1142  
1143  
1144  
1145  
1146  
1147  
1148  
1149  
1150  
1151  
1152  
1153  
1154  
1155  
1156  
1157  
1158  
1159  
1160  
1161  
1162  
1163  
1164  
1165  
1166  
1167  
1168  
1169  
1170  
1171  
1172  
1173  
1174  
1175  
1176  
1177  
1178  
1179  
1180  
1181  
1182  
1183  
1184  
1185  
1186  
1187  
1188  
1189  
1190  
1191  
1192  
1193  
1194  
1195  
1196  
1197  
1198  
1199  
1200  
1201  
1202  
1203  
1204  
1205  
1206  
1207  
1208  
1209  
1210  
1211  
1212  
1213  
1214  
1215  
1216  
1217  
1218  
1219  
1220  
1221  
1222  
1223  
1224  
1225  
1226  
1227  
1228  
1229  
1230  
1231  
1232  
1233  
1234  
1235  
1236  
1237  
1238  
1239  
1240  
1241  
1242  
1243  
1244  
1245  
1246  
1247  
1248  
1249  
1250  
1251  
1252  
1253  
1254  
1255  
1256  
1257  
1258  
1259  
1260  
1261  
1262  
1263  
1264  
1265  
1266  
1267  
1268  
1269  
1270  
1271  
1272  
1273  
1274  
1275  
1276  
1277  
1278  
1279  
1280  
1281  
1282  
1283  
1284  
1285  
1286  
1287  
1288  
1289  
1290  
1291  
1292  
1293  
1294  
1295  
1296  
1297  
1298  
1299  
1300  
1301  
1302  
1303  
1304  
1305  
1306  
1307  
1308  
1309  
1310  
1311  
1312  
1313  
1314  
1315  
1316  
1317  
1318  
1319  
1320  
1321  
1322  
1323  
1324  
1325  
1326  
1327  
1328  
1329  
1330  
1331  
1332  
1333  
1334  
1335  
1336  
1337  
1338  
1339  
1340  
1341  
1342  
1343  
1344  
1345  
1346  
1347  
1348  
1349  
1350  
1351  
1352  
1353  
1354  
1355  
1356  
1357  
1358  
1359  
1360  
1361  
1362  
1363  
1364  
1365  
1366  
1367  
1368  
1369  
1370  
1371  
1372  
1373  
1374  
1375  
1376  
1377  
1378  
1379  
1380  
1381  
1382  
1383  
1384  
1385  
1386  
1387  
1388  
1389  
1390  
1391  
1392  
1393  
1394  
1395  
1396  
1397  
1398  
1399  
1400  
1401  
1402  
1403  
1404  
1405  
1406  
1407  
1408  
1409  
1410  
1411  
1412  
1413  
1414  
1415  
1416  
1417  
1418  
1419  
1420  
1421  
1422  
1423  
1424  
1425  
1426  
1427  
1428  
1429  
1430  
1431  
1432  
1433  
1434  
1435  
1436  
1437  
1438  
1439  
1440  
1441  
1442  
1443  
1444  
1445  
1446  
1447  
1448  
1449  
1450  
1451  
1452  
1453  
1454  
1455  
1456  
1457  
1458  
1459  
1460  
1461  
1462  
1463  
1464  
1465  
1466  
1467  
1468  
1469  
1470  
1471  
1472  
1473  
1474  
1475  
1476  
1477  
1478  
1479  
1480  
1481  
1482  
1483  
1484  
1485  
1486  
1487  
1488  
1489  
1490  
1491  
1492  
1493  
1494  
1495  
1496  
1497  
1498  
1499  
1500  
1501  
1502  
1503  
1504  
1505  
1506  
1507  
1508  
1509  
1510  
1511  
1512  
1513  
1514  
1515  
1516  
1517  
1518  
1519  
1520  
1521  
1522  
1523  
1524  
1525  
1526  
1527  
1528  
1529  
1530  
1531  
1532  
1533  
1534  
1535  
1536  
1537  
1538  
1539  
1540  
1541  
1542  
1543  
1544  
1545  
1546  
1547  
1548  
1549  
1550  
1551  
1552  
1553  
1554  
1555  
1556  
1557  
1558  
1559  
1560  
1561  
1562  
1563  
1564  
1565  
1566  
1567  
1568  
1569  
1570  
1571  
1572  
1573  
1574  
1575  
1576  
1577  
1578  
1579  
1580  
1581  
1582  
1583  
1584  
1585  
1586  
1587  
1588  
1589  
1590  
1591  
1592  
1593  
1594  
1595  
1596  
1597  
1598  
1599  
1600  
1601  
1602  
1603  
1604  
1605  
1606  
1607  
1608  
1609  
1610  
1611  
1612  
1613  
1614  
1615  
1616  
1617  
1618  
1619  
1620  
1621  
1622  
1623  
1624  
1625  
1626  
1627  
1628  
1629  
1630  
1631  
1632  
1633  
1634  
1635  
1636  
1637  
1638  
1639  
1640  
1641  
1642  
1643  
1644  
1645  
1646  
1647  
1648  
1649  
1650  
1651  
1652  
1653  
1654  
1655  
1656  
1657  
1658  
1659  
1660  
1661  
1662  
1663  
1664  
1665  
1666  
1667  
1668  
1669  
1670  
1671  
1672  
1673  
1674  
1675  
1676  
1677  
1678  
1679  
1680  
1681  
1682  
1683  
1684  
1685  
1686  
1687  
1688  
1689  
1690  
1691  
1692  
1693  
1694  
1695  
1696  
1697  
1698  
1699  
1700  
1701  
1702  
1703  
1704  
1705  
1706  
1707  
1708  
1709  
1710  
1711  
1712  
1713  
1714  
1715  
1716  
1717  
1718  
1719  
1720  
1721  
1722  
1723  
1724  
1725  
1726  
1727  
1728  
1729  
1730  
1731  
1732  
1733  
1734  
1735  
1736  
1737  
1738  
1739  
1740  
1741  
1742  
1743  
1744  
1745  
1746  
1747  
1748  
1749  
1750  
1751  
1752  
1753  
1754  
1755  
1756  
1757  
1758  
1759  
1760  
1761  
1762  
1763  
1764  
1765  
1766  
1767  
1768  
1769  
1770  
1771  
1772  
1773  
1774  
1775  
1776  
1777  
1778  
1779  
1780  
1781  
1782  
1783  
1784  
1785  
1786  
1787  
1788  
1789  
1790  
1791  
1792  
1793  
1794  
1795  
1796  
1797  
1798  
1799  
1800  
1801  
1802  
1803  
1804  
1805  
1806  
1807  
1808  
1809  
1810  
1811  
1812  
1813  
1814  
1815  
1816  
1817  
1818  
1819  
1820  
1821  
1822  
1823  
1824  
1825  
1826  
1827  
1828  
1829  
1830  
1831  
1832  
1833  
1834  
1835  
1836  
1837  
1838  
1839  
1840  
1841  
1842  
1843  
1844  
1845  
1846  
1847  
1848  
1849  
1850  
1851  
1852  
1853  
1854  
1855  
1856  
1857  
1858  
1859  
1860  
1861  
1862  
1863  
1864  
1865  
1866  
1867  
1868  
1869  
1870  
1871  
1872  
1873  
1874  
1875  
1876  
1877  
1878  
1879  
1880  
1881  
1882  
1883  
1884  
1885  
1886  
1887  
1888  
1889  
1890  
1891  
1892  
1893  
1894  
1895  
1896  
1897  
1898  
1899  
1900  
1901  
1902  
1903  
1904  
1905  
1906  
1907  
1908  
1909  
1910  
1911  
1912  
1913  
1914  
1915  
1916  
1917  
1918  
1919  
1920  
1921  
1922  
1923  
1924  
1925  
1926  
1927  
1928  
1929  
1930  
1931  
1932  
1933  
1934  
1935  
1936  
1937  
1938  
1939  
1940  
1941  
1942  
1943  
1944  
1945  
1946  
1947  
1948  
1949  
1950  
1951  
1952  
1953  
1954  
1955  
1956  
1957  
1958  
1959  
1960  
1961  
1962  
1963  
1964  
1965  
1966  
1967  
1968  
1969  
1970  
1971  
1972  
1973  
1974  
1975  
1976  
1977  
1978  
1979  
1980  
1981  
1982  
1983  
1984  
1985  
1986  
1987  
1988  
1989  
1990  
1991  
1992  
1993  
1994  
1995  
1996  
1997  
1998  
1999  
2000  
2001  
2002  
2003  
2004  
2005  
2006  
2007  
2008  
2009  
2010  
2011  
2012  
2013  
2014  
2015  
2016  
2017  
2018  
2019  
2020  
2021  
2022  
2023  
2024  
2025  
2026  
2027  
2028  
2029  
2030  
2031  
2032  
2033  
2034  
2035  
2036  
2037  
2038  
2039  
2040  
2041  
2042  
2043  
2044  
2045  
2046  
2047  
2048  
2049  
2050  
2051  
2052  
2053  
2054  
2055  
2056  
2057  
2058  
2059  
2060  
2061  
2062  
2063  
2064  
2065  
2066  
2067  
2068  
2069  
2070  
2071  
2072  
2073  
2074  
2075  
2076  
2077  
2078  
2079  
2080  
2081  
2082  
2083  
2084  
2085  
2086  
2087  
2088  
2089  
2090  
2091  
2092  
2093  
2094  
2095  
2096  
2097  
2098  
2099  
2100  
2101  
2102  
2103  
2104  
2105  
2106  
2107  
2108  
2109  
2110  
2111  
2112  
2113  
2114  
2115  
2116  
2117  
2118  
2119  
2120  
2121  
2122  
2123  
2124  
2125  
2126  
2127  
2128  
2129  
2130  
2131  
2132  
2133  
2134  
2135  
2136  
2137  
2138  
2139  
2140  
2141  
2142  
2143  
2144  
2145  
2146  
2147  
2148  
2149  
2150  
2151  
2152  
2153  
2154  
2155  
2156  
2157  
2158  
2159  
2160  
2161  
2162  
2163  
2164  
2165  
2166  
2167  
2168  
2169  
2170  
2171  
2172  
2173  
2174  
2175  
2176  
2177  
2178  
2179  
2180  
2181  
2182  
2183  
2184  
2185  
2186  
2187  
2188  
2189  
2190  
2191  
2192  
2193  
2194  
2195  
2196  
2197  
2198  
2199  
2200  
2201  
2202  
2203  
2204  
2205  
2206  
2207  
2208  
2209  
2210  
2211  
2212  
2213  
2214  
2215  
2216  
2217  
2218  
2219  
2220  
2221  
2

1  
2  
3 about the factors that influence patient experiences with health care providers, it did not explore  
4 specifically experiences with physiotherapy care.  
5  
6

7  
8 Thus, the purpose of this qualitative study was to explore the experiences of people who had  
9 recently received physiotherapy care for their knee OA in Australia. Such information will help  
10 enhance our understanding of patient expectations about physiotherapy care for their condition and  
11 may help inform strategies to improve future care and service delivery.  
12  
13  
14  
15  
16

## 17 18 **Method**

### 19 20 *Design*

21  
22 This qualitative study was based on a constructivist paradigm, where knowledge is built through  
23 active experience and interpretation.(11) The Consolidated Criteria for Reporting Qualitative  
24 Research checklist was used to ensure explicit and comprehensive reporting of this study.(12)  
25  
26  
27  
28  
29

### 30 31 *Patient and public involvement*

32  
33 Patients or the public were not actively involved in the design, conduct, reporting or dissemination  
34 plans of our research.  
35  
36  
37  
38

### 39 40 *Participants*

41  
42 People who had sought physiotherapy care to manage their knee OA were recruited from around  
43 Australia via Facebook and our research volunteer database. Inclusion criteria for participants  
44 were: i) met the National Institute for Health and Care Excellence OA clinical criteria (1) (aged 45  
45 years or above, had activity-related knee pain and any knee-related morning stiffness lasted no  
46 longer than 30 minutes); and ii) consulted a physiotherapist about their knee OA in the prior 6  
47 months. Participants were excluded if they had self-reported inflammatory arthritis and/or had  
48  
49  
50  
51  
52  
53  
54  
55  
56



undergone knee replacement surgery for the affected knee. The final sample size was determined by the principles of data saturation, this being when no new themes emerged from the data.(13) Participants provided written informed consent and ethical approval was granted by the School of Health Sciences Human Ethics Advisory Group, University of Melbourne.

### Interviews

Semi-structured interview guides (Table 1) were developed, informed by the quality statements of the Australian Government's OA of the Knee Clinical Care Standard.(14) It defines seven domains of care that people with knee OA should expect to receive, regardless of where they are treated in Australia, spanning comprehensive assessment, diagnosis, education and self-management, weight loss and exercise, medications, regular review and surgical options for people with knee OA. Participants were reimbursed for their time with a \$50 gift card.

**Table 1: Semi-structured interview guide.**

| Topic                           | Question                                                                                                                                                                                                                                                                                                                                                                                                                                                                                                                                                                  |
|---------------------------------|---------------------------------------------------------------------------------------------------------------------------------------------------------------------------------------------------------------------------------------------------------------------------------------------------------------------------------------------------------------------------------------------------------------------------------------------------------------------------------------------------------------------------------------------------------------------------|
| <b>Introduction</b>             | 1) Can you tell me about your experiences attending physiotherapy for your knee osteoarthritis? <ul style="list-style-type: none"> <li>○ <i>What prompted you to seek physiotherapy care?</i></li> </ul>                                                                                                                                                                                                                                                                                                                                                                  |
|                                 | 2) Can you tell me, where did you see the physiotherapist(s)? <ul style="list-style-type: none"> <li>○ <i>How did you end up seeing a physiotherapist?</i></li> </ul>                                                                                                                                                                                                                                                                                                                                                                                                     |
| <b>Comprehensive assessment</b> | 3) Can you tell me how the physiotherapist assessed you and your knee problem? <ul style="list-style-type: none"> <li>○ <i>What sort of questions did the physiotherapist ask you?</i></li> <li>○ <i>What sort of physical examination did the physiotherapist do?</i></li> <li>○ <i>What other health conditions or social factors that might affect how you manage your knee pain (for example, changing work) did the physiotherapist assess?</i></li> <li>○ <i>What sort of questionnaire, survey or form did the physiotherapist ask you to complete?</i></li> </ul> |
|                                 | 4) What was the main problem you were seeing the physiotherapist for? <ul style="list-style-type: none"> <li>○ <i>How well did the physiotherapist understand the main problems you were experiencing for your knee?</i></li> </ul>                                                                                                                                                                                                                                                                                                                                       |
|                                 | 5) How did the physiotherapist decide that you have knee osteoarthritis? <ul style="list-style-type: none"> <li>○ <i>What sort of tests or scans did the physiotherapist order for your knee osteoarthritis?</i></li> <li>○ <i>How did the physiotherapist explain/help you to understand your diagnosis?</i></li> </ul>                                                                                                                                                                                                                                                  |
|                                 | 6) What sort of treatments did the physiotherapist give you for your knee osteoarthritis? <ul style="list-style-type: none"> <li>○ <i>Can you tell me if the physiotherapist provided you with any hands-on treatment or used any machine/device on your knee?</i></li> </ul>                                                                                                                                                                                                                                                                                             |

|                                   |                                                                                                                                                                                                                                                                                                                                                                             |
|-----------------------------------|-----------------------------------------------------------------------------------------------------------------------------------------------------------------------------------------------------------------------------------------------------------------------------------------------------------------------------------------------------------------------------|
|                                   | <ul style="list-style-type: none"> <li>○ <i>Can you tell me if the physiotherapist advised you on the use of knee brace, walking aid or taping for your knee problem?</i></li> </ul>                                                                                                                                                                                        |
|                                   | 7) Can you tell me what you remember about any information/advice you received from the physiotherapist for your knee osteoarthritis?                                                                                                                                                                                                                                       |
| <b>Weight loss &amp; exercise</b> | 8) What exercise did the physiotherapist suggest you try? <ul style="list-style-type: none"> <li>○ <i>How did the physiotherapist consider your needs and preferences when deciding on the best exercise program for you?</i></li> </ul>                                                                                                                                    |
|                                   | 9) Could you tell me if weight is an issue for you? If so, what weight loss treatment did the physiotherapist suggest you try?                                                                                                                                                                                                                                              |
|                                   | 10) Can you tell me if the physiotherapist discussed with you the importance of maintaining healthy body weight for your knee osteoarthritis?                                                                                                                                                                                                                               |
| <b>Medications</b>                | 11) Can you tell me if you are taking any medications to manage your knee osteoarthritis? <ul style="list-style-type: none"> <li>○ <i>Can you tell me if you asked the physiotherapist ways to manage your medications?</i></li> <li>○ <i>Is there a reason why you didn't ask the physiotherapist about medications for your knee?</i></li> </ul>                          |
|                                   | 12) What information/advice did the physiotherapist provide about medicines/drugs for your knee osteoarthritis? <ul style="list-style-type: none"> <li>○ <i>Can you tell me if the physiotherapist spoke about any injection you could get for your knee?</i></li> </ul>                                                                                                    |
| <b>Patient review</b>             | 13) Can you tell me how often you saw the physiotherapist for your knee problems? <ul style="list-style-type: none"> <li>○ <i>How many times did you see the physiotherapist for your knee?</i></li> <li>○ <i>How frequently do you see the physiotherapist now?</i></li> <li>○ <i>What did the physiotherapist advise you to do if your problems get worse?</i></li> </ul> |
|                                   | 14) Which other health professional did the physiotherapist recommend you see for your knee problem? <ul style="list-style-type: none"> <li>○ <i>How did you go with the recommendation?</i></li> </ul>                                                                                                                                                                     |
| <b>Surgery</b>                    | 15) Can you tell me if you have considered any sort of surgery for your knee osteoarthritis? <ul style="list-style-type: none"> <li>○ <i>Can you tell me if the physiotherapist asked you about your thoughts of having any knee surgery?</i></li> </ul>                                                                                                                    |
|                                   | 16) What information/advice did the physiotherapist provide about surgical treatments for your knee osteoarthritis?                                                                                                                                                                                                                                                         |
| <b>Concluding remarks</b>         | 17) Is there any other aspect about your physiotherapy care you would like to discuss?                                                                                                                                                                                                                                                                                      |
|                                   | 18) Do you have anything else to add?                                                                                                                                                                                                                                                                                                                                       |

Individual interviews were conducted via telephone by PLT, a female graduate research student and physiotherapist trained in qualitative methodologies. Telephone interviews were conducted to facilitate participation of people with knee OA from Australia (irrespective of geographical location) and to promote a perception of anonymity in interviewees.<sup>(15)</sup> Interviews were audio recorded and transcribed verbatim by an external provider. Pseudonyms were assigned to participants for confidentiality.

### *Data analysis*

1  
2  
3 An inductive thematic approach was used (16). First, the student researcher (PLT) and another  
4 post-doctoral researcher (BJL) with expertise in qualitative methodologies (and who is not a  
5 physiotherapist) individually read each transcript. Next, they re-read and inductively coded each  
6 transcript to identify topics and initial patterns of emerging ideas. They then compared codes and  
7 grouped similar topics/ideas into categories before organising them into broader themes and sub-  
8 themes. These were further reviewed and discussed with the broader research team (RSH, KLB,  
9 TE). The senior researcher (RSH) read all transcripts prior to discussion to ensure data credibility  
10 and confirmability. Analysis was performed using standard word processing software.(17)  
11  
12  
13  
14  
15  
16  
17  
18  
19  
20  
21

## 22 **Results**

23  
24 Table 2 describes the 24 participants interviewed. Three-quarters were female and the mean  
25 (standard deviation) age was 64 (10) years (range 49 to 81). Participants resided in all of  
26 Australia's six states and two territories. Most lived in major cities (79%), with some from outer  
27 regional (13%) or inner regional areas (8%). Most (67%) people reported less than five sessions  
28 of physiotherapy for their knee OA in the prior 6 months, some (25%) between five to nine and  
29 two (8%) reported ten or more sessions.  
30  
31  
32  
33  
34  
35  
36  
37  
38  
39

### 40 **Table 2: Characteristics of the patients (n=24).**

41  
42 PT: Physiotherapist

43 ACT: Australian Capital Territory; NSW: New South Wales; NT: Northern Territory; Qld: Queensland; SA: South Australia; TAS: Tasmania;  
44 Vic: Victoria; WA: Western Australia.

45 \*Classification based on residential postcode, in accordance with Australian Standard Geographical Classification.

46  
47 † Measured by 11-point numeric rating scale (0 = no pain, 10 = worst pain possible), where patients rated the average amount of their knee pain  
48 over the past week.

49  
50 ‡ Measured by Western Ontario and McMaster Universities Osteoarthritis Index (WOMAC), where pain scores range from 0 to 20 and physical  
51 function scores range from 0 to 68 (higher scores indicate worse pain/poorer function).

52  
53 § Number of physiotherapy sessions attended by patient for their knee osteoarthritis over the last six months

54  
55 ¶ Number of physiotherapist(s) consulted by patient for their knee osteoarthritis over the last six months  
56  
57  
58  
59  
60

Six themes emerged which are outlined in Table 3 and described below.

**Table 3: Themes, subthemes and exemplary quotes from the patient interviews.**

| <b>Theme 1: Presented with a pre-existing osteoarthritis diagnosis</b> |                                                                                                                                                                                                                                                                                                                                                                                                                                                                                                                                                                                                                                                                                                                                                                                                                                                                                                                                                                                                                                                                                                               |
|------------------------------------------------------------------------|---------------------------------------------------------------------------------------------------------------------------------------------------------------------------------------------------------------------------------------------------------------------------------------------------------------------------------------------------------------------------------------------------------------------------------------------------------------------------------------------------------------------------------------------------------------------------------------------------------------------------------------------------------------------------------------------------------------------------------------------------------------------------------------------------------------------------------------------------------------------------------------------------------------------------------------------------------------------------------------------------------------------------------------------------------------------------------------------------------------|
| <i>History of seeking care for osteoarthritis elsewhere</i>            | <p>Harry: "I got my MRI scan and I took it back to the doctor and it showed that I had osteoarthritis, that it was very inflamed, that my cruciate ligament resembled a celery stick and he got me to go to see the physio."</p> <p>Dominic: "My knees got really bad about last July and I went to see a surgeon with the possible view of having replacements done. The diagnosis for both knees were bone on bone. He didn't feel that I was severe enough to warrant surgery at that time, so on further discussion, he suggested that I go to physiotherapy to strengthen my legs. So, I went to a local physiotherapist."</p> <p>Jade: "I've had the experience with the osteoarthritis for about eight or nine years and first of all, I went to a knee specialist and then I went to a sports medicine specialist and orthopaedic surgeon. I did that for about eight or nine years and recently, I've been to a physiotherapist for the Good Life with osteoarthritis: Denmark (GLA:D) program*."</p>                                                                                                |
| <i>Perception of adequate OA knowledge</i>                             | <p>Alice: "I think I have a fairly good understanding of what osteoarthritis is. I understand that I have damage to the articular cartilage of my kneecap and medial femoral condyle. I have very little cartilage at all and that's rubbing. To be honest, I didn't need him [the physiotherapist] to explain all of that."</p> <p>Peter: "The physiotherapist saw the x-rays and they have training in interpreting x-rays like that for degenerative bone disease such as osteoarthritis, cartilage wear and things like that. I was well aware that I had osteoarthritis, so I don't think he did anything to explain the osteoarthritis because I was fairly well aware of what it was on about."</p> <p>Gordon: "It's just basically wear and tear, and it's really bone on bone. The surgeon explained it to me, too. He sat me down with him at his computer looking at the MRI. It's little fragments of bone and stuff that are rubbing against each other and disintegration of your bone in your patella plus around your knee. Because there's no blood flow in that area, it doesn't heal."</p> |
| <b>Theme 2: Varying models of physiotherapy care</b>                   |                                                                                                                                                                                                                                                                                                                                                                                                                                                                                                                                                                                                                                                                                                                                                                                                                                                                                                                                                                                                                                                                                                               |
| <i>Referral pathways</i>                                               | <p>Dylan: "Initially I went to the orthopaedic surgeon and it was deemed that surgery is inappropriate at the moment because of age and probably not severe enough to warrant a replacement. I [was referred by the surgeon to] the osteoarthritis [chronic care program]. The [osteoarthritis] chronic care program<sup>†</sup> was really an intermediary or, hopefully, a step to prevent requiring a knee replacement as such."</p> <p>Abby: "I mentioned to my doctor I'm getting these sore knees, she said, you should try Kieser<sup>‡</sup>. I knew it was up the road, my friend went there, and my doctor said it could be a good idea."</p> <p>Cathy: "I just chose them [the physiotherapy centre] because I knew they did Pilates and exercise rehab, so that's why I went there. And they were close to home."</p> <p>Ryan: "My doctor recommendation. I got on this Enhanced Primary Care Plan<sup>§</sup> where they recommend a physiotherapist."</p>                                                                                                                                       |

---

*Funding models*

Bianca: "I had an accident at work a few years ago. I suffered quite a bit of pain and I was referred to a specialist, and he did an arthroscopy. Then I was doing follow-up physiotherapy after the arthroscopy. The surgeon did another arthroscopy and I followed up with more physiotherapy - and started doing hydrotherapy under a physiotherapist. I was doing those sessions on a regular basis. WorkCover then ceased to cover me, and so I was doing them myself out-of-pocket."

Reese: "I went to my general practitioner and got the five treatments that you can get from the government for chronic illness. [With] the care plan you only get five treatments, but then I've got private health insurance, so I saw him under that as well."

Leanne: "I had ancillary benefits at that stage and I only got about five treatments covered by that ancillary benefits with Medibank Private. I couldn't afford the ancillary benefits anymore so, no, I won't go to a physio now."

---

*Individual vs group sessions*

Alice: "The most recent physio visit was with a new physio because I was having a bicycle fit, and as part of the bike fit the physio did a full-on assessment so he talked more about osteoarthritis as well. I've only seen him once."

Cathy: "I didn't see an individual physio for individual sessions in the last six months. I was always in group sessions. It's a general fitness class but it's mainly for menopausal age group. So, everyone has their own set of problems. It's not tailored just for one problem; it's tailored for everyone."

Dominic: "I went to a local physiotherapist and they did sort of two sessions of assessment. And then I started going to regular weekly classes."

Jade: "Recently this year, I've been to a physiotherapist for the GLA:D\* program. As part of the GLA:D\* program, we had to do an education program and so she [the physiotherapist] showed us a diagram of the knee and explained how different things get worn out and rough. There were six different exercises in the GLA:D\* program."

---

**Theme 3: Varied reasons for seeking physiotherapy care**

---

*Knee symptoms*

Abby: "My knees were becoming sorer and clicking as I walked, particularly up sets of stairs. And I have a lot of stairs at work. So, I thought I need to go and talk to a physio about it."

Kate: "I had an ongoing knee problem and the pain was just killing me. I would be in tears with the pain. I went to the doctor; they were giving me anti-inflammatory tablets, they were not working. So, I said is there anything I can do, will physio help, and the doctor sent a referral to the physio."

Cathy: "Well, it was for knee pain that I wanted to go and build-up the strength in my legs to try and avoid surgery. I've lost capacity to squat and things like that; I've lost a lot of strength in my right leg and my legs have become quite bowed."

---

*Functional problems*

Leanne: "I think she understood what my concerns were that I couldn't get upstairs. I couldn't drive the car because of the clutch and the knee pain. She looked at all those things and helped me with them."

Maggie: "I told her [the physiotherapist] that my foot turns in. I also told her that my knee crunches. I can manage the pain but going up and down stairs is one of the problems that I've got."

---

Ryan: “Well I told him [the physiotherapist], I said, look, I just want to get back surfing properly and snowboarding and skiing. I said I realise I’m 72 years old and it’s not going to be easy and they said, oh no, no problem we can do it.”

---

#### **Theme 4: Physiotherapist management focussed on function and exercise**

---

##### *Assessment of function*

Dylan: “Timing or just observing, getting in and out of a chair. Walking a set distance, I think it might have been like 100 metres and they time that. And then, there was going up and down stairs and they had some sort of a measurement with that. Then, over time would repeat that and see if there was any improvement.”

Abby: “He watched me from a seated position to standing. He looked at my movements. We went out the back and I did a lot of walking up and down, and they had a staircase of about three or four steps, and he watched where the pain happened there. He had me practicing, in particular, the way I walk up and down stairs to make sure that through my feet, I was balancing the weight and not throwing to one side.”

Dominic: “They were measuring how far I could bend my legs laying down and standing up. Squats. Doing steps. They found that I was bending knees. I wasn’t walking correctly, but I was doing that to relieve the pain. They got me stepping up correctly with a straight leg. I think she made a record of all of her findings and then set these exercises to hopefully relieve some of the pain and strengthen my leg muscles.”

---

##### *Various types of exercises prescribed*

Abby: “He gave me an exercise program, just some gentle swinging of the knee initially, and then I built it up to other types of exercise. He had me practicing the way I walk up and down stairs, then we looked at me doing some kicking, gentle kicking with the board and gentle deep water running as opposed to doing the structured classes.”

Dominic: “Other than exercise machines that they had in-house, there was elastic stretching band and she told me to do elliptical trainer at home and a cycle machine. I’ve got a list here. Its straight leg raise, bridging, clams, ball squeezes, sit to stand, lunges, calf raises ballet style, step-ups, go on the bike, and balance exercise.”

Cathy: “I was doing Pilates, then I was doing Fit-Right classes. We did lots of clams with weights and off-weights. I did a lot of [reformer] where I sat on a spring-loaded box.”

---

##### *Surgery, medications, and injections are for doctors*

Dylan: “I think it’s the rheumatologist or my general practitioner who would be issuing the drugs so I didn’t think that would be physio. I don’t think meds ever really was their [the physiotherapists’] jurisdiction.”

Ryan: “The physio doesn’t want to go into the drug side of it because of the risks. Why would he change it as regards something as serious as drugs? I’d had second thoughts and the fact that I thought they’d [a surgeon] done the wrong knee. He didn’t go into that because obviously that’s not part of his remit.”

Reese: “The surgeon will know better about how advanced it is and I’ve got a lot of faith in him. He can give me a better idea of where I should proceed after this. Because I’ve had it before, I have got a fairly good idea of what the process will be.”

---

##### *Adjunctive treatments*

Harry: “I couldn’t bend the knee very well; I was in real pain and he gave me a couple of needle sessions both hot and dry needles. He massaged the knee; he did a lot to try and bend the knee.”

---



Gordon: "It's a little bit of ultrasound, but basically manipulation. I'm always tight in the hamstring. I play lawn bowls, and if it was niggly, I drop in the physio and say listen, could you tape my knee for me, please, and they do it for me straight away."

Alice: "I did get a bit of massage and a trigger point treatment to help alleviate that. We also tried, I think it's called EMS machine, an electronic stimulation machine, to try and build the muscle at one point because my kneecap was so aggravated."

---

### Theme 5: Happy and satisfied with physiotherapy

---

*Trust and/or confidence* Harry: "I thought he was excellent. He was one of the best physiotherapists I've ever seen in my life. His approach to everything, his care. Many of them can be in and out, I'm finished with you, I've only got so much time for you. None of that. He was extremely good, and I had complete trust in what he was doing. And when he did hurt me it wasn't because he wanted to hurt me, he said, oh I'm sorry and tell me if that's too hard."

Leanne: "I thought she was really good. I think she understood what my concerns were that I couldn't get upstairs. I couldn't drive the car because of the clutch and the knee pain. She looked at all those things and helped me with them."

Reese: "When he gave them to me, they all seemed quite logical because I know nothing, I wouldn't know what was good or bad for me. I trusted him because I had the condition before when my knee was bad. He also knew my background and what I'd been through, so that was good to have that kind of long-term relationship."

---

*Personalized care* Kate: "I had a good say in it because every time she suggested something she would ask. With appointment times, she would always check, 'Is this a good time for you?' Every time she suggested a treatment, she would ask me. She was always checking back with me."

Alice: "I think he has a very good understanding of my knee problem and I think he understands that better than my doctors, because he's worked side by side with me, he's supported me, it's more intimate. He's been keen to help resolve the problems, rather than doing, what I call a supermarket shelf, one size fits all program. He's really worked hard to try and work out what's best in my circumstance."

Millie: "My physiotherapist knows me well. I've been seeing him for some time, he seems to know where my problems lie. He spent the time to look at other areas which because of my osteoarthritis in my knee, I was having problems with. So at least he looked at all those areas, so I was happy with that. He came up with a few suggestions on how he would approach it, and then we went from there."

---

### Theme 6: Belief that surgery is inevitable

---

Bianca: "I was told by my surgeon a few years ago that it would be likely I would need a knee replacement. They don't like to do it until it's absolutely necessary. He kept telling me I was too young. They like to wait until you're so old you might die under the knife or you don't get long enough to enjoy the freedom of your new knee."

Reese: "I am going to go to the orthopaedic specialist in February to have a look and see whether I should have a replacement. Part of me is thinking "Just go and have it done." I should just bite the bullet and do it while I'm young enough, you know?"

---

---

Sandy: "I'm on a waiting list to have a knee replacement. We know that the waiting list is fairly long, so I'll keep myself as healthy and fit as I possibly can, so that I'm able to get through this okay."

Peter: "Things like osteoarthritis and physiotherapy, there is only so much that physiotherapy can do. If it's bone on bone that doesn't replace the cartilage. All that physiotherapy can do is prescribe activities and exercises to help ameliorate the impact of the osteoarthritis because osteoarthritis doesn't go away. I've had arthroscopies on my knees, so there's no cartilage there. But I'm reluctant to have knee replacements."

---

\*Good Life with Osteoarthritis: Denmark (GLA:D) is an education and exercise program developed in Denmark for people with hip/knee osteoarthritis. The program has been adapted and delivered by physiotherapists in Australia and comprises of an initial assessment, twelve supervised group exercise sessions, two group education sessions and a follow-up assessment.<sup>19</sup>

†The Osteoarthritis Chronic Care Program (OACCP) is a multidisciplinary model of care developed in New South Wales, Australia for people with hip/knee osteoarthritis, specifically those awaiting elective joint replacement surgery. The program is a public-health initiative in tertiary hospitals and offers conservative management, including programs for exercise and weight loss, self-management advice, psychological and pharmacological reviews and disease management education.<sup>18</sup>

‡Kieser is a strength training program using specific equipment and was originally developed in Switzerland. The program was adapted and delivered by physiotherapists in Australia in Kieser training centres.<sup>20</sup>

§The Enhanced Primary Care Plan is a former term for a program now called a Chronic Disease Management Plan, which is a Medicare subsidised program enabling general practitioners to refer patients with a chronic medical condition to a maximum of five allied health services (including physiotherapists) per calendar year.<sup>21</sup>

### *Theme 1: Presented with a pre-existing OA diagnosis*

Participants tended to have a diagnosis of knee OA already made by a doctor prior to their physiotherapy consultation and did not seek physiotherapists to take on a diagnostic role. They often brought knee imaging results with them to the physiotherapy consultation. Some expected physiotherapists to access imaging results from their general practitioners. Participants described a range of other health professionals they had consulted for their knee problems before consulting a physiotherapist, such as a general practitioner, rheumatologist, orthopaedic surgeon and/or sports medicine physician.

Participants generally perceived their pre-existing knowledge and understanding about OA to be adequate. They had typically acquired their knowledge from personal experience and/or from conversations with healthcare professionals prior to them seeking physiotherapy care. Often, knowledge about OA was constructed from imaging (e.g. x-ray) results. Participants often



1  
2  
3 described their OA with phrases such as ‘wear and tear’, ‘bone on bone’, ‘degenerative’ and/or  
4  
5 ‘cartilage wear’. Participants tended not to seek validation or confirmation of their knowledge  
6  
7 about OA from their physiotherapist, nor seek further education.  
8  
9

### 10 11 *Theme 2: Varying models of physiotherapy care*

12  
13 Participants accessed physiotherapy through a variety of care models, including consultations at  
14  
15 private physiotherapy practices, participation in programs specifically developed for OA  
16  
17 management delivered in the public (e.g. Osteoarthritis Chronic Care Program(18)) and private  
18  
19 (Good Life with Osteoarthritis Denmark (GLA:D(19)) healthcare settings, participation in more  
20  
21 generic strengthening-based programs (e.g. Kieser(20)), hydrotherapy and/or generic exercise  
22  
23 classes (e.g. Pilates/gym). Most were referred by their general practitioners or other medical  
24  
25 specialists but some “self-referred” to a local physiotherapist. Participants chose their  
26  
27 physiotherapist by convenience (e.g. physiotherapist located in the same medical practice as their  
28  
29 general practitioner or located close to home), by following a recommendation from their friend  
30  
31 or doctor, or based on prior experience (e.g. previously consulted the physiotherapist for other  
32  
33 musculoskeletal conditions and/or their knee problem).  
34  
35  
36  
37  
38

39 Participant attendance at physiotherapy services often relied on funding being available to  
40  
41 subsidise cost of care. Some participants described accessing physiotherapy in public hospital  
42  
43 settings (e.g. Osteoarthritis Chronic Care Program(18)), some received Medicare rebates for  
44  
45 physiotherapy services in the private sector (e.g. via Chronic Disease Management Plans(21)),  
46  
47 whilst others were subsidised through their private health insurance or other regulatory body (such  
48  
49 as worker compensation schemes). A few participants paid out-of-pocket to cover their  
50  
51 physiotherapy costs. Participants often ceased their physiotherapy visits because funding ran out.  
52  
53  
54  
55  
56

1  
2  
3 Participants received physiotherapy care via individual consultations and/or via group sessions.  
4  
5 Some participants attended one-on-one consultations several times before transitioning to a group  
6  
7 setting. Most described undergoing an individual assessment with the physiotherapist, including  
8  
9 those who ultimately participated in group classes. People referred to physiotherapy under the  
10  
11 Chronic Disease Management Plan typically attended individual physiotherapy sessions up to five  
12  
13 times.  
14  
15

### 16 17 18 *Theme 3: Varied reasons for seeking physiotherapy care*

19  
20 Participants spoke about their knee symptoms as a major driver of seeking care, including ongoing  
21  
22 knee pain, swelling, clicking and muscle weakness. They expressed frustration with the pain they  
23  
24 experienced, particularly when it made them unable to move the knee or walk properly. Words  
25  
26 such as ‘click’, ‘crunch’ or ‘crack’ were commonly used to describe other symptoms. Participants  
27  
28 spoke about feeling weak around their knees, which caused their knee to ‘give way’ or ‘collapse’.  
29  
30 Participants also sought care because of difficulties with functional activities such as walking,  
31  
32 driving, getting in/out of the bed/chair/toilet/shower, negotiating steps and squatting. Some  
33  
34 participants avoided doing sports/recreational activities (e.g. cycling, surfing, running, swimming)  
35  
36 for fear of exacerbating pain. Many people expected physiotherapists to provide treatments to  
37  
38 relieve the pain and assist with building knee strength, as well as helping them to return to activities  
39  
40 they previously enjoyed or were now unable to do.  
41  
42  
43  
44  
45

### 46 47 *Theme 4: Physiotherapist management focused on function and exercise*

48  
49 The physiotherapist typically assessed functional ability, including walking, squatting, getting  
50  
51 in/out of a chair and negotiating stairs. Some participants were timed when performing functional  
52  
53 tests, and others were asked to repeat the tests as they progressed through their treatment sessions.  
54  
55  
56

1  
2  
3 Participants consistently described exercise as a key component of their physiotherapy  
4 consultations. They received advice about different types of exercises for their OA, including  
5 strengthening, cardiovascular, stretching, balance and functional movement programs. Some  
6 participants were instructed to use exercise equipment such as elastic resistance bands and/or  
7 weights to progress the intensity of the exercises. For those who were given home exercise  
8 programs, exercise handouts or online instructions were provided. Some participants also attended  
9 supervised group exercise classes such as gym or fitness-based program, Pilates, hydrotherapy,  
10 balance and/or strengthening classes.  
11  
12

13  
14  
15  
16  
17  
18  
19  
20  
21  
22 Participants tended not to expect information about surgery, medications and knee injections from  
23 their physiotherapist, instead considering these domains of care as a doctor's responsibility. Many  
24 did not see the need for physiotherapists to cover these options further and some participants felt  
25 that physiotherapists should refrain from providing any medication advice because they do not  
26 have prescription rights.  
27  
28  
29  
30  
31  
32  
33

34  
35  
36  
37  
38  
39  
40  
41  
42  
43  
44  
45  
46  
47  
48  
49  
50  
51  
52  
53  
54  
55  
56  
57  
58  
59  
60

Some participants received adjunctive treatments from physiotherapists such as massage, dry  
needling/acupuncture and manual knee mobilisation techniques to relieve muscle tightness and  
joint stiffness. Transcutaneous electrical nerve stimulation and electronic muscle stimulator  
machines were sometimes provided to relieve knee pain and stimulate muscles respectively. Other  
common adjunctive treatments offered by physiotherapists included ultrasound, heat/cold pack,  
taping and using a knee brace. These were typically delivered during individual physiotherapy  
consultations.

*Theme 5: Happy and satisfied with physiotherapy*

1  
2  
3 Generally, most participants were happy and satisfied with the physiotherapy care they received.  
4  
5 Some described having trust in their physiotherapists, both in their clinical skills and professional  
6  
7 knowledge when managing knee OA. Most felt that their physiotherapist understood and  
8  
9 appreciated the problems they were experiencing, and some were impressed that the  
10  
11 physiotherapist was able to identify what was ‘going on’ with their knees. Participants were also  
12  
13 confident that their physiotherapists could help them by providing practical advice and/or  
14  
15 strategies to overcome their specific problems.  
16  
17

18  
19  
20 Participants valued the highly personalised care they received and felt that physiotherapists  
21  
22 generally provided care that was tailored to their needs. They spoke about their physiotherapist as  
23  
24 being empathetic and understanding towards their condition/circumstances. Some felt that their  
25  
26 physiotherapist ‘knew them well’, which enabled the physiotherapist to provide the care and  
27  
28 support they desired/needed. Others highlighted the value of working collaboratively with their  
29  
30 physiotherapist and appreciated having a ‘two-way discussion’, where the participant was asked  
31  
32 for their input in devising a treatment plan for their OA. When care was not personalised,  
33  
34 participants expressed a sense of disappointment, describing the treatment received as a ‘sausage  
35  
36 factory’, ‘supermarket shelf’, or being a ‘one size fits all program’  
37  
38  
39  
40

#### 41 *Theme 6: Belief that surgery is inevitable*

42  
43

44 Participants perceived that joint replacement surgery was inevitable for their knee problems. Many  
45  
46 were informed of this by their doctor and some were already on hospital waiting lists for surgery.  
47  
48 However, participants were also advised by their doctors/surgeons to delay surgery for as long as  
49  
50 possible and some attended the physiotherapist in an effort to achieve this. Participants generally  
51  
52 believed that physiotherapists were not able to ‘cure’ OA but could help in reducing its impact.  
53  
54  
55  
56

1  
2  
3 Some described the role of physiotherapy as providing them with strategies to strengthen the knees  
4 and alleviate their OA symptoms in order to delay surgery. Whilst some participants 'prepared'  
5 their knee for surgery by seeing a physiotherapist, others were keen to have surgery as soon as  
6 possible.  
7  
8  
9  
10  
11  
12

### 13 **Discussion**

14  
15  
16 This qualitative study explored experiences of people who had received physiotherapy care for  
17 their knee OA in Australia. Participants were generally happy and satisfied with their  
18 physiotherapy care and described having a strong sense of trust and/or confidence in their  
19 physiotherapist. They felt that physiotherapists understood their problems and they appreciated  
20 being offered the personalised care that most physiotherapists tended to provide. These findings  
21 are consistent with previous research, which showed that patient satisfaction with physiotherapy  
22 care for a range of musculoskeletal conditions was generally high in Australia and other countries  
23 such as those in Northern Europe, North America, the United Kingdom and Ireland.(22)  
24  
25 Physiotherapists' interpersonal and communication skills are important attributes to high patient  
26 satisfaction.(22) Our findings suggest that, generally, Australian physiotherapists work in a  
27 patient-centred way to ensure that patients' treatment expectations, needs and preferences are  
28 respected.  
29  
30  
31  
32  
33  
34  
35  
36  
37  
38  
39  
40  
41  
42  
43

44 Participants utilised various referral pathways and a range of different funding models to access  
45 physiotherapy care through a diverse array of service delivery options. This suggests that there is  
46 not a single 'one size fits all' model of physiotherapy care that will suit the needs and individual  
47 circumstances of all Australians living with knee OA. Our findings highlight how important it is  
48 for healthcare systems to offer different models of physiotherapy care, in both the public and  
49  
50  
51  
52  
53  
54  
55  
56

---

1  
2  
3 private sectors, for example, spanning individual consultations through to group exercise classes.  
4  
5 This helps to reduce inequity of access to physiotherapy care for people with knee OA, which may  
6  
7 arise from geographical location or socioeconomic status.(23) Indeed, a community-based survey  
8  
9 of 1000 people with arthritis in Australia found that over two thirds of respondents felt that they  
10  
11 did not cope well with their condition because of the health care they experienced, and felt that  
12  
13 they had poor access to medical doctors, specialists and allied health professionals.(24) Allowing  
14  
15 patients the flexibility to choose which type of physiotherapy service best suits their needs,  
16  
17 preferences and financial situation also aligns with a philosophy of patient-centred care,(25, 26)  
18  
19 and permits the patient to have some control over their own health care.  
20  
21  
22  
23

24 Our findings highlight how reliant people with knee OA are on government-funded health care  
25  
26 and/or third-party payers (such as private health insurers) to fund their physiotherapy care.  
27  
28 Participants predominantly accessed and received care from physiotherapists in private practice  
29  
30 settings and typically ceased physiotherapy when funding ran out and they were required to pay  
31  
32 out-of-pocket for services. These findings are consistent with key Australian policy documents,  
33  
34 including the National Osteoarthritis Strategy,(27) that have called for expansion of funding to  
35  
36 support OA care delivery, including care delivered by physiotherapists.(28) Given the chronicity  
37  
38 of knee OA, regular reviews and follow-up are advocated to allow for monitoring of symptoms,  
39  
40 permit timely changes to management, and to support effective self-management.(1) However,  
41  
42 similar to a previous study in Australia,(29) the costs associated with physiotherapy treatments  
43  
44 were identified by our participants as an important barrier to continuing to access physiotherapy  
45  
46 care for OA. Our findings highlight the importance of funding mechanisms for physiotherapy  
47  
48 services to relieve the financial burden that people experience when accessing necessary care for  
49  
50 knee OA.  
51  
52  
53  
54  
55  
56

1  
2  
3 Although pain was one of the important drivers of care-seeking in our participants, many also  
4  
5 desired help from the physiotherapist to maintain or improve muscle strength and physical  
6  
7 function. These findings highlight the need for physiotherapists to co-develop (with the patient) a  
8  
9 multi-faceted management plan that does not only focus on pain relief strategies but also  
10  
11 incorporates interventions that target strength and assist patients to engage in activities that are  
12  
13 meaningful to them. It is thus not surprising that participants in our study described the important  
14  
15 role that physiotherapists played in prescribing personalised exercise and addressing functional  
16  
17 deficits. A systematic review of patients' perceived health service needs for OA also showed that  
18  
19 one of the key reasons patients typically consulted physiotherapists was for exercise  
20  
21 advice/prescription.(5) Our patient perspectives about the important role that physiotherapists play  
22  
23 in prescribing exercise align with the perspectives of general practitioners,(30, 31) who often refer  
24  
25 patients with chronic knee pain to physiotherapists for exercise. General practitioners describe lack  
26  
27 of time as the most common barrier for them to initiate exercise with their patients, preferring  
28  
29 instead to refer their patient to a physiotherapist.(30, 32) Similarly, physiotherapists themselves  
30  
31 also perceived exercise and physical activity to be their main role in the management of people  
32  
33 with knee OA(7) and are confident to prescribe exercises to improve knee strength and range of  
34  
35 movement.(8)  
36  
37  
38  
39  
40  
41  
42

43 Interestingly, participants believed that they already had adequate knowledge and understanding  
44  
45 about their knee OA and did not seek further information from their physiotherapist. This was  
46  
47 despite the fact that participants appeared to have different perceptions about knee OA (describing  
48  
49 it as 'wear and tear', 'bone on bone', 'degenerative' and/or 'cartilage wear') and their belief that  
50  
51 surgery is an inevitable consequence. These perceptions and beliefs about OA are similar to  
52  
53 findings from another study exploring reasons why patients resorted to surgical interventions for  
54  
55  
56

1  
2  
3 knee OA.(33) Once the participants in that study had been "diagnosed" with "bone-on-bone"  
4 changes, many disregarded exercise-based interventions (which they believed would damage their  
5 joint) in favour of alternative and experimental treatments (which they believed would help  
6 regenerate lost cartilage). In order to maximise success with exercise interventions, these findings  
7 suggest that physiotherapists could consider reframing their conversations to actively invite the  
8 patient to share their pre-existing knowledge about OA so that any perceptions may be subtly  
9 corrected, and evidence-based educational resources shared.  
10  
11  
12  
13  
14  
15  
16  
17  
18  
19

20 Participants also did not expect physiotherapists to provide them with information regarding  
21 medications, knee injections and surgery even though these topics are advocated as important  
22 responsibilities of all health professionals when managing OA.(1, 34) Instead, participants  
23 generally approached their medical doctors for advice in these domains of care. This is likely  
24 because, in Australia, physiotherapists can only provide advice about over-the-counter  
25 medications and do not have prescribing rights. In terms of surgery, patients are only entitled to  
26 rebate under the Government-funded Medicare scheme for any surgical procedure if they are  
27 directly referred by their general practitioners.(35)  
28  
29  
30  
31  
32  
33  
34  
35  
36  
37  
38

39 Some participants received adjunctive treatments from their physiotherapist, such as massage,  
40 acupuncture and electrotherapy interventions despite limited evidence to support their use.(1, 3,  
41 36) We do not know if participants specifically requested these treatments and/or if their  
42 physiotherapist helped the participant to make an informed treatment decision by discussing their  
43 limited treatment efficacy for knee OA. Patients with other musculoskeletal conditions, such as  
44 low back pain, often present to physiotherapists with pre-conceived ideas about physiotherapy  
45 treatment,(37) and may desire 'hands-on' treatment or any intervention that has previously eased  
46  
47  
48  
49  
50  
51  
52  
53  
54  
55  
56



1  
2  
3 their back symptoms. Physiotherapists may feel obliged to provide treatments with limited efficacy  
4  
5 in order to meet the patient's treatment expectation.  
6  
7

8 A strength of our study was its qualitative design, which allowed us to explore the experiences of  
9  
10 people receiving physiotherapy care for knee OA in Australia. In order to explore diversity in  
11  
12 experiences, we interviewed a range of participants, including males and females of differing age,  
13  
14 occupational status and geographical location across Australia. Our study also has limitations.  
15  
16 Participants responded to advertisements (social media) and/or email invitations (research  
17  
18 volunteer database) to participate and thus our sample may be biased towards those who had  
19  
20 favourable experiences with physiotherapy and/or were successful at accessing physiotherapy. Our  
21  
22 sample was constrained to participants who could speak English and given that 21% of Australians  
23  
24 speak a language other than English at home,(38) we do not know if our findings reflect the  
25  
26 experiences of people from culturally and linguistically diverse backgrounds. Furthermore,  
27  
28 physiotherapists are a primary contact health profession in Australia so patient experiences with  
29  
30 physiotherapy care for knee OA may be different in other countries where people can only access  
31  
32 a physiotherapist on referral. Future research is particularly warranted in low to middle income  
33  
34 countries, given that social factors such as education level and income influence patient access to  
35  
36 allied health services such as physiotherapy.(39) Our findings may also not be applicable in  
37  
38 countries where cultural beliefs differ considerably from the Australian context. The perception of  
39  
40 pain, health beliefs and concept of disability and its management often vary from one culture to  
41  
42 another(40) and thus may influence patients' experiences managing their conditions.  
43  
44  
45  
46  
47  
48  
49

50 In conclusion, our findings provide evidence from the patient's perspective about the important  
51  
52 role physiotherapists play in the care of Australians with knee OA, reinforcing the need for  
53  
54 equitable access to physiotherapy services that are supported by a range of funding models.  
55  
56

---

1  
2  
3 Findings highlight the importance of different pathways for accessing care to meet the needs of  
4 individuals and ensure that all people with knee OA are adequately supported in managing their  
5 condition.  
6  
7  
8  
9  
10  
11  
12  
13  
14  
15  
16  
17  
18  
19  
20  
21  
22  
23  
24

### 25 **Contributors**

26  
27  
28 PLT, KLB, KSD and RSH contributed to the study conception and design. PLT completed data  
29 collection. PLT, LBJ and RSH contributed to the data analysis and interpretation of data. PLT  
30 wrote the first draft of the manuscript. All authors revised the paper and provided scientific input.  
31  
32  
33 All authors approved the final version of the manuscript.  
34  
35  
36  
37

### 38 **Role of the funding source**

39  
40  
41 This work was supported by funding from the National Health and Medical Research Council  
42 (Centre of Research Excellence; number 1079078). Ms Teo is supported by a PhD stipend from  
43 the Australian Government Research Training Program Scholarship. Professor Hinman is  
44 supported by a National Health and Medical Research Council Fellowship (#1154217). Professor  
45  
46  
47  
48  
49  
50  
51  
52  
53  
54  
55  
56  
57  
58  
59  
60

---

For peer review only - <http://bmjopen.bmj.com/site/about/guidelines.xhtml>

1  
2  
3 Knowledge Mobilisation Research Fellowship (KMRF- 2014-03-002) from the NIHR and is an  
4  
5 NIHR Senior Investigator. The funders had no role in the development of the study method,  
6  
7 interpretation of the results or reporting.  
8  
9

### 10 **Conflict of interest**

11  
12  
13 The authors declare that they have no competing interests.  
14  
15  
16  
17  
18  
19  
20  
21  
22  
23  
24

### 25 **References:**

- 26  
27  
28  
29 1. NICE. Clinical guideline: Osteoarthritis care and management in adults. United  
30  
31 Kingdom: National Institute for Health and Care Excellence; 2014.  
32  
33 2. Bannuru RR, Osani MC, Vaysbrot EE, et al. OARSI guidelines for the non-surgical  
34  
35 management of knee, hip, and polyarticular osteoarthritis. *Osteoarthritis Cartilage*.  
36  
37 2019;27(11):1578-89.  
38  
39 3. Kolasinski SL, Neogi T, Hochberg MC, et al. 2019 American College of  
40  
41 Rheumatology/Arthritis Foundation guideline for the management of osteoarthritis of the hand,  
42  
43 hip, and knee. *Arthritis Rheumatol*. 2020;72(2):220-33.  
44  
45 4. Australian Institute of Health and Welfare. Use of health services for arthritis and  
46  
47 osteoporosis. Canberra; 2010.  
48  
49  
50  
51  
52  
53  
54  
55  
56

- 1  
2  
3 5. Papandony MC, Chou L, Seneviwickrama M, et al. Patients' perceived health service  
4 needs for osteoarthritis (OA) care: A scoping systematic review. *Osteoarthritis Cartilage*.  
5  
6 2017;25(7):1010-25.  
7
- 8  
9  
10 6. Dobson F, Bennell KL, French SD, et al. Barriers and facilitators to exercise participation  
11 in people with hip and/or knee osteoarthritis: Synthesis of the literature using behavior change  
12 theory. *Am J Phys Med Rehabil*. 2016;95(5):372-89.  
13  
14
- 15  
16  
17 7. MacKay C, Hawker GA, Jaglal SB. How do physical therapists approach management of  
18 people with early knee osteoarthritis? A qualitative study. *Phys Ther*. 2020;100(2):295-306.  
19  
20
- 21  
22 8. Tang CY, Pile R, Croft A, et al. Exploring physical therapist adherence to clinical  
23 guidelines when treating patients with knee osteoarthritis in Australia: A mixed methods study.  
24  
25  
26  
27 *Phys Ther*. 2020.
- 28  
29 9. Spitaels D, Vankrunkelsven P, Desfosses J, et al. Barriers for guideline adherence in knee  
30 osteoarthritis care: A qualitative study from the patients' perspective. *J Eval Clin Pract*.  
31  
32  
33 2017;23(1):165-72.  
34
- 35  
36 10. Wallis JA, Taylor NF, Bunzli S, et al. Experience of living with knee osteoarthritis: A  
37 systematic review of qualitative studies. *BMJ Open*. 2019;9(9):e030060.  
38  
39
- 40  
41 11. Baxter P, Jack S. Qualitative case study methodology: Study design and implementation  
42 for novice researchers. *Qual Rep*. 2008;13:544+.  
43  
44
- 45  
46 12. Tong A, Sainsbury P, Craig J. Consolidated criteria for reporting qualitative research  
47 (COREQ): A 32-item checklist for interviews and focus groups. *Int J Qual Health Care*.  
48  
49  
50 2007;19(6):349-57.
- 51  
52 13. Moser A, Korstjens I. Series: Practical guidance to qualitative research. Part 3: Sampling,  
53 data collection and analysis. *Eur J Gen Pract*. 2018;24(1):9-18.  
54  
55  
56

- 1  
2  
3 14. Australian Commission on Safety and Quality in Health Care. Osteoarthritis of the Knee  
4  
5 Clinical Care Standard Sydney: ACSQHC 2017 [Available from:  
6  
7 [https://www.safetyandquality.gov.au/wp-content/uploads/2018/04/Osteoarthritis-of-the-knee-](https://www.safetyandquality.gov.au/wp-content/uploads/2018/04/Osteoarthritis-of-the-knee-Clinical-Care-Standard.pdf)  
8  
9 [Clinical-Care-Standard.pdf](https://www.safetyandquality.gov.au/wp-content/uploads/2018/04/Osteoarthritis-of-the-knee-Clinical-Care-Standard.pdf).  
10  
11
- 12 15. Judith ES, Kathleen JH. Comparing telephone and face-to-face qualitative interviewing:  
13  
14 A research note. *Qual Res*. 2004;4(1):107-18.  
15  
16
- 17 16. Morse JM, Field P-A. Qualitative research methods for health professionals. 2nd ed.:  
18  
19 Sage Publications; 1995.  
20  
21
- 22 17. Lawford BJ, Delany C, Bennell KL, et al. "I was really sceptical...But it worked really  
23  
24 well": A qualitative study of patient perceptions of telephone-delivered exercise therapy by  
25  
26 physiotherapists for people with knee osteoarthritis. *Osteoarthritis Cartilage*. 2018;26(6):741-50.  
27  
28
- 29 18. Arthritis Australia. Time to move: Osteoarthritis Australia 2014 [Available from:  
30  
31 [http://www.arthritisaustralia.com.au/images/stories/documents/reports/TTM/Final%20Arthritis%](http://www.arthritisaustralia.com.au/images/stories/documents/reports/TTM/Final%20Arthritis%20Aus%20Time%20to%20Move_OA_140618.pdf)  
32  
33 [20Aus%20Time%20to%20Move\\_OA\\_140618.pdf](http://www.arthritisaustralia.com.au/images/stories/documents/reports/TTM/Final%20Arthritis%20Aus%20Time%20to%20Move_OA_140618.pdf).  
34  
35
- 36 19. La Trobe University. GlA:D Australia La Trobe University 2017 [Available from:  
37  
38 <https://gladaustralia.com.au/>.  
39
- 40 20. Kieser Australia. About Kieser South Melbourne 2020 [Available from:  
41  
42 <https://www.kieser.com.au/about-kieser/>.  
43  
44
- 45 21. Australian Government Department of Health. Chronic disease management - individual  
46  
47 allied health services under medicare - patient information 2014 [Available from:  
48  
49 [http://www.health.gov.au/internet/main/publishing.nsf/Content/health-medicare-allied-health-](http://www.health.gov.au/internet/main/publishing.nsf/Content/health-medicare-allied-health-brochure.htm)  
50  
51 [brochure.htm](http://www.health.gov.au/internet/main/publishing.nsf/Content/health-medicare-allied-health-brochure.htm).  
52  
53  
54  
55  
56

- 1  
2  
3 22. Hush JM, Yung V, Mackey M, et al. Patient satisfaction with musculoskeletal  
4  
5 physiotherapy care in Australia: An international comparison. *J Man Manip Ther*.  
6  
7 2012;20(4):201-8.  
8  
9  
10 23. Bath B, Jakubowski M, Mazzei D, et al. Factors associated with reduced perceived access  
11  
12 to physiotherapy services among people with low back disorders. *Physiother Can*.  
13  
14 2016;68(3):260-6.  
15  
16  
17 24. Arthritis Australia. The ignored majority: The voice of arthritis 2011 Australia 2011  
18  
19 [Available from:  
20  
21 [http://www.arthritisaustralia.com.au/images/stories/documents/reports/2011\\_updates/the%20vo](http://www.arthritisaustralia.com.au/images/stories/documents/reports/2011_updates/the%20voice%20of%20arthritis%202011.pdf)  
22  
23 [ice%20of%20arthritis%202011.pdf](http://www.arthritisaustralia.com.au/images/stories/documents/reports/2011_updates/the%20voice%20of%20arthritis%202011.pdf).  
24  
25  
26 25. Brand CA, Ackerman IN, Bohensky MA, et al. Chronic disease management: A review  
27  
28 of current performance across quality of care domains and opportunities for improving  
29  
30 osteoarthritis care. *Rheum Dis Clin North Am*. 2013;39(1):123-43.  
31  
32  
33 26. Institute of Medicine. Crossing the quality chasm. [electronic resource] : A new health  
34  
35 system for the 21st century: Washington, D.C: National Academy Press; 2001.  
36  
37  
38 27. National Osteoarthritis Strategy Project Group. National osteoarthritis strategy NSW2018  
39  
40 [Available from:  
41  
42 [http://www.acsep.org.au/content/Document/National\\_OA\\_Strategy\\_PostSummit.pdf](http://www.acsep.org.au/content/Document/National_OA_Strategy_PostSummit.pdf).  
43  
44  
45 28. Victorian Musculoskeletal Clinical Leadership Group. Victorian model of care for  
46  
47 osteoarthritis of the hip and knee. Melbourne MOVE muscle, bone & joint health; 2018.  
48  
49  
50 29. Ackerman IN, Livingston JA, Osborne RH. Personal perspectives on enablers and  
51  
52 barriers to accessing care for hip and knee osteoarthritis. *Phys Ther*. 2016;96(1):26-36.  
53  
54  
55  
56  
57  
58  
59  
60

- 1  
2  
3 30. Cottrell E, Foster NE, Porcheret M, et al. GPs' attitudes, beliefs and behaviours regarding  
4 exercise for chronic knee pain: A questionnaire survey. *BMJ Open*. 2017;7(6):e014999.  
5  
6  
7 31. Egerton T, Nelligan RK, Setchell J, et al. General practitioners' views on managing knee  
8 osteoarthritis: A thematic analysis of factors influencing clinical practice guideline  
9 implementation in primary care. *BMC Rheumatol*. 2018;2:30.  
10  
11  
12 32. Egerton T, Diamond LE, Buchbinder R, et al. A systematic review and evidence  
13 synthesis of qualitative studies to identify primary care clinicians' barriers and enablers to the  
14 management of osteoarthritis. *Osteoarthritis Cartilage*. 2017;25(5):625-38.  
15  
16  
17 33. Bunzli S, O'Brien BP, Ayton D, et al. Misconceptions and the acceptance of evidence-  
18 based nonsurgical interventions for knee osteoarthritis. A qualitative study. *Clin Orthop Relat*  
19 *Res*. 2019;477(9):1975-83.  
20  
21  
22 34. Hinman RS, Allen KD, Bennell KL, et al. Development of a core capability framework  
23 for qualified health professionals to optimise care for people with osteoarthritis: An OARSI  
24 initiative. *Osteoarthritis Cartilage*. 2020;28(2):154-66.  
25  
26  
27 35. Australian Medical Association. Medicare requirements for referrals to specialists and  
28 consultant physicians ACT 2019 [Available from: <https://ama.com.au/article/medicare-requirements-referrals-specialists-and-consultant-physicians>.  
29  
30  
31  
32  
33  
34  
35  
36  
37  
38  
39  
40  
41  
42 36. Royal Australian College of General Practitioners. Guideline for the management of knee  
43 and hip osteoarthritis East Melbourne, Victoria: RACGP; 2018. Contract No.: 28 February  
44 2020.  
45  
46  
47  
48  
49 37. Foster NE, Delitto A. Embedding psychosocial perspectives within clinical management  
50 of low back pain: Integration of psychosocially informed management principles into physical  
51 therapist practice--challenges and opportunities. *Phys Ther*. 2011;91(5):790-803.  
52  
53  
54  
55  
56

- 1  
2  
3 38. 2016 census: Multicultural [press release]. Australia2016.  
4  
5 39. Ackerman IN, Busija L. Access to self-management education, conservative treatment  
6 and surgery for arthritis according to socioeconomic status. *Best Pract Res Clin Rheumatol*.  
7 2012;26(5):561-83.  
8  
9  
10 40. Henschke N, Lorenz E, Pokora R, et al. Understanding cultural influences on back pain  
11 and back pain research. *Best Pract Res Clin Rheumatol*. 2016;30(6):1037-49.  
12  
13  
14  
15  
16  
17  
18  
19  
20  
21  
22  
23  
24  
25  
26  
27  
28  
29  
30  
31  
32  
33  
34  
35  
36  
37  
38  
39  
40  
41  
42  
43  
44  
45  
46  
47  
48  
49  
50  
51  
52  
53  
54  
55  
56  
57  
58  
59  
60



# BMJ Open

## Patient experiences with physiotherapy for knee osteoarthritis in Australia – a qualitative study

|                                 |                                                                                                                                                                                                                                                                                                  |
|---------------------------------|--------------------------------------------------------------------------------------------------------------------------------------------------------------------------------------------------------------------------------------------------------------------------------------------------|
| Journal:                        | <i>BMJ Open</i>                                                                                                                                                                                                                                                                                  |
| Manuscript ID                   | bmjopen-2020-043689.R1                                                                                                                                                                                                                                                                           |
| Article Type:                   | Original research                                                                                                                                                                                                                                                                                |
| Date Submitted by the Author:   | 15-Dec-2020                                                                                                                                                                                                                                                                                      |
| Complete List of Authors:       | Teo, Pek Ling; The University of Melbourne, Bennell, Kim; University of Melbourne, CHESM Lawford, Belinda; The University of Melbourne Egerton, T; University of Melbourne, Dziedzic, Krysia; Arthritis Research Campaign National Primary Care Centre Hinman, Rana S.; University of Melbourne, |
| <b>Primary Subject Heading</b>: | Qualitative research                                                                                                                                                                                                                                                                             |
| Secondary Subject Heading:      | Rheumatology                                                                                                                                                                                                                                                                                     |
| Keywords:                       | Adult orthopaedics < ORTHOPAEDIC & TRAUMA SURGERY, Musculoskeletal disorders < ORTHOPAEDIC & TRAUMA SURGERY, QUALITATIVE RESEARCH                                                                                                                                                                |
|                                 |                                                                                                                                                                                                                                                                                                  |

SCHOLARONE™  
Manuscripts

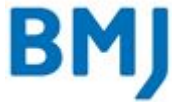

I, the Submitting Author has the right to grant and does grant on behalf of all authors of the Work (as defined in the below author licence), an exclusive licence and/or a non-exclusive licence for contributions from authors who are: i) UK Crown employees; ii) where BMJ has agreed a CC-BY licence shall apply, and/or iii) in accordance with the terms applicable for US Federal Government officers or employees acting as part of their official duties; on a worldwide, perpetual, irrevocable, royalty-free basis to BMJ Publishing Group Ltd ("BMJ") its licensees and where the relevant Journal is co-owned by BMJ to the co-owners of the Journal, to publish the Work in this journal and any other BMJ products and to exploit all rights, as set out in our [licence](#).

The Submitting Author accepts and understands that any supply made under these terms is made by BMJ to the Submitting Author unless you are acting as an employee on behalf of your employer or a postgraduate student of an affiliated institution which is paying any applicable article publishing charge ("APC") for Open Access articles. Where the Submitting Author wishes to make the Work available on an Open Access basis (and intends to pay the relevant APC), the terms of reuse of such Open Access shall be governed by a Creative Commons licence – details of these licences and which [Creative Commons](#) licence will apply to this Work are set out in our licence referred to above.

Other than as permitted in any relevant BMJ Author's Self Archiving Policies, I confirm this Work has not been accepted for publication elsewhere, is not being considered for publication elsewhere and does not duplicate material already published. I confirm all authors consent to publication of this Work and authorise the granting of this licence.

1  
2  
3 **1 Title: Patient experiences with physiotherapy for knee osteoarthritis in Australia – a**  
4  
5 **2 qualitative study**  
6  
7

8 Pek Ling Teo, BPhysio, MHSc<sup>1</sup>, Kim L. Bennell, BAppSci (Physio), PhD<sup>1</sup>, Belinda J. Lawford,  
9  
10 BMedSci, BHlthSci(Hons), PhD<sup>1</sup>, Thorlene Egerton, BPhy, PhD<sup>1</sup>, Krysia S. Dziedzic,  
11  
12 GradDipPhys, PhD<sup>2</sup>, Rana S. Hinman, BPhysio (Hons), PhD<sup>1</sup>  
13  
14  
15

16 <sup>1</sup>Centre for Health, Exercise and Sports Medicine, Department of Physiotherapy, School of Health  
17  
18 Sciences, The University of Melbourne, Victoria, Australia  
19  
20

21 <sup>2</sup>Impact Accelerator Unit, School of Medicine, Keele University, Keele, Staffordshire, ST5 5BG,  
22  
23 UK  
24  
25

26  
27 **Address correspondence to:**  
28

29 Rana Hinman,  
30  
31 Centre for Health, Exercise & Sports Medicine, Department of Physiotherapy, Office 708, Level  
32  
33 7, Alan Gilbert Building, Building 104, 161 Barry Street, The University of Melbourne, Victoria  
34  
35 3010. T: +61 3 8344 3223. [ranash@unimelb.edu.au](mailto:ranash@unimelb.edu.au)  
36  
37

38 **Email addresses:** Pek Ling Teo [plteo@student.unimelb.edu.au](mailto:plteo@student.unimelb.edu.au)  
39  
40 Kim Bennell [k.bennell@unimelb.edu.au](mailto:k.bennell@unimelb.edu.au)  
41  
42 Belinda Lawford [belinda.lawford@unimelb.edu.au](mailto:belinda.lawford@unimelb.edu.au)  
43  
44 Thorlene Egerton [thorlene.egerton@unimelb.edu.au](mailto:thorlene.egerton@unimelb.edu.au)  
45  
46 Krysia Dziedzic [k.s.dziedzic@keele.ac.uk](mailto:k.s.dziedzic@keele.ac.uk)  
47  
48  
49

50 **Word count:** 4347  
51

52  
53 **Key words:** qualitative research, physiotherapy, knee osteoarthritis, exercise, patient experience.  
54  
55

56  
57  
58  
59  
60

## 23 **Abstract**

24 *Objective:* Physiotherapists commonly provide non-surgical care for people with knee  
25 osteoarthritis (OA). It is unknown if patients are receiving high-quality physiotherapy care for their  
26 knee OA. This study aimed to explore the experiences of people who had recently received  
27 physiotherapy care for their knee OA in Australia and how these experiences aligned with the  
28 national Clinical Care Standard for knee OA.

29 *Design:* Qualitative study using semi-structured individual telephone interviews and thematic  
30 analysis, where themes/subthemes were inductively derived. Questions were informed by seven  
31 quality statements of the OA of the Knee Clinical Care Standard. Interview data were also  
32 deductively analysed according to the Standard.

33 *Setting:* Participants were recruited from around Australia via Facebook and our research volunteer  
34 database.

35 *Participants:* Interviews were conducted with twenty-four people with recent experience receiving  
36 physiotherapy care for their knee OA. They were required to be aged 45 years or above, had  
37 activity-related knee pain and any knee-related morning stiffness lasted no longer than 30 minutes.  
38 Participants were excluded if they had self-reported inflammatory arthritis and/or had undergone  
39 knee replacement surgery for the affected knee.

40 *Results:* Six themes emerged: 1) Presented with a pre-existing osteoarthritis diagnosis (prior OA  
41 care from other health professionals; perception of adequate OA knowledge); 2) Wide variation in  
42 access and provision of physiotherapy care (referral pathways; funding models; individual vs  
43 group sessions); 3) Seeking physiotherapy care for pain and functional limitations (knee  
44 symptoms; functional problems); 4) Physiotherapy management focussed on function and exercise

1  
2  
3 45 (assessment of function; various types of exercises prescribed; surgery, medications, and injections  
4  
5 46 are for doctors; adjunctive treatments); 5) Professional and personalized care (trust and/or  
6  
7 47 confidence; personalized care); and 6) Physiotherapy to postpone or prepare for surgery.  
8  
9

10 48 *Conclusion:* Patients' experiences with receiving physiotherapy care for their knee OA were partly  
11  
12 49 aligned with the Standard, particularly regarding comprehensive assessment, self-management,  
13  
14 50 and exercise.  
15  
16  
17

## 18 51

### 21 52 **Strengths and limitations of this study**

- 24 53 • A strength of this study was using a qualitative design to explore how the experiences of people  
25  
26 54 receiving physiotherapy care for knee OA in Australia aligned with the national Clinical Care  
27  
28 55 Standard.
- 31 56 • A range of participants was interviewed, including males and females of differing age,  
32  
33 57 occupational status, and geographical location across Australia.
- 36 58 • Participants responded to advertisements and/or email invitations to participate and thus our  
37  
38 59 sample may be biased towards those who had favourable experiences with physiotherapy  
39  
40 60 and/or were successful at accessing physiotherapy.
- 43 61 • Our sample was constrained to participants who could speak English so may not represent the  
44  
45 62 experiences of people from culturally and linguistically diverse backgrounds.
- 47 63 • Physiotherapists are a primary contact health profession in Australia so patient experiences  
48  
49 64 with physiotherapy care for knee OA may be different in other countries where people can  
50  
51 65 only access a physiotherapist on referral.  
52  
53  
54  
55  
56  
57  
58  
59  
60

1  
2  
3 67 Knee osteoarthritis (OA) is highly prevalent and a leading cause of pain and disability worldwide.  
4  
5 68 (1) Clinical guidelines advocate non-surgical interventions such as exercise, weight loss (for  
6  
7  
8 69 people who are overweight or obese) and education regarding self-management as first line  
9  
10 70 treatments for knee OA,(1-3) Physiotherapists are important providers of non-surgical care for  
11  
12 71 people with knee OA and receive more OA referrals from general practitioners than other allied  
13  
14 72 health providers.(4) In addition, patients generally perceive physiotherapists to be important to  
15  
16 73 assist them in managing their OA and prescribing exercises.(5, 6)  
17  
18  
19  
20 74 To date, there are indications that physiotherapy care provided to people with knee OA may not  
21  
22 75 necessarily align with evidence-based care standards. We recently conducted a qualitative study  
23  
24 76 to explore the experiences of Australian physiotherapists delivering care for people with knee OA  
25  
26 77 and how their experiences aligned with the national Clinical Care Standard.(7) The Clinical Care  
27  
28 78 Standard for knee OA defines seven key aspects of care that people with knee OA should expect  
29  
30 79 to receive in Australia.(8) We found physiotherapists tended to rely on biomedically-oriented  
31  
32 80 assessment and would often provide treatment (such as manual therapy) and self-management  
33  
34 81 strategies that aimed to address the ‘mechanical’ aspects of knee OA. The primary focus for  
35  
36 82 physiotherapists was to provide goal-orientated personalised exercise. Surgery was perceived as a  
37  
38 83 last resort, and patient comorbidity, adherence, and desire for a ‘quick fix’ were the main clinical  
39  
40 84 challenges experienced. Physiotherapists also described a mismatch between what they knew and  
41  
42 85 what they did when it came to imaging, weight management and manual therapy. Weight loss,  
43  
44 86 medication and surgical advice were perceived to be outside of their scope of practice.  
45  
46 87 Nevertheless, physiotherapists’ reported experiences were mostly consistent with the quality care  
47  
48 88 standard.(7) Findings from this study provide useful information about physiotherapy management  
49  
50  
51  
52  
53  
54  
55  
56  
57  
58  
59  
60

1  
2  
3 89 of people with knee OA but it can be argued that a patient's perspective of their physiotherapy  
4  
5 90 care experiences may not necessarily be similar to that of the therapist.  
6  
7

8 91 Several qualitative studies have explored patient experiences of receiving care for their knee OA  
9  
10 92 from either a multidisciplinary team which included physiotherapists (9-14) or solely from  
11  
12 93 physiotherapists.(15-19) However, none of these studies have specifically explored patient  
13  
14 94 experiences receiving physiotherapy assessment, diagnosis, treatment options and follow-up  
15  
16 95 appointments for their knee OA. This study is complementary to our previous similar qualitative  
17  
18 96 study with physiotherapists as participants.(7) In the present study, we aim to explore the  
19  
20 97 experiences of Australians who had recently received physiotherapy care for their knee OA and  
21  
22 98 how these experiences aligned with the national Clinical Care Standard for knee OA. Such  
23  
24 99 information will help enhance our understanding of patient experiences with physiotherapy care  
25  
26 100 for their condition and may help inform strategies to improve future care and service delivery.  
27  
28  
29  
30

## 31 32 101 **Method**

### 33 34 35 102 *Design*

36  
37  
38 103 This qualitative study used semi-structured interviews and was based on a constructivist paradigm,  
39  
40 104 where knowledge is built through active experience and interpretation.(20) Qualitative methods  
41  
42 105 allow for in-depth examination of the attitudes, experiences, and behaviours of individuals in their  
43  
44 106 natural context and can contribute to a broader understanding of medical research.(21-23) The  
45  
46 107 Standards for Reporting Qualitative Research checklist was used to ensure explicit and  
47  
48 108 comprehensive reporting of this study.(24)  
49  
50

### 51 52 109 *Patient and public involvement*

1  
2  
3 110 Patients or the public were not actively involved in the design, conduct, reporting or dissemination  
4  
5 111 plans of our research.  
6

7  
8 112 *Participants*  
9

10  
11 113 A convenience sample of adults who had sought physiotherapy care to manage their knee OA were  
12  
13 114 recruited from around Australia via Facebook and our research volunteer database. Inclusion  
14  
15 115 criteria for participants were: i) met the National Institute for Health and Care Excellence OA  
16  
17 116 clinical criteria (1) (aged 45 years or above, had activity-related knee pain and any knee-related  
18  
19 117 morning stiffness lasted no longer than 30 minutes); and ii) consulted a physiotherapist about their  
20  
21 118 knee OA in the prior 6 months. Participants were excluded if they had self-reported inflammatory  
22  
23 119 arthritis and/or had undergone knee replacement surgery for the affected knee. The final sample  
24  
25 120 size was determined by the principles of data saturation, this being when no new themes emerged  
26  
27 121 from the data.(25) Participants provided written informed consent and ethical approval was granted  
28  
29 122 by the School of Health Sciences Human Ethics Advisory Group, University of Melbourne.  
30  
31 123 Interviews were conducted between December 2019 and January 2020.  
32  
33  
34  
35

36  
37 124 *Interviews*  
38  
39

40 125 Semi-structured interview guides (Table 1) were developed, informed by the quality statements of  
41  
42 126 the Australian Government's OA of the Knee Clinical Care Standard.(8) It defines seven domains  
43  
44 127 of care that people with knee OA should expect to receive, regardless of where they are treated in  
45  
46 128 Australia, spanning comprehensive assessment, diagnosis, education and self-management, weight  
47  
48 129 loss and exercise, medications, regular review and surgical options for people with knee OA.  
49  
50 130 Participants were reimbursed for their time with a \$50 gift card.  
51  
52  
53

54  
55 131 **Table 1: Semi-structured interview guide.**  
56  
57



| Topic                                                                                                                                 | Question                                                                                                                                                                                                                                                                                                                                                                                                                                                                                                                                                                  |
|---------------------------------------------------------------------------------------------------------------------------------------|---------------------------------------------------------------------------------------------------------------------------------------------------------------------------------------------------------------------------------------------------------------------------------------------------------------------------------------------------------------------------------------------------------------------------------------------------------------------------------------------------------------------------------------------------------------------------|
| Introduction                                                                                                                          | 1) Can you tell me about your experiences attending physiotherapy for your knee osteoarthritis? <ul style="list-style-type: none"> <li>○ <i>What prompted you to seek physiotherapy care?</i></li> </ul>                                                                                                                                                                                                                                                                                                                                                                  |
|                                                                                                                                       | 2) Can you tell me, where did you see the physiotherapist(s)? <ul style="list-style-type: none"> <li>○ <i>How did you end up seeing a physiotherapist?</i></li> </ul>                                                                                                                                                                                                                                                                                                                                                                                                     |
| Comprehensive assessment                                                                                                              | 3) Can you tell me how the physiotherapist assessed you and your knee problem? <ul style="list-style-type: none"> <li>○ <i>What sort of questions did the physiotherapist ask you?</i></li> <li>○ <i>What sort of physical examination did the physiotherapist do?</i></li> <li>○ <i>What other health conditions or social factors that might affect how you manage your knee pain (for example, changing work) did the physiotherapist assess?</i></li> <li>○ <i>What sort of questionnaire, survey or form did the physiotherapist ask you to complete?</i></li> </ul> |
|                                                                                                                                       | 4) What was the main problem you were seeing the physiotherapist for? <ul style="list-style-type: none"> <li>○ <i>How well did the physiotherapist understand the main problems you were experiencing for your knee?</i></li> </ul>                                                                                                                                                                                                                                                                                                                                       |
|                                                                                                                                       | 5) How did the physiotherapist decide that you have knee osteoarthritis? <ul style="list-style-type: none"> <li>○ <i>What sort of tests or scans did the physiotherapist order for your knee osteoarthritis?</i></li> <li>○ <i>How did the physiotherapist explain/help you to understand your diagnosis?</i></li> </ul>                                                                                                                                                                                                                                                  |
|                                                                                                                                       | 6) What sort of treatments did the physiotherapist give you for your knee osteoarthritis? <ul style="list-style-type: none"> <li>○ <i>Can you tell me if the physiotherapist provided you with any hands-on treatment or used any machine/device on your knee?</i></li> <li>○ <i>Can you tell me if the physiotherapist advised you on the use of knee brace, walking aid or taping for your knee problem?</i></li> </ul>                                                                                                                                                 |
| 7) Can you tell me what you remember about any information/advice you received from the physiotherapist for your knee osteoarthritis? |                                                                                                                                                                                                                                                                                                                                                                                                                                                                                                                                                                           |
| Weight loss & exercise                                                                                                                | 8) What exercise did the physiotherapist suggest you try? <ul style="list-style-type: none"> <li>○ <i>How did the physiotherapist consider your needs and preferences when deciding on the best exercise program for you?</i></li> </ul>                                                                                                                                                                                                                                                                                                                                  |
|                                                                                                                                       | 9) Could you tell me if weight is an issue for you? If so, what weight loss treatment did the physiotherapist suggest you try?                                                                                                                                                                                                                                                                                                                                                                                                                                            |
|                                                                                                                                       | 10) Can you tell me if the physiotherapist discussed with you the importance of maintaining healthy body weight for your knee osteoarthritis?                                                                                                                                                                                                                                                                                                                                                                                                                             |
| Medications                                                                                                                           | 11) Can you tell me if you are taking any medications to manage your knee osteoarthritis? <ul style="list-style-type: none"> <li>○ <i>Can you tell me if you asked the physiotherapist ways to manage your medications?</i></li> <li>○ <i>Is there a reason why you didn't ask the physiotherapist about medications for your knee?</i></li> </ul>                                                                                                                                                                                                                        |
|                                                                                                                                       | 12) What information/advice did the physiotherapist provide about medicines/drugs for your knee osteoarthritis? <ul style="list-style-type: none"> <li>○ <i>Can you tell me if the physiotherapist spoke about any injection you could get for your knee?</i></li> </ul>                                                                                                                                                                                                                                                                                                  |
| Patient review                                                                                                                        | 13) Can you tell me how often you saw the physiotherapist for your knee problems? <ul style="list-style-type: none"> <li>○ <i>How many times did you see the physiotherapist for you knee?</i></li> <li>○ <i>How frequently do you see the physiotherapist now?</i></li> <li>○ <i>What did the physiotherapist advise you to do if your problems get worse?</i></li> </ul>                                                                                                                                                                                                |
|                                                                                                                                       | 14) Which other health professional did the physiotherapist recommend you see for your knee problem? <ul style="list-style-type: none"> <li>○ <i>How did you go with the recommendation?</i></li> </ul>                                                                                                                                                                                                                                                                                                                                                                   |
|                                                                                                                                       | 15) Can you tell me if you have considered any sort of surgery for your knee osteoarthritis? <ul style="list-style-type: none"> <li>○ <i>Can you tell me if the physiotherapist asked you about your thoughts of having any knee surgery?</i></li> </ul>                                                                                                                                                                                                                                                                                                                  |
|                                                                                                                                       | 16) What information/advice did the physiotherapist provide about surgical treatments for your knee osteoarthritis?                                                                                                                                                                                                                                                                                                                                                                                                                                                       |

---

|                           |                                                                                        |
|---------------------------|----------------------------------------------------------------------------------------|
| <b>Concluding remarks</b> | 17) Is there any other aspect about your physiotherapy care you would like to discuss? |
|                           | 18) Do you have anything else to add?                                                  |

---

132

133 Individual interviews were conducted via telephone by PLT, a female graduate research student  
134 and physiotherapist trained in qualitative methodologies. Telephone interviews were conducted to  
135 facilitate participation of people with knee OA from Australia (irrespective of geographical  
136 location) and to promote a perception of anonymity in interviewees.(26) Interview questions were  
137 refined following the first three phone interviews to improve clarity for participants based on  
138 experience from the initial interviews. The refinement also helped to enhance/expand the prompts  
139 to ensure rich information were collected from the participants. Interviews were audio recorded  
140 and transcribed verbatim by an external provider.

#### 141 *Data analysis*

142 An inductive thematic approach was used initially.(27) In order to minimise over-representation,  
143 two researchers conducted the data analysis simultaneously. Following Morse et al's approach to  
144 inductive thematic analysis (which advocates for four steps: 1) read and re-read interview  
145 transcripts; 2) step back and reflect on interviews as a whole; 3) identify ideas of similar nature 4)  
146 group ideas into themes),(27) firstly, the student researcher (PLT) and another post-doctoral  
147 researcher (BJL) with expertise in qualitative methodologies (and who is not a physiotherapist)  
148 individually read each transcript. Next, they re-read and inductively coded each transcript to  
149 identify topics and initial patterns of emerging ideas. They then compared codes and grouped  
150 similar topics/ideas into categories before organising them into broader themes and sub-themes.  
151 The interview data were also deductively analysed according to the national Clinical Care

1  
2  
3 152 Standard for knee OA. These were further reviewed and discussed with the broader research team  
4  
5 153 (RSH, KLB, TE). The senior researcher (RSH) read all transcripts prior to discussion to ensure  
6  
7 154 data credibility and confirmability. Analysis was performed using standard word processing  
8  
9 155 software.(17)  
10  
11  
12

## 13 156 **Results**

16 157 Seventy-six participants responded to the interview invitation but only 31 fulfilled the eligibility  
17  
18 158 criteria for this study. Of the 31 eligible participants, 24 completed the interview while the  
19  
20 159 remaining either declined participation or were not contactable. Table 2 describes the 24  
21  
22 160 participants interviewed. Three-quarters were female, and the mean (standard deviation) age was  
23  
24 161 64 (10) years (range 49 to 81). Participants resided in all of Australia's six states and two territories.  
25  
26 162 Most lived in major cities (79%), with some from outer regional (13%) or inner regional areas  
27  
28 163 (8%). Most (67%) people reported less than five sessions of physiotherapy for their knee OA in  
29  
30 164 the prior 6 months, some (25%) between five to nine and two (8%) reported ten or more sessions.  
31  
32  
33  
34

35 165 **Table 2: Characteristics of the patients (n=24).**

|                               | Mean (SD) or n (%) |
|-------------------------------|--------------------|
| <b>Female</b>                 | 18 (75%)           |
| <b>Age (years)</b>            | 63.5 (9.8)         |
| <b>State</b>                  |                    |
| -Australian Capital Territory | 2 (8%)             |
| -New South Wales              | 5 (21%)            |
| -Northern Territory           | 1 (4%)             |
| -Queensland                   | 2 (8%)             |
| -South Australia              | 2 (8%)             |
| -Tasmania                     | 1 (4%)             |
| -Victoria                     | 8 (33%)            |

|    |                                                       |             |
|----|-------------------------------------------------------|-------------|
| 1  |                                                       |             |
| 2  |                                                       |             |
| 3  |                                                       |             |
| 4  | -Western Australia                                    | 3 (13%)     |
| 5  | <b>Geographical location*</b>                         |             |
| 6  |                                                       |             |
| 7  | -Major cities                                         | 19 (79%)    |
| 8  | -Inner regional                                       | 2 (8%)      |
| 9  |                                                       |             |
| 10 | -Outer regional                                       | 3 (13%)     |
| 11 |                                                       |             |
| 12 | <b>Education level</b>                                |             |
| 13 |                                                       |             |
| 14 | -Three years or more of high school                   | 5 (21%)     |
| 15 | -Some tertiary training                               | 5 (21%)     |
| 16 |                                                       |             |
| 17 | -Graduated from university or polytechnic             | 7 (29%)     |
| 18 | -Any post-graduate study                              | 7 (29%)     |
| 19 |                                                       |             |
| 20 | <b>Work status</b>                                    |             |
| 21 |                                                       |             |
| 22 | -Work full-time                                       | 3 (13%)     |
| 23 | -Work part-time                                       | 7 (29%)     |
| 24 |                                                       |             |
| 25 | -Unable to work due to health reasons                 | 3 (13%)     |
| 26 | -Retired (not due to health reasons)                  | 11 (46%)    |
| 27 |                                                       |             |
| 28 | <b>Knee pain severity<sup>†</sup></b>                 | 5.7 (1.9)   |
| 29 |                                                       |             |
| 30 | <b>Pain (WOMAC)<sup>‡</sup></b>                       | 6.8 (3.0)   |
| 31 |                                                       |             |
| 32 | <b>Physical function (WOMAC)<sup>‡</sup></b>          | 22.1 (10.5) |
| 33 |                                                       |             |
| 34 | <b>Number of physiotherapy sessions<sup>§</sup></b>   |             |
| 35 |                                                       |             |
| 36 | -4 or less                                            | 16 (67%)    |
| 37 | -5 to 9                                               | 6 (25%)     |
| 38 | -10 or more                                           | 2 (8%)      |
| 39 |                                                       |             |
| 40 | <b>Number of physiotherapist(s) seen<sup>  </sup></b> | 1.1 (0.3)   |

41 166 SD: standard deviation

42 167 n: number of participants

43 168 \*Classification based on residential postcode, in accordance with Australian Standard  
44 169 Geographical Classification.

45 170 † Measured by 11-point numeric rating scale (0 = no pain, 10 = worst pain possible), where patients  
46 171 rated the average amount of their knee pain over the past week.

47 172 ‡ Measured by Western Ontario and McMaster Universities Osteoarthritis Index (WOMAC),  
48 173 where pain scores range from 0 to 20 and physical function scores range from 0 to 68 (higher  
49 174 scores indicate worse pain/poorer function).

50 175 § Number of physiotherapy sessions attended by patient for their knee osteoarthritis over the last  
51 176 six months

52 177 || Number of physiotherapist(s) consulted by patient for their knee osteoarthritis over the last six  
53 178 months

1  
2  
3 179 Six themes emerged following the inductive thematic analysis.(27) An audit trail of evidence  
4  
5 180 showing examples of each stage of the data analysis is presented in Supplementary file 1. The six  
6  
7  
8 181 themes identified are outlined in Table 3 and described below.  
9

10  
11 182 **Table 3: Themes, subthemes and exemplary quotes from the patient interviews.**

| <b>Theme 1: Presented with a pre-existing osteoarthritis diagnosis</b>       |                                                                                                                                                                                                                                                                                                                                                                                                                                                                                                                                                                                                                                                                                                                                                                                                                                                                                                                                                                                                                                                                                                                                           |
|------------------------------------------------------------------------------|-------------------------------------------------------------------------------------------------------------------------------------------------------------------------------------------------------------------------------------------------------------------------------------------------------------------------------------------------------------------------------------------------------------------------------------------------------------------------------------------------------------------------------------------------------------------------------------------------------------------------------------------------------------------------------------------------------------------------------------------------------------------------------------------------------------------------------------------------------------------------------------------------------------------------------------------------------------------------------------------------------------------------------------------------------------------------------------------------------------------------------------------|
| <i>Prior OA care from other health professionals</i>                         | <p>Male, 76 years: "I got my MRI scan and I took it back to the doctor and it showed that I had osteoarthritis, that it was very inflamed, that my cruciate ligament resembled a celery stick and he got me to go to see the physio."</p> <p>Male, 75 years: "My knees got really bad about last July and I went to see a surgeon with the possible view of having replacements done. The diagnosis for both knees were bone on bone. He didn't feel that I was severe enough to warrant surgery at that time, so on further discussion, he suggested that I go to physiotherapy to strengthen my legs. So, I went to a local physiotherapist."</p> <p>Female, 76 years: "I've had the experience with the osteoarthritis for about eight or nine years and first of all, I went to a knee specialist and then I went to a sports medicine specialist and orthopaedic surgeon. I did that for about eight or nine years and recently, I've been to a physiotherapist for the Good Life with osteoarthritis: Denmark (GLA:D) program*."</p>                                                                                                |
| <i>Perception of adequate OA knowledge</i>                                   | <p>Female, 49 years: "I think I have a fairly good understanding of what osteoarthritis is. I understand that I have damage to the articular cartilage of my kneecap and medial femoral condyle. I have very little cartilage at all and that's rubbing. To be honest, I didn't need him [the physiotherapist] to explain all of that."</p> <p>Male, 70 years: "The physiotherapist saw the x-rays and they have training in interpreting x-rays like that for degenerative bone disease such as osteoarthritis, cartilage wear and things like that. I was well aware that I had osteoarthritis, so I don't think he did anything to explain the osteoarthritis because I was fairly well aware of what it was on about."</p> <p>Male, 60 years: "It's just basically wear and tear, and it's really bone on bone. The surgeon explained it to me, too. He sat me down with him at his computer looking at the MRI. It's little fragments of bone and stuff that are rubbing against each other and disintegration of your bone in your patella plus around your knee. Because there's no blood flow in that area, it doesn't heal."</p> |
| <b>Theme 2: Wide variation in access and provision of physiotherapy care</b> |                                                                                                                                                                                                                                                                                                                                                                                                                                                                                                                                                                                                                                                                                                                                                                                                                                                                                                                                                                                                                                                                                                                                           |
| <i>Referral pathways</i>                                                     | <p>Male, 56 years: "Initially I went to the orthopaedic surgeon and it was deemed that surgery is inappropriate at the moment because of age and probably not severe enough to warrant a replacement. I [was referred by the surgeon to] the osteoarthritis [chronic care program]. The [osteoarthritis] chronic care program<sup>†</sup> was really an intermediary or, hopefully, a step to prevent requiring a knee replacement as such."</p>                                                                                                                                                                                                                                                                                                                                                                                                                                                                                                                                                                                                                                                                                          |

1  
2  
3  
4  
5  
6  
7  
8  
9  
10  
11  
12  
13  
14  
15  
16  
17  
18  
19  
20  
21  
22  
23  
24  
25  
26  
27  
28  
29  
30  
31  
32  
33  
34  
35  
36  
37  
38  
39  
40  
41  
42  
43  
44  
45  
46  
47  
48  
49  
50  
51  
52  
53  
54  
55  
56  
57  
58  
59  
60

---

Female, 49 years: “I mentioned to my doctor I’m getting these sore knees, she said, you should try Kieser<sup>4</sup>. I knew it was up the road, my friend went there, and my doctor said it could be a good idea.”

Female, 55 years: “I just chose them [the physiotherapy centre] because I knew they did Pilates and exercise rehab, so that’s why I went there. And they were close to home.”

Male, 72 years: “My doctor recommendation. I got on this Enhanced Primary Care Plan<sup>5</sup> where they recommend a physiotherapist.”

---

#### *Funding models*

Female, 60 years: “I had an accident at work a few years ago. I suffered quite a bit of pain and I was referred to a specialist, and he did an arthroscopy. Then I was doing follow-up physiotherapy after the arthroscopy. The surgeon did another arthroscopy and I followed up with more physiotherapy - and started doing hydrotherapy under a physiotherapist. I was doing those sessions on a regular basis. WorkCover then ceased to cover me, and so I was doing them myself out-of-pocket.”

Female, 69 years: “I went to my general practitioner and got the five treatments that you can get from the government for chronic illness. [With] the care plan you only get five treatments, but then I’ve got private health insurance, so I saw him under that as well.”

Female, 69 years: “I had ancillary benefits at that stage and I only got about five treatments covered by that ancillary benefits with Medibank Private. I couldn’t afford the ancillary benefits anymore so, no, I won’t go to a physio now.”

---

#### *Individual vs group sessions*

Female, 69 years: “The most recent physio visit was with a new physio because I was having a bicycle fit, and as part of the bike fit the physio did a full-on assessment so he talked more about osteoarthritis as well. I’ve only seen him once.”

Female, 55 years: “I didn’t see an individual physio for individual sessions in the last six months. I was always in group sessions. It’s a general fitness class but it’s mainly for menopausal age group. So, everyone has their own set of problems. It’s not tailored just for one problem; it’s tailored for everyone.”

Male, 75 years: “I went to a local physiotherapist and they did sort of two sessions of assessment. And then I started going to regular weekly classes.”

Female, 79 years: “Recently this year, I’ve been to a physiotherapist for the GLA:D\* program. As part of the GLA:D\* program, we had to do an education program and so she [the physiotherapist] showed us a diagram of the knee and explained how different things get worn out and rough. There were six different exercises in the GLA:D\* program.”

---

### **Theme 3: Seeking physiotherapy care for pain and functional limitations**

---

#### *Knee symptoms*

Female, 49 years: “My knees were becoming sorer and clicking as I walked, particularly up sets of stairs. And I have a lot of stairs at work. So, I thought I need to go and talk to a physio about it.”

Female, 51 years: “I had an ongoing knee problem and the pain was just killing me. I would be in tears with the pain. I went to the doctor; they were giving me anti-inflammatory tablets, they were not working. So, I said is there anything I can do, will physio help, and the doctor sent a referral to the physio.”

---

Female, 55 years: “Well, it was for knee pain that I wanted to go and build-up the strength in my legs to try and avoid surgery. I’ve lost capacity to squat and things like that; I’ve lost a lot of strength in my right leg and my legs have become quite bowed.”

*Functional problems*

Female, 69 years: “I think she understood what my concerns were that I couldn’t get upstairs. I couldn’t drive the car because of the clutch and the knee pain. She looked at all those things and helped me with them.”

Female, 81 years: “I told her [the physiotherapist] that my foot turns in. I also told her that my knee crunches. I can manage the pain but going up and down stairs is one of the problems that I’ve got.”

Male, 72 years: “Well I told him [the physiotherapist], I said, look, I just want to get back surfing properly and snowboarding and skiing. I said I realise I’m 72 years old and it’s not going to be easy and they said, oh no, no problem we can do it.”

**Theme 4: Physiotherapy management focussed on function and exercise**

*Assessment of function*

Male, 56 years: “Timing or just observing, getting in and out of a chair. Walking a set distance, I think it might have been like 100 metres and they time that. And then, there was going up and down stairs and they had some sort of a measurement with that. Then, over time would repeat that and see if there was any improvement.”

Female, 49 years: “He watched me from a seated position to standing. He looked at my movements. We went out the back and I did a lot of walking up and down, and they had a staircase of about three or four steps, and he watched where the pain happened there. He had me practicing, in particular, the way I walk up and down stairs to make sure that through my feet, I was balancing the weight and not throwing to one side.”

Male, 75 years: “They were measuring how far I could bend my legs laying down and standing up. Squats. Doing steps. They found that I was bending knees. I wasn’t walking correctly, but I was doing that to relieve the pain. They got me stepping up correctly with a straight leg. I think she made a record of all of her findings and then set these exercises to hopefully relieve some of the pain and strengthen my leg muscles.”

*Various types of exercises prescribed*

Female, 49 years: “He gave me an exercise program, just some gentle swinging of the knee initially, and then I built it up to other types of exercise. He had me practicing the way I walk up and down stairs, then we looked at me doing some kicking, gentle kicking with the board and gentle deep water running as opposed to doing the structured classes.”

Male, 75 years: “Other than exercise machines that they had in-house, there was elastic stretching band and she told me to do elliptical trainer at home and a cycle machine. I’ve got a list here. Its straight leg raise, bridging, clams, ball squeezes, sit to stand, lunges, calf raises ballet style, step-ups, go on the bike, and balance exercise.”

Female, 55 years: “I was doing Pilates, then I was doing Fit-Right classes. We did lots of clams with weights and off-weights. I did a lot of [reformer] where I sat on a spring-loaded box.”



*Surgery, medications, and injections are for doctors*

Male, 56 years: "I think it's the rheumatologist or my general practitioner who would be issuing the drugs so I didn't think that would be physio. I don't think meds ever really was their [the physiotherapists'] jurisdiction."

Male, 72 years: "The physio doesn't want to go into the drug side of it because of the risks. Why would he change it as regards something as serious as drugs? I'd had second thoughts and the fact that I thought they'd [a surgeon] done the wrong knee. He didn't go into that because obviously that's not part of his remit."

Female, 69 years: "The surgeon will know better about how advanced it is and I've got a lot of faith in him. He can give me a better idea of where I should proceed after this. Because I've had it before, I have got a fairly good idea of what the process will be."

*Adjunctive treatments*

Male, 76 years: "I couldn't bend the knee very well; I was in real pain and he gave me a couple of needle sessions both hot and dry needles. He massaged the knee; he did a lot to try and bend the knee."

Male, 60 years: "It's a little bit of ultrasound, but basically manipulation. I'm always tight in the hamstring. I play lawn bowls, and if it was niggly, I drop in the physio and say listen, could you tape my knee for me, please, and they do it for me straight away."

Female, 69 years: "I did get a bit of massage and a trigger point treatment to help alleviate that. We also tried, I think it's called EMS machine, an electronic stimulation machine, to try and build the muscle at one point because my kneecap was so aggravated."

### **Theme 5: Professional and personalized care**

*Trust and/or confidence*

Male, 76 years: "I thought he was excellent. He was one of the best physiotherapists I've ever seen in my life. His approach to everything, his care. Many of them can be in and out, I'm finished with you, I've only got so much time for you. None of that. He was extremely good, and I had complete trust in what he was doing. And when he did hurt me it wasn't because he wanted to hurt me, he said, oh I'm sorry and tell me if that's too hard."

Female, 69 years: "I thought she was really good. I think she understood what my concerns were that I couldn't get upstairs. I couldn't drive the car because of the clutch and the knee pain. She looked at all those things and helped me with them."

Female, 69 years: "When he gave them to me, they all seemed quite logical because I know nothing, I wouldn't know what was good or bad for me. I trusted him because I had the condition before when my knee was bad. He also knew my background and what I'd been through, so that was good to have that kind of long-term relationship."

*Personalized care*

Female, 51 years: "I had a good say in it because every time she suggested something she would ask. With appointment times, she would always check, 'Is this a good time for you?' Every time she suggested a treatment, she would ask me. She was always checking back with me."

Female, 49 years: "I think he has a very good understanding of my knee problem and I think he understands that better than my doctors, because he's worked side by side with me, he's supported me, it's more intimate. He's been keen to help resolve the problems,



rather than doing, what I call a supermarket shelf, one size fits all program. He's really worked hard to try and work out what's best in my circumstance."

Female, 49 years: "I also went to a gym called Kieser which is – I call it the sausage factory of physiotherapy. The person who started the program for me was a physiotherapist and guided that program, but I guess I didn't feel that really was addressing my issues. It was building my core strength, but it wasn't really helping my knees."

Female, 57 years: "My physiotherapist knows me well. I've been seeing him for some time, he seems to know where my problems lie. He spent the time to look at other areas which because of my osteoarthritis in my knee, I was having problems with. So at least he looked at all those areas, so I was happy with that. He came up with a few suggestions on how he would approach it, and then we went from there."

---

### Theme 6: Physiotherapy to postpone or prepare for surgery

---

Female, 60 years: "I was told by my surgeon a few years ago that it would be likely I would need a knee replacement. They don't like to do it until it's absolutely necessary. He kept telling me I was too young. They like to wait until you're so old you might die under the knife or you don't get long enough to enjoy the freedom of your new knee."

Female, 69 years: "We were talking about the advantages of doing it [surgery] sooner than later, but then he's [the physiotherapist] saying if I do it a bit later then we can strengthen the muscles in my knee and around my knee, that will make maybe recovery quicker."

Female, 60 years: "I'm on a waiting list to have a knee replacement. We know that the waiting list is fairly long, so I'll keep myself as healthy and fit as I possibly can, so that I'm able to get through this okay."

Male, 70 years: "Things like osteoarthritis and physiotherapy, there is only so much that physiotherapy can do. If it's bone on bone that doesn't replace the cartilage. All that physiotherapy can do is prescribe activities and exercises to help ameliorate the impact of the osteoarthritis because osteoarthritis doesn't go away. I've had arthroscopies on my knees, so there's no cartilage there. But I'm reluctant to have knee replacements."

183 \*Good Life with Osteoarthritis: Denmark (GLA:D) is an education and exercise program developed in Denmark for  
184 people with hip/knee osteoarthritis. The program has been adapted and delivered by physiotherapists in Australia and  
185 comprises of an initial assessment, twelve supervised group exercise sessions, two group education sessions and a  
186 follow-up assessment.<sup>19</sup>

187 †The Osteoarthritis Chronic Care Program (OACCP) is a multidisciplinary model of care developed in New South  
188 Wales, Australia for people with hip/knee osteoarthritis, specifically those awaiting elective joint replacement surgery.  
189 The program is a public-health initiative in tertiary hospitals and offers conservative management, including programs  
190 for exercise and weight loss, self-management advice, psychological and pharmacological reviews and disease  
191 management education.<sup>18</sup>

192 ‡Kieser is a strength training program using specific equipment and was originally developed in Switzerland. The  
193 program was adapted and delivered by physiotherapists in Australia in Kieser training centres.<sup>20</sup>

194 §The Enhanced Primary Care Plan is a former term for a program now called a Chronic Disease Management Plan,  
195 which is a Medicare subsidised program enabling general practitioners to refer patients with a chronic medical  
196 condition to a maximum of five allied health services (including physiotherapists) per calendar year.<sup>21</sup>

197

1  
2  
3 198 *Theme 1: Presented with a pre-existing OA diagnosis*  
4  
5

6 199 Participants tended to have a diagnosis of knee OA already made by a doctor prior to their  
7  
8 200 physiotherapy consultation and did not seek physiotherapists to take on a diagnostic role. They  
9  
10 201 often brought knee imaging results with them to the physiotherapy consultation. Some expected  
11  
12 202 physiotherapists to access imaging results from their general practitioners. Participants described  
13  
14 203 a range of other health professionals they had consulted for their knee problems before consulting  
15  
16 204 a physiotherapist, such as a general practitioner, rheumatologist, orthopaedic surgeon and/or sports  
17  
18 205 medicine physician.  
19  
20  
21

22  
23 206 Participants generally perceived their pre-existing knowledge and understanding about OA to be  
24  
25 207 adequate. They had typically acquired their knowledge from personal experience and/or from  
26  
27 208 conversations with healthcare professionals prior to them seeking physiotherapy care. Often,  
28  
29 209 knowledge about OA was constructed from imaging (e.g. x-ray) results. Participants often  
30  
31 210 described their OA with phrases such as ‘wear and tear’, ‘bone on bone’, ‘degenerative’ and/or  
32  
33 211 ‘cartilage wear’.  
34  
35  
36

37 212 *Theme 2: Wide variation in access and provision of physiotherapy care*  
38  
39

40 213 Participants accessed physiotherapy through a variety of care models, including consultations at  
41  
42 214 private physiotherapy practices, participation in programs specifically developed for OA  
43  
44 215 management delivered in the public (e.g. Osteoarthritis Chronic Care Program(28)) and private  
45  
46 216 (Good Life with Osteoarthritis Denmark (GLA:D(29)) healthcare settings, participation in more  
47  
48 217 generic strengthening-based programs (e.g. Kieser(30)), hydrotherapy and/or generic exercise  
49  
50 218 classes (e.g. Pilates/gym). Most were referred by their general practitioners or other medical  
51  
52 219 specialists but some “self-referred” to a local physiotherapist. Participants chose their  
53  
54  
55  
56  
57  
58  
59  
60

1  
2  
3 220 physiotherapist by convenience (e.g. physiotherapist located in the same medical practice as their  
4  
5 221 general practitioner or located close to home), by following a recommendation from their friend  
6  
7  
8 222 or doctor, or based on prior experience (e.g. previously consulted the physiotherapist for other  
9  
10 223 musculoskeletal conditions and/or their knee problem).

11  
12  
13 224 Participant attendance at physiotherapy services often relied on funding being available to  
14  
15 225 subsidise cost of care. Some participants described accessing physiotherapy in public hospital  
16  
17 226 settings (e.g. Osteoarthritis Chronic Care Program(28)), some received Medicare rebates for  
18  
19 227 physiotherapy services in the private sector (e.g. via Chronic Disease Management Plans(31)),  
20  
21  
22 228 whilst others were subsidised through their private health insurance or other regulatory body (such  
23  
24 229 as worker compensation schemes). A few participants paid out-of-pocket to cover their  
25  
26  
27 230 physiotherapy costs. Participants often ceased their physiotherapy visits because funding ran out.  
28  
29  
30 231 Participants received physiotherapy care via individual consultations and/or via group sessions.  
31  
32 232 Some participants attended one-on-one consultations several times before transitioning to a group  
33  
34 233 setting. Most described undergoing an individual assessment with the physiotherapist, including  
35  
36  
37 234 those who ultimately participated in group classes. People referred to physiotherapy under the  
38  
39 235 Chronic Disease Management Plan typically attended individual physiotherapy sessions up to five  
40  
41 236 times.

42  
43  
44 237 *Theme 3: Seeking physiotherapy care for pain and functional limitations*

45  
46  
47 238 Participants spoke about their knee symptoms as a major driver of seeking care, including ongoing  
48  
49 239 knee pain, swelling, clicking and muscle weakness. They expressed frustration with the pain they  
50  
51  
52 240 experienced, particularly when it made them unable to move the knee or walk properly. Words  
53  
54 241 such as 'click', 'crunch' or 'crack' were commonly used to describe other symptoms. Participants  
55  
56  
57  
58  
59  
60

1  
2  
3 242 spoke about feeling weak around their knees, which caused their knee to ‘give way’ or ‘collapse’.  
4  
5 243 Participants also sought care because of difficulties with functional activities such as walking,  
6  
7 244 driving, getting in/out of the bed/chair/toilet/shower, negotiating steps and squatting. Some  
8  
9  
10 245 participants avoided doing sports/recreational activities (e.g. cycling, surfing, running, swimming)  
11  
12 246 for fear of exacerbating pain. Many people expected physiotherapists to provide treatments to  
13  
14  
15 247 relieve the pain and assist with building knee strength, as well as helping them to return to activities  
16  
17 248 they previously enjoyed or were now unable to do.

18  
19  
20 249 *Theme 4: Physiotherapy management focused on function and exercise*

21  
22  
23 250 The physiotherapist typically assessed functional ability, including walking, squatting, getting  
24  
25 251 in/out of a chair and negotiating stairs. Some participants were timed when performing functional  
26  
27 252 tests, and others were asked to repeat the tests as they progressed through their treatment sessions.  
28  
29  
30 253 Participants consistently described exercise as a key component of their physiotherapy  
31  
32 254 consultations. They received advice about different types of exercises for their OA, including  
33  
34 255 strengthening, cardiovascular, stretching, balance and functional movement programs. Some  
35  
36  
37 256 participants were instructed to use exercise equipment such as elastic resistance bands and/or  
38  
39 257 weights to progress the intensity of the exercises. For those who were given home exercise  
40  
41 258 programs, exercise handouts or online instructions were provided. Some participants also attended  
42  
43  
44 259 supervised group exercise classes such as gym or fitness-based program, Pilates, hydrotherapy,  
45  
46 260 balance and/or strengthening classes.

47  
48  
49 261 Participants tended not to expect information about surgery, medications and knee injections from  
50  
51 262 their physiotherapist, instead considering these domains of care as a doctor’s responsibility. Many  
52  
53  
54 263 did not see the need for physiotherapists to cover these options further and some participants felt

1  
2  
3 264 that physiotherapists should refrain from providing any medication advice because they do not  
4  
5 265 have prescription rights.  
6  
7

8 266 Some participants received adjunctive treatments from physiotherapists such as massage, dry  
9  
10 267 needling/acupuncture and manual knee mobilisation techniques to relieve muscle tightness and  
11  
12 268 joint stiffness. Transcutaneous electrical nerve stimulation and electronic muscle stimulator  
13  
14 269 machines were sometimes provided to relieve knee pain and stimulate muscles respectively. Other  
15  
16 270 common adjunctive treatments offered by physiotherapists included ultrasound, heat/cold pack,  
17  
18 271 taping and using a knee brace. These were typically delivered during individual physiotherapy  
19  
20 272 consultations.  
21  
22  
23

24  
25 273 *Theme 5: Professional and personalized care*  
26  
27

28 274 Generally, most participants were happy and satisfied with the physiotherapy care they received.  
29  
30 275 Some described having trust in their physiotherapists, both in their clinical skills and professional  
31  
32 276 knowledge when managing knee OA. Most felt that their physiotherapist understood and  
33  
34 277 appreciated the problems they were experiencing, and some were impressed that the  
35  
36 278 physiotherapist was able to identify what was 'going on' with their knees. Participants were also  
37  
38 279 confident that their physiotherapists could help them by providing practical advice and/or  
39  
40 280 strategies to overcome their specific problems.  
41  
42  
43  
44

45 281 Participants valued the highly personalised care they received and felt that physiotherapists  
46  
47 282 generally provided care that was tailored to their needs. They spoke about their physiotherapist as  
48  
49 283 being empathetic and understanding towards their condition/circumstances. Some felt that their  
50  
51 284 physiotherapist 'knew them well', which enabled the physiotherapist to provide the care and  
52  
53 285 support they desired/needed. Others highlighted the value of working collaboratively with their  
54  
55  
56  
57  
58  
59  
60

286 physiotherapist and appreciated having a ‘two-way discussion’, where the participant was asked  
 287 for their input in devising a treatment plan for their OA. When care was not personalised,  
 288 participants expressed a sense of disappointment, describing the treatment received as a ‘sausage  
 289 factory’, ‘supermarket shelf’, or being a ‘one size fits all program’

290 *Theme 6: Physiotherapy to postpone or prepare for surgery*

291 Participants perceived that joint replacement surgery was inevitable for their knee problems. Many  
 292 were informed of this by their doctor and some were already on hospital waiting lists for surgery.  
 293 However, participants were also advised by their doctors/surgeons to delay surgery for as long as  
 294 possible and some attended the physiotherapist in an effort to achieve this. Participants generally  
 295 believed that physiotherapists were not able to ‘cure’ OA but could help in reducing its impact.  
 296 Some described the role of physiotherapy as providing them with strategies to strengthen the knees  
 297 and alleviate their OA symptoms in order to delay surgery. Whilst some participants ‘prepared’  
 298 their knee for surgery by seeing a physiotherapist, others were keen to have surgery as soon as  
 299 possible.

300 *Alignment with Clinical Care Standard for knee osteoarthritis*

301 Deductive analysis was used to generate Table 4, which summarises how participant experiences  
 302 of physiotherapy care for knee OA aligned with the Clinical Care Standard.

303 **Table 4: Alignment of participant experiences of physiotherapy care with the national Clinical Care Standard**  
 304 **for knee osteoarthritis (OA).**

| Domains of care                 | Key elements of care                                              | Patient experiences receiving care                                                                                                                                                               |
|---------------------------------|-------------------------------------------------------------------|--------------------------------------------------------------------------------------------------------------------------------------------------------------------------------------------------|
| <b>Comprehensive assessment</b> | Assess history of presenting symptoms and other health conditions | Patients expected their physiotherapists to provide treatments for relief of knee pain, to strengthen muscles and to return them to activities they previously enjoyed or were now unable to do. |
|                                 | Conduct a physical examination                                    | Patients described being typically assessed for functional ability (e.g. walking, squatting, getting in/out of a chair, negotiating stairs). Some were timed when performing                     |

|                                       |                                                                                                                          |                                                                                                                                                                                                                                                                                                                                                                                                                                                                                                                                                                                                       |
|---------------------------------------|--------------------------------------------------------------------------------------------------------------------------|-------------------------------------------------------------------------------------------------------------------------------------------------------------------------------------------------------------------------------------------------------------------------------------------------------------------------------------------------------------------------------------------------------------------------------------------------------------------------------------------------------------------------------------------------------------------------------------------------------|
|                                       |                                                                                                                          | functional tests, and others were asked to repeat the tests as they progressed through their treatment sessions.                                                                                                                                                                                                                                                                                                                                                                                                                                                                                      |
|                                       | Evaluate psychosocial factors                                                                                            | Patients rarely described any psychosocial evaluation by their physiotherapist.                                                                                                                                                                                                                                                                                                                                                                                                                                                                                                                       |
| <b>Diagnosis</b>                      | Diagnose knee OA clinically                                                                                              | Patients generally had received a knee OA diagnosis from their doctor prior to seeing their physiotherapist. They often had knee imaging results to bring to their physiotherapy consultations.                                                                                                                                                                                                                                                                                                                                                                                                       |
|                                       | Consider imaging for alternative diagnosis only                                                                          | Patients did not touch on this aspect as they typically went to their physiotherapist with imaging results from their doctor.                                                                                                                                                                                                                                                                                                                                                                                                                                                                         |
| <b>Education and self-management</b>  | Provide education about knee OA and available treatments                                                                 | Patients perceived they had adequate pre-existing knowledge and understanding about OA.                                                                                                                                                                                                                                                                                                                                                                                                                                                                                                               |
|                                       | Individualized self-management plan based on physical and psychosocial needs                                             | Patients felt that their physiotherapist generally provided care that was tailored to their needs. Patients rarely mentioned any psychosocial considerations when discussing self-management plans with the physiotherapist.                                                                                                                                                                                                                                                                                                                                                                          |
| <b>Weight loss and exercise</b>       | Support people who are overweight or obese to lose weight                                                                | Some patients did not perceive their weight as an issue. For those with weight problems, some described having a discussion with their physiotherapist about the importance of weight loss/maintenance.                                                                                                                                                                                                                                                                                                                                                                                               |
|                                       | Tailor exercise according to needs and preferences                                                                       | Patients received advice about various exercises (e.g. strengthening, cardiovascular, stretching, balance, functional movement programs) for their OA. Some used elastic resistance bands and/or weights for exercises. Some attended supervised group exercise classes (e.g. gym or fitness-based program, Pilates, hydrotherapy, balance, strengthening classes). Some also received adjunctive treatments (e.g. massage, dry needling/acupuncture, manual techniques, transcutaneous electrical nerve stimulation, electronic muscle stimulator machines, ultrasound, heat/cold pack, and taping). |
|                                       | Establish weight and exercise goals, and refer to other services for assistance as required                              | Exercise goals and programs were routinely established with physiotherapists. Patients rarely described establishing weight loss goals or being referred to other healthcare providers for weight loss support.                                                                                                                                                                                                                                                                                                                                                                                       |
| <b>Medications to manage symptoms</b> | Offer appropriate medicines to manage symptoms, considering clinical condition and preferences                           | Patients did not expect information about medications and knee injections from their physiotherapist.                                                                                                                                                                                                                                                                                                                                                                                                                                                                                                 |
| <b>Patient review</b>                 | Agree on regular reviews according to patient's needs                                                                    | Patient attendance at physiotherapy services often relied on funding being available to subsidise cost of care. Reviews would often cease when funding ran out.                                                                                                                                                                                                                                                                                                                                                                                                                                       |
|                                       | Refer to specialist if knee OA symptoms worsen and severe functional impairment persists despite conservative management | Patients generally sought care from a physiotherapist to postpone, or prepare for, knee surgery.                                                                                                                                                                                                                                                                                                                                                                                                                                                                                                      |



|                |                                                                                  |                                                                                                  |
|----------------|----------------------------------------------------------------------------------|--------------------------------------------------------------------------------------------------|
| <b>Surgery</b> | Offer timely joint surgery to patients not responding to conservative management | Patients generally sought care from a physiotherapist to postpone, or prepare for, knee surgery. |
|                | Provide surgical information to inform treatment decision                        | Patients did not expect information about knee surgery from their physiotherapist.               |
|                | Only offer arthroscopy to patients with true mechanical locking                  | Patients rarely mentioned discussing knee arthroscopy with their physiotherapist.                |

305

306 **Discussion**

307 This qualitative study explored experiences of people who had received physiotherapy care for  
 308 their knee OA in Australia and how they aligned with the national Clinical Care Standard for knee  
 309 OA.(8) Participants within this study valued physiotherapists' ability to provide professional and  
 310 personalized care and described having a strong sense of trust and/or confidence in their  
 311 physiotherapist. They also felt that physiotherapists understood their problems. These findings are  
 312 consistent with previous research, which showed that patient satisfaction with physiotherapy care  
 313 for a range of musculoskeletal conditions was generally high in Australia and other countries such  
 314 as those in Northern Europe, North America, the United Kingdom and Ireland.(32)  
 315 Physiotherapists' interpersonal and communication skills are important attributes to high patient  
 316 satisfaction.(32) Our findings suggest that, generally, patients within this study perceived  
 317 Australian physiotherapists to work in a patient-centred way to ensure that patients' treatment  
 318 expectations, needs and preferences are respected. Such care aligned with the Clinical Care  
 319 Standard relating to self-management, where patients received management plan that suited their  
 320 needs and preferences. These findings were also similar to our previous study with  
 321 physiotherapists,(7) who described offering an individualised self-management plan based on knee  
 322 symptoms and signs, functional ability and goals.



1  
2  
3 323 Participants utilised various referral pathways and a range of different funding models to access  
4  
5 324 physiotherapy care through a diverse array of service delivery options. This suggests that there is  
6  
7  
8 325 not a single 'one size fits all' model of physiotherapy care that will suit the needs and individual  
9  
10 326 circumstances of all Australians living with knee OA. Our findings highlight how important it is  
11  
12 327 for healthcare systems to offer different models of physiotherapy care, in both the public and  
13  
14 328 private sectors, for example, spanning individual consultations through to group exercise classes.  
15  
16 329 This helps to reduce inequity of access to physiotherapy care for people with knee OA, which may  
17  
18 330 arise from geographical location or socioeconomic status.(33) Indeed, a community-based survey  
19  
20 331 of 1000 people with arthritis in Australia found that over two thirds of respondents felt that they  
21  
22 332 did not cope well with their condition because of the health care they experienced, and felt that  
23  
24 333 they had poor access to medical doctors, specialists and allied health professionals.(34) Allowing  
25  
26 334 patients the flexibility to choose which type of physiotherapy service best suits their needs,  
27  
28 335 preferences and financial situation also aligns with a philosophy of patient-centred care,(35, 36)  
29  
30  
31 336 and permits the patient to have some control over their own health care.

32  
33  
34  
35  
36 337 Our findings highlight how reliant people with knee OA are on government-funded health care  
37  
38 338 and/or third-party payers (such as private health insurers) to fund their physiotherapy care.  
39  
40 339 Participants predominantly accessed and received care from physiotherapists in private practice  
41  
42 340 settings and typically ceased physiotherapy when funding ran out and they were required to pay  
43  
44 341 out-of-pocket for services. These findings are consistent with key Australian policy documents,  
45  
46 342 including the National Osteoarthritis Strategy,(37) that have called for expansion of funding to  
47  
48 343 support OA care delivery, including care delivered by physiotherapists.(38) Given the chronicity  
49  
50 344 of knee OA, regular reviews and follow-up are advocated to allow for monitoring of symptoms,  
51  
52 345 permit timely changes to management, and to support effective self-management.(1) However,

1  
2  
3 346 similar to a previous study in Australia,(39) the costs associated with physiotherapy treatments  
4  
5 347 were identified by our participants as an important barrier to continuing to access physiotherapy  
6  
7 348 care for OA. Our findings highlight the importance of funding mechanisms for physiotherapy  
8  
9 349 services to relieve the financial burden that people experience when accessing necessary care for  
10  
11 350 knee OA. Therefore, it remains unclear if patients were offered regular reviews by their  
12  
13 351 physiotherapist, as recommended by the Clinical Care Standard, due to lack of funding being a  
14  
15 352 potential barrier to regular reviews.  
16  
17  
18  
19

20 353 Although pain was one of the important drivers of care-seeking in our participants, many also  
21  
22 354 desired help from the physiotherapist to maintain or improve muscle strength and physical  
23  
24 355 function. These findings highlight the need for physiotherapists to co-develop (with the patient) a  
25  
26 356 multi-faceted management plan that does not only focus on pain relief strategies but also  
27  
28 357 incorporates interventions that target strength and assist patients to engage in activities that are  
29  
30 358 meaningful to them. It is thus not surprising that participants in our study described the important  
31  
32 359 role that physiotherapists played in prescribing personalised exercise and addressing functional  
33  
34 360 deficits. A systematic review of patients' perceived health service needs for OA also showed that  
35  
36 361 one of the key reasons patients typically consulted physiotherapists was for exercise  
37  
38 362 advice/prescription.(5) Our patient perspectives about the important role that physiotherapists play  
39  
40 363 in prescribing exercise align with the perspectives of general practitioners,(40, 41) who often refer  
41  
42 364 patients with chronic knee pain to physiotherapists for exercise. General practitioners describe lack  
43  
44 365 of time as the most common barrier for them to initiate exercise with their patients, preferring  
45  
46 366 instead to refer their patient to a physiotherapist.(40, 42) Similarly, physiotherapists themselves  
47  
48 367 also perceived exercise and physical activity to be their main role in the management of people  
49  
50 368 with knee OA (7, 43) and are confident to prescribe exercises to improve knee strength and range  
51  
52  
53  
54  
55  
56  
57  
58  
59  
60

1  
2  
3 369 of movement.(44) However, inconsistent with the Clinical Care Standard, it appeared that patients  
4  
5 370 were predominantly assessed by their physiotherapist for their knee symptoms and functional  
6  
7 371 limitations, with little consideration of psychosocial factors. In addition, the management plan  
8  
9 372 provided by the physiotherapist tended to overlook strategies specifically related to weight  
10  
11 373 loss/maintenance. Our patient findings are also similar to our previous study with physiotherapists,  
12  
13 374 (7) who tended to focus on biomedical assessment and management of knee OA. Regarding weight  
14  
15 375 loss advice, they generally provided education about the importance of weight loss rather than  
16  
17 376 advice about strategies to lose weight.  
18  
19  
20  
21

22 377 Interestingly, participants tended to have an OA diagnosis already made prior to their  
23  
24 378 physiotherapy consultation. They also believed that they already had adequate knowledge and  
25  
26 379 understanding about their knee OA. This was despite the fact that participants appeared to have  
27  
28 380 different perceptions about knee OA (describing it as 'wear and tear', 'bone on bone',  
29  
30 381 'degenerative' and/or 'cartilage wear') and their belief that surgery is an inevitable consequence.  
31  
32 382 These perceptions and beliefs about OA are similar to findings from another study exploring  
33  
34 383 reasons why patients resorted to surgical interventions for knee OA.(45) Once the participants in  
35  
36 384 that study had been "diagnosed" with "bone-on-bone" changes, many disregarded exercise-based  
37  
38 385 interventions (which they believed would damage their joint) in favour of alternative and  
39  
40 386 experimental treatments (which they believed would help regenerate lost cartilage). Such  
41  
42 387 perceptions and beliefs about OA are detrimental considering there is often a mismatch between  
43  
44 388 imaging findings and OA symptoms (46, 47) and that conservative management such as exercise  
45  
46 389 can reduce pain irrespective of radiographic severity.(48, 49) In addition, as some primary care  
47  
48 390 specialists are hesitant to refer patients with OA to physiotherapy because they either perceive  
49  
50 391 exercise to be ineffective or lack trust in physiotherapists to provide evidence-based care,(50)  
51  
52  
53  
54  
55  
56  
57  
58  
59  
60

1  
2  
3 392 patients may not necessarily have been well-informed about the benefits of exercises during their  
4  
5 393 specialist consultation.(51) In order to maximise success with exercise interventions, these  
6  
7  
8 394 findings suggest that physiotherapists could consider reframing their conversations to actively  
9  
10 395 invite the patient to share their pre-existing knowledge about OA so that any perceptions may be  
11  
12 396 subtly corrected, and evidence-based educational resources shared. Physiotherapists should  
13  
14  
15 397 consider the language they use when discussing OA (i.e. avoid biomedical terms such as ‘wear  
16  
17 398 and tear’ or ‘degenerative’) so that they are not contributing to patient misinformation (i.e. joint  
18  
19 399 surgery is inevitable; OA symptoms will worsen over time), and instead provide a sense of hope  
20  
21  
22 400 and optimism for prognosis with conservative care.

23  
24 401 Participants also did not expect physiotherapists to provide them with information regarding  
25  
26 402 medications, knee injections and surgery even though these topics are advocated as important  
27  
28  
29 403 responsibilities of all health professionals when managing OA.(1, 52) Instead, participants  
30  
31 404 generally approached their medical doctors for advice in these domains of care. This is likely  
32  
33  
34 405 because, in Australia, physiotherapists can only provide advice about over-the-counter  
35  
36 406 medications and do not have prescribing rights. Regarding knee surgery, patients mainly sought  
37  
38 407 physiotherapy care to postpone or prepare for knee surgery. Our patient findings are similar to our  
39  
40  
41 408 previous study with physiotherapists,(7) who had also felt that surgical advice was outside the  
42  
43 409 scope of practice of physiotherapy care. However, some physiotherapists described their role as  
44  
45 410 preparing patients for knee surgery when they were referred for physiotherapy.

46  
47  
48 411 Some participants received adjunctive treatments from their physiotherapist, such as massage,  
49  
50 412 acupuncture and electrotherapy interventions despite limited evidence to support their use.(1, 3,  
51  
52  
53 413 53) We do not know if participants specifically requested these treatments and/or if their  
54  
55 414 physiotherapist helped the participant to make an informed treatment decision by discussing their

1  
2  
3 415 limited treatment efficacy for knee OA. Patients with other musculoskeletal conditions, such as  
4  
5 416 low back pain, often present to physiotherapists with pre-conceived ideas about physiotherapy  
6  
7 417 treatment,(54) and may desire ‘hands-on’ treatment or any intervention that has previously eased  
8  
9 418 their back symptoms. Physiotherapists may feel obliged to provide treatments with limited efficacy  
10  
11 419 in order to meet the patient’s treatment expectation.  
12  
13  
14

15 420 A strength of our study was its qualitative design, which allowed us to explore the experiences of  
16  
17 421 people receiving physiotherapy care for knee OA in Australia. In order to explore diversity in  
18  
19 422 experiences, we interviewed a range of participants, including males and females of differing age,  
20  
21 423 occupational status and geographical location across Australia. Our study also has limitations.  
22  
23 424 There was no patient and public involvement in the design of this research. Participants responded  
24  
25 425 to advertisements (social media) and/or email invitations (research volunteer database) to  
26  
27 426 participate and thus our sample may be biased towards those who had favourable experiences with  
28  
29 427 physiotherapy and/or were successful at accessing physiotherapy. There were many more females  
30  
31 428 than males in the sample which may reflect the social media approach to recruitment. Participants  
32  
33 429 were reimbursed for their time with a \$50 gift card so they might have responded to interview  
34  
35 430 questions in a socially desirable manner. Efforts were made to reduce this effect by informing  
36  
37 431 participants at the beginning of the interview that there were no right or wrong answers to the  
38  
39 432 questions asked. Our sample was constrained to participants who could speak English and given  
40  
41 433 that 21% of Australians speak a language other than English at home,(55) we do not know if our  
42  
43 434 findings reflect the experiences of people from culturally and linguistically diverse backgrounds.  
44  
45 435 Furthermore, physiotherapists are a primary contact health profession in Australia so patient  
46  
47 436 experiences with physiotherapy care for knee OA may be different in other countries where people  
48  
49 437 can only access a physiotherapist on referral. Future research is particularly warranted in low to  
50  
51  
52  
53  
54  
55  
56  
57  
58  
59  
60

1  
2  
3 438 middle income countries, given that social factors such as education level and income influence  
4  
5 439 patient access to allied health services such as physiotherapy.(56) Our findings may also not be  
6  
7 440 applicable in countries where cultural beliefs differ considerably from the Australian context. The  
8  
9 441 perception of pain, health beliefs and concept of disability and its management often vary from  
10  
11 442 one culture to another(57) and thus may influence patients' experiences managing their conditions.  
12  
13  
14  
15 443 In conclusion, our findings provide evidence from the patient's perspective about the important  
16  
17 444 role physiotherapists play in the care of Australians with knee OA, reinforcing the need for  
18  
19 445 equitable access to physiotherapy services that are supported by a range of funding models.  
20  
21 446 Findings highlight the importance of different pathways for accessing care to meet the needs of  
22  
23 447 individuals and ensure that all people with knee OA are adequately supported in managing their  
24  
25 448 condition. Overall, patients' experiences with receiving physiotherapy care for their knee OA were  
26  
27 449 partly aligned with the Clinical Care Standard, particularly regarding comprehensive assessment,  
28  
29 450 self-management, and exercise.  
30  
31  
32  
33  
34  
35  
36  
37  
38  
39  
40  
41  
42  
43  
44  
45  
46  
47  
48  
49  
50  
51  
52  
53  
54  
55  
56  
57  
58  
59  
60

## 459 **Contributors**

460 PLT, KLB, KSD and RSH contributed to the study conception and design. PLT completed data  
461 collection. PLT, KLB, LBJ, TE, KSD and RSH contributed to the data analysis and interpretation  
462 of data. PLT wrote the first draft of the manuscript. PLT, KLB, LBJ, TE, KSD and RSH revised  
463 the paper and provided scientific input. PLT, KLB, LBJ, TE, KSD and RSH approved the final  
464 version of the manuscript.

## 465 **Role of the funding source**

466 This work was supported by funding from the National Health and Medical Research Council  
467 (Centre of Research Excellence; number 1079078). Ms Teo is supported by a PhD stipend from  
468 the Australian Government Research Training Program Scholarship. Professor Hinman is  
469 supported by a National Health and Medical Research Council Fellowship (#1154217). Professor  
470 Bennell is supported by a National Health and Medical Research Council Investigator Grant (#  
471 1174431). Professor Dziejic was part-funded by the National Institute for Health Research  
472 (NIHR) Collaborations for Leadership in Applied Health Research and Care West Midlands and a  
473 Knowledge Mobilisation Research Fellowship (KMRF- 2014-03-002) from the NIHR and is an  
474 NIHR Senior Investigator. The funders had no role in the development of the study method,  
475 interpretation of the results or reporting.

## 476 **Conflict of interest**

477 The authors declare that they have no competing interests.

## 478 **Data availability statement**

479 No data are available.



480 **References:**

- 481 1. NICE. Clinical guideline: Osteoarthritis care and management in adults. United Kingdom:  
482 National Institute for Health and Care Excellence; 2014.
- 483 2. Bannuru RR, Osani MC, Vaysbrot EE, et al. Oarsi guidelines for the non-surgical management of  
484 knee, hip, and polyarticular osteoarthritis. *Osteoarthritis and Cartilage*. 2019;27(11):1578-89.
- 485 3. Kolasinski SL, Neogi T, Hochberg MC, et al. 2019 american college of rheumatology/arthritis  
486 foundation guideline for the management of osteoarthritis of the hand, hip, and knee. *Arthritis*  
487 *Rheumatol*. 2020;72(2):220-33.
- 488 4. Australian Institute of Health and Welfare. Use of health services for arthritis and osteoporosis.  
489 Canberra; 2010.
- 490 5. Papandony MC, Chou L, Seneviwickrama M, et al. Patients' perceived health service needs for  
491 osteoarthritis (oa) care: A scoping systematic review. *Osteoarthritis Cartilage*. 2017;25(7):1010-25.
- 492 6. Dobson F, Bennell KL, French SD, et al. Barriers and facilitators to exercise participation in  
493 people with hip and/or knee osteoarthritis: Synthesis of the literature using behavior change theory.  
494 *American Journal of Physical Medicine & Rehabilitation*. 2016;95(5):372-89.
- 495 7. Teo PL, Bennell KL, Lawford BJ, et al. Physiotherapists may improve management of knee  
496 osteoarthritis through greater psychosocial focus, being proactive with advice, and offering longer-term  
497 reviews: A qualitative study. *J Physiother*. 2020;66(4):256-65.
- 498 8. Australian Commission on Safety and Quality in Health Care. Osteoarthritis of the knee clinical  
499 care standard Sydney: ACSQHC2017 [Available from: [https://www.safetyandquality.gov.au/wp-](https://www.safetyandquality.gov.au/wp-content/uploads/2018/04/Osteoarthritis-of-the-knee-Clinical-Care-Standard.pdf)  
500 [content/uploads/2018/04/Osteoarthritis-of-the-knee-Clinical-Care-Standard.pdf](https://www.safetyandquality.gov.au/wp-content/uploads/2018/04/Osteoarthritis-of-the-knee-Clinical-Care-Standard.pdf)].
- 501 9. Mann C, Gooberman-Hill R. Health care provision for osteoarthritis: Concordance between what  
502 patients would like and what health professionals think they should have. *Arthritis Care & Research*.  
503 2011;63(7):963-72.
- 504 10. Nyvang J, Hedström M, Gleissman SA. It's not just a knee, but a whole life: A qualitative  
505 descriptive study on patients' experiences of living with knee osteoarthritis and their expectations for  
506 knee arthroplasty. *International Journal of Qualitative Studies on Health and Well-being*.  
507 2016;11(1):30193.
- 508 11. Smith TO, Purdy R, Lister S, et al. Attitudes of people with osteoarthritis towards their  
509 conservative management: A systematic review and meta-ethnography. *Rheumatology International*.  
510 2014;34(3):299-313.
- 511 12. Pouli N, Das Nair R, Lincoln NB, et al. The experience of living with knee osteoarthritis: Exploring  
512 illness and treatment beliefs through thematic analysis. *Disability and Rehabilitation*. 2014;36(7):600-7.
- 513 13. Spitaels D, Vankrunkelsven P, Desfosses J, et al. Barriers for guideline adherence in knee  
514 osteoarthritis care: A qualitative study from the patients' perspective. *Journal Of Evaluation In Clinical*  
515 *Practice*. 2017;23(1):165-72.
- 516 14. Wallis JA, Taylor NF, Bunzli S, et al. Experience of living with knee osteoarthritis: A systematic  
517 review of qualitative studies. *BMJ Open*. 2019;9(9):e030060.
- 518 15. Hall M, Migay A-M, Persad T, et al. Individuals' experience of living with osteoarthritis of the  
519 knee and perceptions of total knee arthroplasty. *Physiotherapy Theory and Practice*. 2008;24(3):167-81.
- 520 16. Allison K, Delany C, Setchell J, et al. A qualitative study exploring the views of individuals with  
521 knee osteoarthritis on the role of physiotherapists in weight management: A complex issue requiring a  
522 sophisticated skill set. *Musculoskeletal Care*. 2019;17(2):206-14.
- 523 17. Lawford BJ, Delany C, Bennell KL, et al. "I was really sceptical...But it worked really well": A  
524 qualitative study of patient perceptions of telephone-delivered exercise therapy by physiotherapists for  
525 people with knee osteoarthritis. *Osteoarthritis and Cartilage*. 2018;26(6):741-50.



- 1  
2  
3 526 18. Campbell R, Evans M, Tucker M, et al. Why don't patients do their exercises? Understanding  
4 527 non-compliance with physiotherapy in patients with osteoarthritis of the knee. *Journal of Epidemiology*  
5 528 and *Community Health*. 2001;55(2):132-8.
- 6 529 19. Law R-J, Nafees S, Hiscock J, et al. A lifestyle management programme focused on exercise, diet  
7 530 and physiotherapy support for patients with hip or knee osteoarthritis and a body mass index over 35: A  
8 531 qualitative study. *Musculoskeletal Care*. 2019;17(1):145-51.
- 9 532 20. Baxter P, Jack S. Qualitative case study methodology: Study design and implementation for  
10 533 novice researchers. *The Qualitative Report*. 2008;13:544+.
- 11 534 21. Greenhalgh T. What have the social sciences ever done for equity in health policy and health  
12 535 systems? *International Journal for Equity in Health*. 2018;17(1):124.
- 13 536 22. Malterud K. The art and science of clinical knowledge: Evidence beyond measures and numbers.  
14 537 *Lancet*. 2001;358(9279):397-400.
- 15 538 23. Ong BN, Richardson JC. The contribution of qualitative approaches to musculoskeletal research.  
16 539 *Rheumatology*. 2006;45(4):369-70.
- 17 540 24. O'Brien BC, Harris IB, Beckman TJ, et al. Standards for reporting qualitative research: A synthesis  
18 541 of recommendations. *Academic Medicine*. 2014;89(9):1245-51.
- 19 542 25. Moser A, Korstjens I. Series: Practical guidance to qualitative research. Part 3: Sampling, data  
20 543 collection and analysis. *Eur J Gen Pract*. 2018;24(1):9-18.
- 21 544 26. Judith ES, Kathleen JH. Comparing telephone and face-to-face qualitative interviewing: A  
22 545 research note. *Qualitative Research*. 2004;4(1):107-18.
- 23 546 27. Morse JM, Field P-A. *Nursing research*. [electronic resource] : The application of qualitative  
24 547 approaches. 2nd ed. ed: Chapman & Hall; 1996.
- 25 548 28. Arthritis Australia. Time to move: Osteoarthritis Australia2014 [Available from:  
26 549 [http://www.arthritisaustralia.com.au/images/stories/documents/reports/TTM/Final%20Arthritis%20Aus%20Time%20to%20Move\\_OA\\_140618.pdf](http://www.arthritisaustralia.com.au/images/stories/documents/reports/TTM/Final%20Arthritis%20Aus%20Time%20to%20Move_OA_140618.pdf).  
27 550
- 28 551 29. La Trobe University. Glad australia La Trobe University2017 [Available from:  
29 552 <https://gladaustralia.com.au/>.  
30 553
- 31 554 30. Kieser Australia. About kieser South Melbourne2020 [Available from:  
32 555 <https://www.kieser.com.au/about-kieser/>.  
33 556
- 34 557 31. Australian Government Department of Health. Chronic disease management - individual allied  
35 558 health services under medicare - patient information 2014 [Available from:  
36 559 <http://www.health.gov.au/internet/main/publishing.nsf/Content/health-medicare-allied-health-brochure.htm>.  
37 560
- 38 561 32. Hush JM, Yung V, Mackey M, et al. Patient satisfaction with musculoskeletal physiotherapy care  
39 562 in australia: An international comparison. *J Man Manip Ther*. 2012;20(4):201-8.
- 40 563 33. Bath B, Jakubowski M, Mazzei D, et al. Factors associated with reduced perceived access to  
41 564 physiotherapy services among people with low back disorders. *Physiother Can*. 2016;68(3):260-6.
- 42 565 34. Arthritis Australia. The ignored majority: The voice of arthritis 2011 Australia2011 [Available  
43 566 from:  
44 567 [http://www.arthritisaustralia.com.au/images/stories/documents/reports/2011\\_updates/the%20voice%20of%20arthritis%202011.pdf](http://www.arthritisaustralia.com.au/images/stories/documents/reports/2011_updates/the%20voice%20of%20arthritis%202011.pdf).  
45 568
- 46 569 35. Brand CA, Ackerman IN, Bohensky MA, et al. Chronic disease management: A review of current  
47 570 performance across quality of care domains and opportunities for improving osteoarthritis care. *Rheum*  
48 571 *Dis Clin North Am*. 2013;39(1):123-43.
- 49 572 36. Institute of Medicine. Crossing the quality chasm. [electronic resource] : A new health system  
50 573 for the 21st century: Washington, D.C: National Academy Press; 2001.
- 51 574 37. Group NOSP. National osteoarthritis strategy NSW2018 [Available from:  
52 575 [http://www.acsep.org.au/content/Document/National\\_OA\\_Strategy\\_PostSummit.pdf](http://www.acsep.org.au/content/Document/National_OA_Strategy_PostSummit.pdf).  
53 576

- 1  
2  
3 574 38. Victorian Musculoskeletal Clinical Leadership Group. Victorian model of care for osteoarthritis of  
4 575 the hip and knee. Melbourne MOVE muscle, bone & joint health; 2018.
- 5 576 39. Ackerman IN, Livingston JA, Osborne RH. Personal perspectives on enablers and barriers to  
6 577 accessing care for hip and knee osteoarthritis. *Phys Ther.* 2016;96(1):26-36.
- 7 578 40. Cottrell E, Foster NE, Porcheret M, et al. Gps' attitudes, beliefs and behaviours regarding  
8 579 exercise for chronic knee pain: A questionnaire survey. *BMJ Open.* 2017;7(6):e014999.
- 9 580 41. Egerton T, Nelligan RK, Setchell J, et al. General practitioners' views on managing knee  
10 581 osteoarthritis: A thematic analysis of factors influencing clinical practice guideline implementation in  
11 582 primary care. *BMC Rheumatol.* 2018;2:30.
- 12 583 42. Egerton T, Diamond LE, Buchbinder R, et al. A systematic review and evidence synthesis of  
13 584 qualitative studies to identify primary care clinicians' barriers and enablers to the management of  
14 585 osteoarthritis. *Osteoarthritis Cartilage.* 2017;25(5):625-38.
- 15 586 43. MacKay C, Hawker GA, Jaglal SB. How do physical therapists approach management of people  
16 587 with early knee osteoarthritis? A qualitative study. *Phys Ther.* 2020;100(2):295-306.
- 17 588 44. Tang CY, Pile R, Croft A, et al. Exploring physical therapist adherence to clinical guidelines when  
18 589 treating patients with knee osteoarthritis in australia: A mixed methods study. *Phys Ther.* 2020.
- 19 590 45. Bunzli S, O'Brien BP, Ayton D, et al. Misconceptions and the acceptance of evidence-based  
20 591 nonsurgical interventions for knee osteoarthritis. A qualitative study. *Clin Orthop Relat Res.*  
21 592 2019;477(9):1975-83.
- 22 593 46. Bedson J, Croft PR. The discordance between clinical and radiographic knee osteoarthritis: A  
23 594 systematic search and summary of the literature. *BMC Musculoskeletal Disorders.* 2008;9(1):116.
- 24 595 47. Kinds MB, Welsing PM, Vignon EP, et al. A systematic review of the association between  
25 596 radiographic and clinical osteoarthritis of hip and knee. *Osteoarthritis Cartilage.* 2011;19(7):768-78.
- 26 597 48. Skou ST, Derosche CA, Andersen MM, et al. Nonoperative treatment improves pain irrespective  
27 598 of radiographic severity. A cohort study of 1,414 patients with knee osteoarthritis. *Acta Orthop.*  
28 599 2015;86(5):599-604.
- 29 600 49. Juhl C, Christensen R, Roos EM, et al. Impact of exercise type and dose on pain and disability in  
30 601 knee osteoarthritis: A systematic review and meta-regression analysis of randomized controlled trials.  
31 602 *Arthritis Rheumatol.* 2014;66(3):622-36.
- 32 603 50. Egerton T, Nelligan R, Setchell J, et al. General practitioners' perspectives on a proposed new  
33 604 model of service delivery for primary care management of knee osteoarthritis: A qualitative study. *BMC*  
34 605 *Fam Pract.* 2017;18(1):85.
- 35 606 51. Selten EMH, Vriezekolk JE, Nijhof MW, et al. Barriers impeding the use of non-pharmacological,  
36 607 non-surgical care in hip and knee osteoarthritis: The views of general practitioners, physical therapists,  
37 608 and medical specialists. *J Clin Rheumatol.* 2017;23(8):405-10.
- 38 609 52. Hinman RS, Allen KD, Bennell KL, et al. Development of a core capability framework for qualified  
39 610 health professionals to optimise care for people with osteoarthritis: An oarsi initiative. *Osteoarthritis*  
40 611 *Cartilage.* 2020;28(2):154-66.
- 41 612 53. Royal Australian College of General Practitioners. Guideline for the management of knee and hip  
42 613 osteoarthritis East Melbourne, Victoria: RACGP; 2018. Contract No.: 28 February 2020.
- 43 614 54. Foster NE, Delitto A. Embedding psychosocial perspectives within clinical management of low  
44 615 back pain: Integration of psychosocially informed management principles into physical therapist  
45 616 practice--challenges and opportunities. *Phys Ther.* 2011;91(5):790-803.
- 46 617 55. Australian Bureau of Statistics. 2016 census: Multicultural Census reveals a fast changing,  
47 618 culturally diverse nation. Australia2016.
- 48 619 56. Ackerman IN, Busija L. Access to self-management education, conservative treatment and  
49 620 surgery for arthritis according to socioeconomic status. *Best Pract Res Clin Rheumatol.* 2012;26(5):561-  
50 621 83.

1  
2  
3 622 57. Henschke N, Lorenz E, Pokora R, et al. Understanding cultural influences on back pain and back  
4 623 pain research. Best Practice & Research Clinical Rheumatology. 2016;30(6):1037-49.  
5  
6 624  
7  
8  
9  
10  
11  
12  
13  
14  
15  
16  
17  
18  
19  
20  
21  
22  
23  
24  
25  
26  
27  
28  
29  
30  
31  
32  
33  
34  
35  
36  
37  
38  
39  
40  
41  
42  
43  
44  
45  
46  
47  
48  
49  
50  
51  
52  
53  
54  
55  
56  
57  
58  
59  
60

For peer review only

**Supplementary File 1: An audit trail of evidence showing examples of each stage of the data analysis**

| Original data (Individually assessed by two researchers)                                                            | Code/category (generated by the two researchers)                 | Sub-theme (based on discussion between the researchers)          | Theme (based on discussion between the researchers)    |
|---------------------------------------------------------------------------------------------------------------------|------------------------------------------------------------------|------------------------------------------------------------------|--------------------------------------------------------|
| - We started with x-rays, and that was done by my general practitioner                                              | general practitioner                                             | <i>Prior osteoarthritis care from other health professionals</i> | Presented with a pre-existing osteoarthritis diagnosis |
| - First of all, I went to a knee specialist and then I went to a sports medicine specialist and orthopaedic surgeon | knee specialist, sports medicine specialist, orthopaedic surgeon |                                                                  |                                                        |
| - Initially I went to the orthopaedic surgeon                                                                       | orthopaedic surgeon                                              |                                                                  |                                                        |
| - I went to a specialist in this                                                                                    | specialist                                                       |                                                                  |                                                        |
| - I did a course with Dr L, who is a rheumatologist                                                                 | rheumatologist                                                   |                                                                  |                                                        |
| - I suffered quite a bit of pain and I was referred to a specialist                                                 | specialist                                                       |                                                                  |                                                        |
| - I went to see a surgeon with the possible view of having replacements done                                        | surgeon                                                          |                                                                  |                                                        |
| - If it's bone on bone that doesn't replace the cartilage                                                           | Bone on bone, no cartilage                                       | <i>Perception of adequate osteoarthritis knowledge</i>           |                                                        |
| - I've got a fair bit of wear and tear but because of my age                                                        | Wear and tear due to age                                         |                                                                  |                                                        |
| - It's just basically wear and tear, and it's really bone on bone                                                   | Wear and tear, bone on bone                                      |                                                                  |                                                        |
| - I've had all those tests. So I had all that and that's when they discovered [osteoarthritis]                      | Tests to confirm osteoarthritis                                  |                                                                  |                                                        |
| - My understanding is it's really just a bit of integral wear and tear of the joint                                 | Understanding, wear and tear                                     |                                                                  |                                                        |
| - I have a fairly good understanding of what osteoarthritis                                                         | Good understanding of osteoarthritis                             |                                                                  |                                                        |

|    |                                                              |                        |                                     |                                                              |
|----|--------------------------------------------------------------|------------------------|-------------------------------------|--------------------------------------------------------------|
| 1  |                                                              |                        |                                     |                                                              |
| 2  |                                                              |                        |                                     |                                                              |
| 3  | - I just chose them because I knew they did Pilates and      | Self- referral         | <i>Referral pathways</i>            | Wide variation in access and provision of physiotherapy care |
| 4  | exercise rehab                                               |                        |                                     |                                                              |
| 5  |                                                              |                        |                                     |                                                              |
| 6  | - follow up physiotherapy after the arthroscopy              | Rehabilitation program |                                     |                                                              |
| 7  | - it [physiotherapy] was convenient because it was near      | Self- referral         |                                     |                                                              |
| 8  | my general practitioner                                      |                        |                                     |                                                              |
| 9  | - Probably word of mouth                                     | Peer recommendation    |                                     |                                                              |
| 10 | - I've actually had a work injury, so that [physiotherapy]   | Through work           |                                     |                                                              |
| 11 | was actually paid through my injury                          | compensation scheme    |                                     |                                                              |
| 12 |                                                              |                        |                                     |                                                              |
| 13 |                                                              |                        |                                     |                                                              |
| 14 | - That [physiotherapy] was part of an advanced health care   | Referred by doctor     |                                     |                                                              |
| 15 | plan                                                         |                        |                                     |                                                              |
| 16 | - The general practitioner sent me to a physiotherapist      | Referred by doctor     |                                     |                                                              |
| 17 |                                                              |                        |                                     |                                                              |
| 18 |                                                              |                        |                                     |                                                              |
| 19 | - I went to see a knee specialist, he suggested that         | Referred by specialist |                                     |                                                              |
| 20 | physiotherapy might help strengthen the muscles              |                        |                                     |                                                              |
| 21 | - I got them off the EPC Plan                                | Medicare subsidy       | <i>Funding models</i>               |                                                              |
| 22 | - Subsidised by my health insurance                          | Health insurance       |                                     |                                                              |
| 23 | - I've got private health cover, so I paid a gap             | Health insurance       |                                     |                                                              |
| 24 | - WorkCover then ceased to cover me                          | Work compensation      |                                     |                                                              |
| 25 |                                                              | scheme                 |                                     |                                                              |
| 26 |                                                              |                        |                                     |                                                              |
| 27 | - I've actually had a work injury, so that was actually paid | Work compensation      |                                     |                                                              |
| 28 | through my injury                                            | scheme                 |                                     |                                                              |
| 29 | - I was doing them myself out-of-pocket                      | Self-funded            |                                     |                                                              |
| 30 | - I actually participated in the GLA:D programme             | Group setting          | <i>Individual vs group sessions</i> |                                                              |
| 31 |                                                              |                        |                                     |                                                              |
| 32 |                                                              |                        |                                     |                                                              |
| 33 | - They [the physiotherapist] wanted me to do the pilates in  | Group setting          |                                     |                                                              |
| 34 | the group                                                    |                        |                                     |                                                              |
| 35 | - trying to get me involved in aqua aerobics                 | Group setting          |                                     |                                                              |
| 36 |                                                              |                        |                                     |                                                              |
| 37 |                                                              |                        |                                     |                                                              |
| 38 | - The first has been my regular physio who I've seen for     | 1:1                    |                                     |                                                              |
| 39 | probably about four years                                    |                        |                                     |                                                              |
| 40 |                                                              |                        |                                     |                                                              |
| 41 |                                                              |                        |                                     |                                                              |
| 42 |                                                              |                        |                                     |                                                              |
| 43 |                                                              |                        |                                     |                                                              |
| 44 |                                                              |                        |                                     |                                                              |
| 45 |                                                              |                        |                                     |                                                              |
| 46 |                                                              |                        |                                     |                                                              |

|    |                                                               |                            |                               |                        |
|----|---------------------------------------------------------------|----------------------------|-------------------------------|------------------------|
| 1  |                                                               |                            |                               |                        |
| 2  |                                                               |                            |                               |                        |
| 3  | - continuing with intermittent physiotherapy sessions as      | 1:1                        |                               |                        |
| 4  | well as exercising at home                                    |                            |                               |                        |
| 5  | - as part of the bike fit the physio did a full-on assessment | 1:1                        |                               |                        |
| 6  |                                                               |                            |                               |                        |
| 7  | - the pain was just killing me. I would be in tears with the  | Knee pain                  | <i>Knee symptoms</i>          | Seeking physiotherapy  |
| 8  | pain.                                                         |                            |                               | care for pain and      |
| 9  |                                                               |                            |                               | functional limitations |
| 10 | - I wanted to go and build-up the strength in my legs         | Knee weakness              |                               |                        |
| 11 | - I've had this really sore knee that's basically collapsing  | Knee pain and weakness     |                               |                        |
| 12 | underneath                                                    |                            |                               |                        |
| 13 | - it was swollen, hot, and I couldn't walk without a          | Knee swelling, pain        |                               |                        |
| 14 | walking stick. It was very painful                            |                            |                               |                        |
| 15 | - Loss of support. I was having trouble, I was struggling     | Knee weakness, poor        |                               |                        |
| 16 | walking because the knee would just suddenly give way,        | support                    |                               |                        |
| 17 | and I'd fall down                                             |                            |                               |                        |
| 18 | - my knees were becoming more and more sore and               | Knee pain, clicking        |                               |                        |
| 19 | clicking as I walked                                          |                            |                               |                        |
| 20 | - my knees were becoming more and more sore and               | Difficulty with steps      | <i>Functional problems</i>    |                        |
| 21 | clicking as I walked, particularly up sets of stairs          | negotiation                |                               |                        |
| 22 | - my gait's not very good and it's throwing my back out. I    | Walking difficulty         |                               |                        |
| 23 | was heading overseas and thought I've got to do               |                            |                               |                        |
| 24 | something about this, I can't be hobbling around.             | Walking difficulty         |                               |                        |
| 25 | - I could not stand up out the chair unaided                  | Difficulty getting off the |                               |                        |
| 26 |                                                               | chair                      |                               |                        |
| 27 | - I was struggling to walk                                    | Walking difficulty         |                               |                        |
| 28 | - Because I've lost capacity to squat                         | Difficulty squatting       |                               |                        |
| 29 |                                                               |                            |                               |                        |
| 30 | - I think she [the physiotherapist] made me walk a little bit | Gait assessment            | <i>Assessment of function</i> | Physiotherapy          |
| 31 |                                                               |                            |                               | management focussed on |
| 32 |                                                               |                            |                               | function and exercise  |
| 33 |                                                               |                            |                               |                        |
| 34 |                                                               |                            |                               |                        |
| 35 | - They'll [the physiotherapist] get you to do a few           | Functional tasks           |                               |                        |
| 36 | activities to try and I guess test the limits of what you     |                            |                               |                        |
| 37 | can and can't do with your knee – squatting, bending,         |                            |                               |                        |
| 38 | rotation                                                      |                            |                               |                        |
| 39 |                                                               |                            |                               |                        |
| 40 |                                                               |                            |                               |                        |
| 41 |                                                               |                            |                               |                        |
| 42 |                                                               |                            |                               |                        |
| 43 |                                                               |                            |                               |                        |
| 44 |                                                               |                            |                               |                        |
| 45 |                                                               |                            |                               |                        |
| 46 |                                                               |                            |                               |                        |

- 1  
2  
3  
4  
5  
6  
7  
8  
9  
10  
11  
12  
13  
14  
15  
16  
17  
18  
19  
20  
21  
22  
23  
24  
25  
26  
27  
28  
29  
30  
31  
32  
33  
34  
35  
36  
37  
38  
39  
40  
41  
42  
43  
44  
45  
46
- timing or just observing, getting in and out of a chair      Functional tasks
  - the [physiotherapist] just got me doing step-ups      Steps assessment
  - the [physiotherapist] got me to walk straight away from      Gait assessment  
him and then turn around and come straight back
  - she [the physiotherapist] recommended to keep riding      Bike, cardio      *Various types of  
the pushbike      exercises prescribed*
  - we went to the hydro      Hydrotherapy
  - advised me to walk in the pool, go on the exercise bike,      Water exercise, bike,  
those sorts of things      cardio
  - to walk on the treadmill for five minutes as a warmup      Gym workout
  - she's [the physiotherapist] given me stretching exercises      Theraband  
with a rubber band
  - the [the physiotherapist] gave me, swimming, wall press      Swimming, functional  
ups, yeah, biceps, standing with dumbbells, and bridge,      exercise, strengthening  
lie on your back, clamshells, wall squats, single leg  
stance with eyes open, seated abduction ball squeeze
  - I think it's the rheumatologist or my general practitioner      Medication is GP's role      *Surgery, medications,  
probably, they would be the ones that would be issuing      and injections are for  
the drugs so I didn't think that would be a physio's      doctors*
  - I get the impression the physio doesn't want to go into      Medication is not the  
the drug side of it because of the risks      physiotherapist's role
  - the doctor had covered that [medication]. I didn't feel      Medication is GP's role  
that I need my physio [needs] to
  - No but it's not his [the physiotherapist] place to manage      Medication is GP's role  
it. Medications, the doctor does that.
  - Because the surgeon will know better about how      Surgery is the specialist's  
advanced it is      role
  - I remember him [physiotherapist] saying, your next point      Surgery is the specialist's  
of call could be to go and speak to a physician who      role  
specialises in knees



- |                                  |                                                                                                                                                                                         |                                            |                                |                                    |
|----------------------------------|-----------------------------------------------------------------------------------------------------------------------------------------------------------------------------------------|--------------------------------------------|--------------------------------|------------------------------------|
| 1<br>2<br>3<br>4<br>5<br>6<br>7  | - They [the physiotherapist] said what you need to do is we're going to refer you to the doctor, and he can then make the best decision on what treatment should happen with your knee. | Surgery is the specialist's role           |                                |                                    |
| 8<br>9                           | - She [the physiotherapist] did a little massage on my calf and my knee                                                                                                                 | Massage                                    | <i>Adjunctive treatments</i>   |                                    |
| 10<br>11                         | - I think they've [the physiotherapist] played around with a TENS machine                                                                                                               | TENS, electrotherapy                       |                                |                                    |
| 12<br>13<br>14                   | - He [the physiotherapist] gave me exercises; put a little machine on my knee                                                                                                           | Electrotherapy                             |                                |                                    |
| 15<br>16                         | - she [the physiotherapist] would do deep tissue massage for five to 10 minutes                                                                                                         | Massage                                    |                                |                                    |
| 17                               | - I had some strapping of the knee                                                                                                                                                      | Taping                                     |                                |                                    |
| 18<br>19                         | - I think I would've got some, a little bit of ultrasound                                                                                                                               | Ultrasound,<br>electrotherapy              |                                |                                    |
| 20<br>21<br>22                   | - I think it's called EMS machine, an electronic stimulation machine                                                                                                                    | EMS, electrotherapy                        |                                |                                    |
| 23<br>24                         | - she [the physiotherapist] had advised me to wear a Tubigrip, just pressure bandage over the knee                                                                                      | Tubigrip, knee bracing                     |                                |                                    |
| 25<br>26<br>27                   | - He [the physiotherapist] was extremely good and I had complete trust in what he was doing                                                                                             | Trust in the physiotherapist,<br>confident | <i>Trust and/or confidence</i> | Professional and personalized care |
| 28<br>29<br>30<br>31             | - I think we had quite a good relationship and he [the physiotherapist] also knew my background and what I'd been through                                                               | Good relationship, trust                   |                                |                                    |
| 32<br>33                         | - She [the physiotherapist] had an instant grasp of what was happening and what was needed to try and assist                                                                            | Understood my concern,<br>tried to help    |                                |                                    |
| 34<br>35<br>36                   | - [The physiotherapist] was great and he was fairly well read and understanding of the situation                                                                                        | Competent, trust and confident             |                                |                                    |
| 37<br>38<br>39<br>40<br>41<br>42 | - what I can say about my physio is that I think he has a very good understanding of my knee problem and I think he understands that better than my doctors                             | Good relationship,<br>understanding        |                                |                                    |



- |                                                                                                                                                                                                 |                                                                    |                                                  |
|-------------------------------------------------------------------------------------------------------------------------------------------------------------------------------------------------|--------------------------------------------------------------------|--------------------------------------------------|
| - They [the physiotherapist] were always very empathetic towards it                                                                                                                             | Empathetic                                                         |                                                  |
| - I think she [the physiotherapist] understood what my concerns were, she looked at all those things and helped me with them.                                                                   | Specific to the concern, helped me                                 | <i>Personalized care</i>                         |
| - She [the physiotherapist] was always checking back with me to make sure that it was possible for me to do it or if I could cope with it or whatever the case was                              | Checking with me                                                   |                                                  |
| - there was nothing that I wasn't confused about. And it was a two-way discussion                                                                                                               | Two-way discussion                                                 |                                                  |
| - the [physiotherapist] assessed it best by working with me                                                                                                                                     | Working with me                                                    |                                                  |
| - The surgeon said to me he probably gives me 10 years out of my right knee                                                                                                                     | Postpone surgery                                                   | Physiotherapy to postpone or prepare for surgery |
| - I actually am going to go to the orthopaedic specialist in February to have a look and just see whether I should have a replacement                                                           | Intention for knee surgery, preparation                            |                                                  |
| - My doctor just told me that I'm going to need a knee replacement eventually and so did the specialist surgeon, so I thought well I don't want to have a knee replacement just at this stage.  | Need a knee replacement but not at this stage, prepare for surgery |                                                  |
| - We were talking about the advantages of doing it [surgery] sooner than later, but then he's [the physiotherapist] saying if I do it a bit later then we can strengthen the muscles in my knee | Prepare for surgery                                                |                                                  |
| - I'm on a waiting list to have a knee replacement, but when that happens, who knows                                                                                                            | Waiting list for knee replacement                                  |                                                  |

EMS: Electrical muscle stimulation

EPC: Enhanced primary care

GLA:D: Good Life with Osteoarthritis: Denmark (GLA:D)

TENS: Transcutaneous electrical nerve stimulation

**Standards for Reporting Qualitative Research (SRQR)**

| No.                       | Topic                                        | Item                                                                                                                                                                                                                                                                                                                                             | Page/line number                    |
|---------------------------|----------------------------------------------|--------------------------------------------------------------------------------------------------------------------------------------------------------------------------------------------------------------------------------------------------------------------------------------------------------------------------------------------------|-------------------------------------|
| <b>Title and abstract</b> |                                              |                                                                                                                                                                                                                                                                                                                                                  |                                     |
| S1                        | Title                                        | Concise description of the nature and topic of the study Identifying the study as qualitative or indicating the approach (e.g., ethnography, grounded theory) or data collection methods (e.g., interview, focus group) is recommended                                                                                                           | Page 1, line 1                      |
| S2                        | Abstract                                     | Summary of key elements of the study using the abstract format of the intended publication; typically includes background, purpose, methods, results, and conclusions                                                                                                                                                                            | Page 2, line 23                     |
| <b>Introduction</b>       |                                              |                                                                                                                                                                                                                                                                                                                                                  |                                     |
| S3                        | Problem formulation                          | Description and significance of the problem/phenomenon studied; review of relevant theory and empirical work; problem statement                                                                                                                                                                                                                  | Page 5, line 95                     |
| S4                        | Purpose or research question                 | Purpose of the study and specific objectives or questions                                                                                                                                                                                                                                                                                        | Page 6, line 116                    |
| <b>Methods</b>            |                                              |                                                                                                                                                                                                                                                                                                                                                  |                                     |
| S5                        | Qualitative approach and research paradigm   | Qualitative approach (e.g., ethnography, grounded theory, case study, phenomenology, narrative research) and guiding theory if appropriate; identifying the research paradigm (e.g., postpositivist, constructivist/interpretivist) is also recommended; rationale <sup>b</sup>                                                                  | Page 7, line 146                    |
| S6                        | Researcher characteristics and reflexivity   | Researchers' characteristics that may influence the research, including personal attributes, qualifications/experience, relationship with participants, assumptions, and/or presuppositions; potential or actual interaction between researchers' characteristics and the research questions, approach, methods, results, and/or transferability | Page 10, line 176                   |
| S7                        | Context                                      | Setting/site and salient contextual factors; rationale <sup>b</sup>                                                                                                                                                                                                                                                                              | Page 8, line 156                    |
| S8                        | Sampling strategy                            | How and why research participants, documents, or events were selected; criteria for deciding when no further sampling was necessary (e.g., sampling saturation); rationale <sup>b</sup>                                                                                                                                                          | Page 8, line 156                    |
| S9                        | Ethical issues pertaining to human subjects  | Documentation of approval by an appropriate ethics review board and participant consent, or explanation for lack thereof; other confidentiality and data security issues                                                                                                                                                                         | Page 8, line 164                    |
| S10                       | Data collection methods                      | Types of data collected; details of data collection procedures including (as appropriate) start and stop dates of data collection and analysis, iterative process, triangulation of sources/methods, and modification of procedures in response to evolving study findings; rationale <sup>b</sup>                                               | Page 8, line 168; Page 10, line 186 |
| S11                       | Data collection instruments and technologies | Description of instruments (e.g., interview guides, questionnaires) and devices (e.g., audio recorders) used for data collection; if/how the instrument(s) changed over the course of the study                                                                                                                                                  | Page 8, line 168                    |
| S12                       | Units of study                               | Number and relevant characteristics of participants, documents, or events included in the study; level of participation (could be reported in results)                                                                                                                                                                                           | Page 11, line 201                   |
| S13                       | Data processing                              | Methods for processing data prior to and during analysis, including transcription, data entry, data management and security, verification                                                                                                                                                                                                        | Page 10, line 186                   |

|                         |                                                                                              |                                                                                                                                                                                                                                                                                                       |                                      |
|-------------------------|----------------------------------------------------------------------------------------------|-------------------------------------------------------------------------------------------------------------------------------------------------------------------------------------------------------------------------------------------------------------------------------------------------------|--------------------------------------|
|                         |                                                                                              | of data integrity, data coding, and anonymization/deidentification of excerpts                                                                                                                                                                                                                        |                                      |
| S14                     | Data analysis                                                                                | Process by which inferences, themes, etc., were identified and developed, including the researchers involved in data analysis; usually references a specific paradigm or approach; rationale <sup>b</sup>                                                                                             | Page 10, line 186                    |
| S15                     | Techniques to enhance trustworthiness                                                        | Techniques to enhance trustworthiness and credibility of data analysis<br><br>(e.g., member checking, audit trail, triangulation); rationale <sup>b</sup>                                                                                                                                             | Page 10, line 186; Page 14, line 224 |
| <b>Results/findings</b> |                                                                                              |                                                                                                                                                                                                                                                                                                       |                                      |
| S16                     | Synthesis and interpretation                                                                 | Main findings (e.g., interpretations, inferences, and themes); might<br><br>include development of a theory or model, or integration with prior research or theory                                                                                                                                    | Page 20, line 242; Page 24, line 348 |
| S17                     | Links to empirical data                                                                      | Evidence (e.g., quotes, field notes, text excerpts, photographs) to substantiate analytic findings                                                                                                                                                                                                    | Page 14, line 227                    |
| <b>Discussion</b>       |                                                                                              |                                                                                                                                                                                                                                                                                                       |                                      |
| S18                     | Integration with prior work, implications, transferability, and contribution(s) to the field | Short summary of main findings; explanation of how findings and conclusions connect to, support, elaborate on, or challenge conclusions of earlier scholarship; discussion of scope of application/generalizability; identification of unique contribution(s) to scholarship in a discipline or field | Page 26, line 354                    |
| S19                     | Limitations                                                                                  | Trustworthiness and limitations of findings                                                                                                                                                                                                                                                           | Page 31, line 476                    |
| S20                     | Conflicts of interest                                                                        | Potential sources of influence or perceived influence on study conduct and conclusions; how these were managed                                                                                                                                                                                        | Page 33, line 521                    |
| S21                     | Funding                                                                                      | Sources of funding and other support; role of funders in data collection, interpretation, and reporting                                                                                                                                                                                               | Page 33, line 511                    |
