# Supplementary material for: Patient experiences with physiotherapy for knee osteoarthritis in Australia—a qualitative study
Source: PubMed Central journal article supplement — BMJ Open. 2021 Mar 8;11(3):e043689. doi: 10.1136/bmjopen-2020-043689 (PMC7942256; doi:10.1136/bmjopen-2020-043689), 2021-03-08
Supplement: bmjopen-2020-043689supp001.pdf [file bmjopen-2020-043689supp001.pdf]

**Supplementary File 1:** An audit trail of evidence showing examples of each stage of the data analysis

| Original data (Individually assessed by two researchers)                                                                                                                                                                                                                                                                                                                                                                                                                                                                                                                                                                                                  | Code/category (generated by the two researchers)                                                                                                                                                                                                                                                   | Sub-theme (based on discussion between the researchers)                                                                                                                            | Theme (based on discussion between the researchers)                                                      |
|-----------------------------------------------------------------------------------------------------------------------------------------------------------------------------------------------------------------------------------------------------------------------------------------------------------------------------------------------------------------------------------------------------------------------------------------------------------------------------------------------------------------------------------------------------------------------------------------------------------------------------------------------------------|----------------------------------------------------------------------------------------------------------------------------------------------------------------------------------------------------------------------------------------------------------------------------------------------------|------------------------------------------------------------------------------------------------------------------------------------------------------------------------------------|----------------------------------------------------------------------------------------------------------|
| <ul style="list-style-type: none"> <li>- We started with x-rays, and that was done by my general practitioner</li> <li>- First of all, I went to a knee specialist and then I went to a sports medicine specialist and orthopaedic surgeon</li> <li>- Initially I went to the orthopaedic surgeon</li> <li>- I went to a specialist in this</li> <li>- I did a course with Dr L, who is a rheumatologist</li> <li>- I suffered quite a bit of pain and I was referred to a specialist</li> <li>- I went to see a surgeon with the possible view of having replacements done</li> <li>- If it's bone on bone that doesn't replace the cartilage</li> </ul> | <ul style="list-style-type: none"> <li>general practitioner</li> <li>knee specialist, sports medicine specialist, orthopaedic surgeon</li> <li>orthopaedic surgeon</li> <li>specialist</li> <li>rheumatologist</li> <li>specialist</li> <li>surgeon</li> <li>Bone on bone, no cartilage</li> </ul> | <ul style="list-style-type: none"> <li><i>Prior osteoarthritis care from other health professionals</i></li> <li><i>Perception of adequate osteoarthritis knowledge</i></li> </ul> | <ul style="list-style-type: none"> <li>Presented with a pre-existing osteoarthritis diagnosis</li> </ul> |
| <ul style="list-style-type: none"> <li>- I've got a fair bit of wear and tear but because of my age</li> <li>- It's just basically wear and tear, and it's really bone on bone</li> <li>- I've had all those tests. So I had all that and that's when they discovered [osteoarthritis]</li> <li>- My understanding is it's really just a bit of integral wear and tear of the joint</li> <li>- I have a fairly good understanding of what osteoarthritis</li> </ul>                                                                                                                                                                                       | <ul style="list-style-type: none"> <li>Wear and tear due to age</li> <li>Wear and tear, bone on bone</li> <li>Tests to confirm osteoarthritis</li> <li>Understanding, wear and tear</li> <li>Good understanding of osteoarthritis</li> </ul>                                                       |                                                                                                                                                                                    |                                                                                                          |

|                                                                                                      |                                  |                                     |                                                              |
|------------------------------------------------------------------------------------------------------|----------------------------------|-------------------------------------|--------------------------------------------------------------|
| - I just chose them because I knew they did Pilates and exercise rehab                               | Self- referral                   | <i>Referral pathways</i>            | Wide variation in access and provision of physiotherapy care |
| - follow up physiotherapy after the arthroscopy                                                      | Rehabilitation program           |                                     |                                                              |
| - it [physiotherapy] was convenient because it was near my general practitioner                      | Self- referral                   |                                     |                                                              |
| - Probably word of mouth                                                                             | Peer recommendation              |                                     |                                                              |
| - I've actually had a work injury, so that [physiotherapy] was actually paid through my injury       | Through work compensation scheme |                                     |                                                              |
| - That [physiotherapy] was part of an advanced health care plan                                      | Referred by doctor               |                                     |                                                              |
| - The general practitioner sent me to a physiotherapist                                              | Referred by doctor               |                                     |                                                              |
| - I went to see a knee specialist, he suggested that physiotherapy might help strengthen the muscles | Referred by specialist           |                                     |                                                              |
| - I got them off the EPC Plan                                                                        | Medicare subsidy                 | <i>Funding models</i>               |                                                              |
| - Subsidised by my health insurance                                                                  | Health insurance                 |                                     |                                                              |
| - I've got private health cover, so I paid a gap                                                     | Health insurance                 |                                     |                                                              |
| - WorkCover then ceased to cover me                                                                  | Work compensation scheme         |                                     |                                                              |
| - I've actually had a work injury, so that was actually paid through my injury                       | Work compensation scheme         |                                     |                                                              |
| - I was doing them myself out-of-pocket                                                              | Self-funded                      |                                     |                                                              |
| - I actually participated in the GLA:D programme                                                     | Group setting                    | <i>Individual vs group sessions</i> |                                                              |
| - They [the physiotherapist] wanted me to do the pilates in the group                                | Group setting                    |                                     |                                                              |
| - trying to get me involved in aqua aerobics                                                         | Group setting                    |                                     |                                                              |
| - The first has been my regular physio who I've seen for probably about four years                   | 1:1                              |                                     |                                                              |

|                                                                                                                                                                              |                                   |                               |                                                                |  |
|------------------------------------------------------------------------------------------------------------------------------------------------------------------------------|-----------------------------------|-------------------------------|----------------------------------------------------------------|--|
| - continuing with intermittent physiotherapy sessions as well as exercising at home                                                                                          | 1:1                               |                               |                                                                |  |
| - as part of the bike fit the physio did a full-on assessment                                                                                                                | 1:1                               |                               |                                                                |  |
| - the pain was just killing me. I would be in tears with the pain.                                                                                                           | Knee pain                         | <i>Knee symptoms</i>          | Seeking physiotherapy care for pain and functional limitations |  |
| - I wanted to go and build-up the strength in my legs                                                                                                                        | Knee weakness                     |                               |                                                                |  |
| - I've had this really sore knee that's basically collapsing underneath                                                                                                      | Knee pain and weakness            |                               |                                                                |  |
| - it was swollen, hot, and I couldn't walk without a walking stick. It was very painful                                                                                      | Knee swelling, pain               |                               |                                                                |  |
| - Loss of support. I was having trouble, I was struggling walking because the knee would just suddenly give way, and I'd fall down                                           | Knee weakness, poor support       |                               |                                                                |  |
| - my knees were becoming more and more sore and clicking as I walked                                                                                                         | Knee pain, clicking               |                               |                                                                |  |
| - my knees were becoming more and more sore and clicking as I walked, particularly up sets of stairs                                                                         | Difficulty with steps negotiation | <i>Functional problems</i>    |                                                                |  |
| - my gait's not very good and it's throwing my back out. I was heading overseas and thought I've got to do                                                                   | Walking difficulty                |                               |                                                                |  |
| - something about this, I can't be hobbling around.                                                                                                                          | Walking difficulty                |                               |                                                                |  |
| - I could not stand up out the chair unaided                                                                                                                                 | Difficulty getting off the chair  |                               |                                                                |  |
| - I was struggling to walk                                                                                                                                                   | Walking difficulty                |                               |                                                                |  |
| - Because I've lost capacity to squat                                                                                                                                        | Difficulty squatting              |                               |                                                                |  |
| - I think she [the physiotherapist] made me walk a little bit                                                                                                                | Gait assessment                   | <i>Assessment of function</i> | Physiotherapy management focussed on function and exercise     |  |
| - They'll [the physiotherapist] get you to do a few activities to try and I guess test the limits of what you can and can't do with your knee – squatting, bending, rotation | Functional tasks                  |                               |                                                                |  |

|                                                                                                                                                                                                                              |                                              |                                                             |
|------------------------------------------------------------------------------------------------------------------------------------------------------------------------------------------------------------------------------|----------------------------------------------|-------------------------------------------------------------|
| - timing or just observing, getting in and out of a chair                                                                                                                                                                    | Functional tasks                             |                                                             |
| - the [physiotherapist] just got me doing step-ups                                                                                                                                                                           | Steps assessment                             |                                                             |
| - the [physiotherapist] got me to walk straight away from him and then turn around and come straight back towards him                                                                                                        | Gait assessment                              |                                                             |
| - she [the physiotherapist] recommended to keep riding the pushbike                                                                                                                                                          | Bike, cardio                                 | <i>Various types of exercises prescribed</i>                |
| - we went to the hydro                                                                                                                                                                                                       | Hydrotherapy                                 |                                                             |
| - advised me to walk in the pool, go on the exercise bike, those sorts of things                                                                                                                                             | Water exercise, bike, cardio                 |                                                             |
| - to walk on the treadmill for five minutes as a warmup                                                                                                                                                                      | Gym workout                                  |                                                             |
| - she's [the physiotherapist] given me stretching exercises with a rubber band                                                                                                                                               | Theraband                                    |                                                             |
| - the [the physiotherapist] gave me, swimming, wall press ups, yeah, biceps, standing with dumbbells, and bridge, lie on your back, clamshells, wall squats, single leg stance with eyes open, seated abduction ball squeeze | Swimming, functional exercise, strengthening |                                                             |
| - I think it's the rheumatologist or my general practitioner probably, they would be the ones that would be issuing the drugs so I didn't think that would be a physio's                                                     | Medication is GP's role                      | <i>Surgery, medications, and injections are for doctors</i> |
| - I get the impression the physio doesn't want to go into the drug side of it because of the risks                                                                                                                           | Medication is not the physiotherapist's role |                                                             |
| - the doctor had covered that [medication]. I didn't feel that I need my physio [needs] to                                                                                                                                   | Medication is GP's role                      |                                                             |
| - No but it's not his [the physiotherapist] place to manage it. Medications, the doctor does that.                                                                                                                           | Medication is GP's role                      |                                                             |
| - Because the surgeon will know better about how advanced it is                                                                                                                                                              | Surgery is the specialist's role             |                                                             |
| - I remember him [physiotherapist] saying, your next point of call could be to go and speak to a physician who specialises in knees                                                                                          | Surgery is the specialist's role             |                                                             |

|                                                                                                                                                                                         |                                         |                                |                                    |
|-----------------------------------------------------------------------------------------------------------------------------------------------------------------------------------------|-----------------------------------------|--------------------------------|------------------------------------|
| - They [the physiotherapist] said what you need to do is we're going to refer you to the doctor, and he can then make the best decision on what treatment should happen with your knee. | Surgery is the specialist's role        |                                |                                    |
| - She [the physiotherapist] did a little massage on my calf and my knee                                                                                                                 | Massage                                 | <i>Adjunctive treatments</i>   |                                    |
| - I think they've [the physiotherapist] played around with a TENS machine                                                                                                               | TENS, electrotherapy                    |                                |                                    |
| - He [the physiotherapist] gave me exercises; put a little machine on my knee                                                                                                           | Electrotherapy                          |                                |                                    |
| - she [the physiotherapist] would do deep tissue massage for five to 10 minutes                                                                                                         | Massage                                 |                                |                                    |
| - I had some strapping of the knee                                                                                                                                                      | Taping                                  |                                |                                    |
| - I think I would've got some, a little bit of ultrasound                                                                                                                               | Ultrasound, electrotherapy              |                                |                                    |
| - I think it's called EMS machine, an electronic stimulation machine                                                                                                                    | EMS, electrotherapy                     |                                |                                    |
| - she [the physiotherapist] had advised me to wear a Tubigrip, just pressure bandage over the knee                                                                                      | Tubigrip, knee bracing                  |                                |                                    |
| - He [the physiotherapist] was extremely good and I had complete trust in what he was doing                                                                                             | Trust in the physiotherapist, confident | <i>Trust and/or confidence</i> | Professional and personalized care |
| - I think we had quite a good relationship and he [the physiotherapist] also knew my background and what I'd been through                                                               | Good relationship, trust                |                                |                                    |
| - She [the physiotherapist] had an instant grasp of what was happening and what was needed to try and assist                                                                            | Understood my concern, tried to help    |                                |                                    |
| - [The physiotherapist] was great and he was fairly well read and understanding of the situation                                                                                        | Competent, trust and confident          |                                |                                    |
| - what I can say about my physio is that I think he has a very good understanding of my knee problem and I think he understands that better than my doctors                             | Good relationship, understanding        |                                |                                    |

|                                                                                                                                                                                                 |                                                                    |                                                  |
|-------------------------------------------------------------------------------------------------------------------------------------------------------------------------------------------------|--------------------------------------------------------------------|--------------------------------------------------|
| - They [the physiotherapist] were always very empathetic towards it                                                                                                                             | Empathetic                                                         |                                                  |
| - I think she [the physiotherapist] understood what my concerns were, she looked at all those things and helped me with them.                                                                   | Specific to the concern, helped me                                 | <i>Personalized care</i>                         |
| - She [the physiotherapist] was always checking back with me to make sure that it was possible for me to do it or if I could cope with it or whatever the case was                              | Checking with me                                                   |                                                  |
| - there was nothing that I wasn't confused about. And it was a two-way discussion                                                                                                               | Two-way discussion                                                 |                                                  |
| - the [physiotherapist] assessed it best by working with me                                                                                                                                     | Working with me                                                    |                                                  |
| - The surgeon said to me he probably gives me 10 years out of my right knee                                                                                                                     | Postpone surgery                                                   | Physiotherapy to postpone or prepare for surgery |
| - I actually am going to go to the orthopaedic specialist in February to have a look and just see whether I should have a replacement                                                           | Intention for knee surgery, preparation                            |                                                  |
| - My doctor just told me that I'm going to need a knee replacement eventually and so did the specialist surgeon, so I thought well I don't want to have a knee replacement just at this stage.  | Need a knee replacement but not at this stage, prepare for surgery |                                                  |
| - We were talking about the advantages of doing it [surgery] sooner than later, but then he's [the physiotherapist] saying if I do it a bit later then we can strengthen the muscles in my knee | Prepare for surgery                                                |                                                  |
| - I'm on a waiting list to have a knee replacement, but when that happens, who knows                                                                                                            | Waiting list for knee replacement                                  |                                                  |

EMS: Electrical muscle stimulation  
EPC: Enhanced primary care  
GLA:D: Good Life with Osteoarthritis: Denmark (GLA:D)  
TENS: Transcutaneous electrical nerve stimulation
